# Supplementary material for: Silver-catalyzed nitrosation and nitration of aromatic amides using NOBF4
Source: Royal Society of Chemistry journal article supplement (doi:10.1039/d3ob01729j), 2023-01-01

# Silver-catalyzed nitrosation and nitration of aromatic amides using NOBF<sub>4</sub>

Sa Li,<sup>a</sup> Wentao Liu,<sup>b</sup> Xiao-Feng Xia<sup>a,\*</sup>

<sup>a</sup>Key Laboratory of Synthetic and Biological Colloids, Ministry of Education, School of Chemical and Material Engineering, Jiangnan University, Wuxi, Jiangsu, 214122, China. E-mail: [xiacf@jiangnan.edu.cn](mailto:xiacf@jiangnan.edu.cn)

<sup>b</sup>Industry and Information Technology Development Center of Yinan County, Linyi, Shandong, 276300, China.

| <b>Table of Contents</b> |                                                                                                                                   |                |
|--------------------------|-----------------------------------------------------------------------------------------------------------------------------------|----------------|
| <b>I</b>                 | <b>General Remarks</b>                                                                                                            | <b>S1</b>      |
| <b>II</b>                | <b>Preparation of Starting Materials 1a-1f, 3a-3q, 5a-5p</b>                                                                      | <b>S1-S2</b>   |
| <b>III</b>               | <b>Screening of reaction conditions</b>                                                                                           | <b>S2-S3</b>   |
| <b>IV</b>                | <b>Reduction experiment</b>                                                                                                       | <b>S3-S4</b>   |
| <b>V</b>                 | <b>General Procedure for the synthesis of products 2, 4, 6, 7a, 8a, 9a</b>                                                        | <b>S4</b>      |
| <b>VI</b>                | <b>Scale-up experiment</b>                                                                                                        | <b>S5</b>      |
| <b>VII</b>               | <b>Control experiments</b>                                                                                                        | <b>S5</b>      |
| <b>VIII</b>              | <b>Date of products 2, 4, 6, 7a, 8a, 9a, 10, 11,12,13, 13'</b>                                                                    | <b>S5-S17</b>  |
| <b>IX</b>                | <b>References</b>                                                                                                                 | <b>S17-S18</b> |
| <b>X</b>                 | <b><sup>1</sup>H NMR, <sup>13</sup>C NMR and <sup>19</sup>F NMR spectra of compounds 2, 4, 6, 7a, 8a, 9a, 10, 11, 12, 13, 13'</b> | <b>S18-S65</b> |



brine and dried over Na<sub>2</sub>SO<sub>4</sub>. After removal of the solvent under reduced pressure, the residue was purified by recrystallization with petroleum ether/CH<sub>2</sub>Cl<sub>2</sub>, to obtain the desired products **3a-3q**.

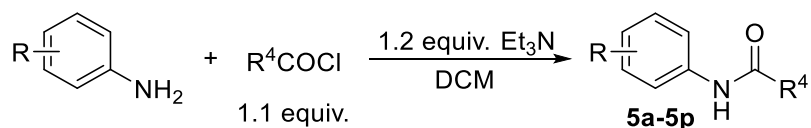

For preparation of **5a-5p** from the corresponding arylamines and acyl chloride. To a solution of arylamine (10 mmol) and triethylamine (1.66 mL, 12 mmol) in dichloromethane (20 mL), acyl chloride (1.1equiv) was added dropwise at 0 °C. After stirring at room temperature for 5 h, the reaction mixture was quenched with water and extracted by ethyl acetate for three times. The combined extracts were washed with brine and dried over Na<sub>2</sub>SO<sub>4</sub>. After removal of the solvent under reduced pressure, the residue was purified by recrystallization with petroleum ether/CH<sub>2</sub>Cl<sub>2</sub>, to obtain the desired products.

### III. Table S1. Screening of reaction conditions <sup>a</sup>

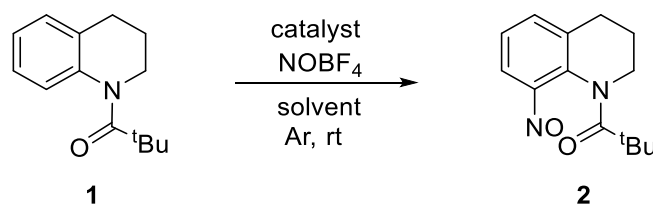

| Entry                 | Catalyst                | Solvent                                  | Yield (%) <sup>b</sup> |
|-----------------------|-------------------------|------------------------------------------|------------------------|
| 1                     | CuBr                    | CH <sub>3</sub> CN (2.0 mL)              | <5%                    |
| 2                     | CuCl                    | CH <sub>3</sub> CN (2.0 mL)              | <5%                    |
| 3                     | FeBr <sub>2</sub>       | CH <sub>3</sub> CN (2.0 mL)              | <5%                    |
| 4                     | AgNO <sub>3</sub>       | CH <sub>3</sub> CN (2.0 mL)              | 68%                    |
| 5                     | AgOTf                   | CH <sub>3</sub> CN (2.0 mL)              | 11%                    |
| 6                     | AgOAc                   | CH <sub>3</sub> CN (2.0 mL)              | 12%                    |
| 7                     | AgBF <sub>4</sub>       | CH <sub>3</sub> CN (2.0 mL)              | 43%                    |
| 8 <sup>c</sup>        | AgNO <sub>3</sub>       | CH <sub>3</sub> CN (2.0 mL)              | <5%                    |
| 9 <sup>d</sup>        | AgNO <sub>3</sub>       | CH <sub>3</sub> CN (2.0 mL)              | 20%                    |
| 10                    | AgNO <sub>3</sub>       | CH <sub>3</sub> CN (1.0 mL)              | 43%                    |
| 11                    | AgNO <sub>3</sub>       | CH <sub>3</sub> CN (3.0 mL)              | 60%                    |
| 12 <sup>e</sup>       | AgNO <sub>3</sub>       | CH <sub>3</sub> CN (2.0 mL)              | 69%                    |
| <b>13<sup>f</sup></b> | <b>AgNO<sub>3</sub></b> | <b>CH<sub>3</sub>CN (2.0 mL)</b>         | <b>71%</b>             |
| 14 <sup>f</sup>       | AgNO <sub>3</sub>       | DCE (2.0 mL)                             | <5%                    |
| 15 <sup>f</sup>       | AgNO <sub>3</sub>       | THF (2.0 mL)                             | <5%                    |
| 16 <sup>f</sup>       | AgNO <sub>3</sub>       | CH <sub>3</sub> NO <sub>2</sub> (2.0 mL) | 10%                    |



into a separatory funnel and sequentially washed with H<sub>2</sub>O and brine. The combined organic extracts dried over Na<sub>2</sub>SO<sub>4</sub> and concentrated. Purification of the crude product by flash column chromatography afforded the desired reduce product **11** (44mg, 80%).

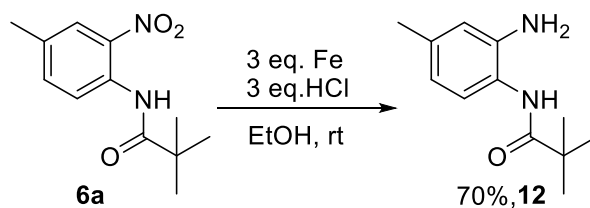

Under Ar atmosphere, substrate **6a** (0.3 mmol) and Fe powder (3 equiv.) were added to the reaction tube, 3mL EtOH was added, and finally HCl (3 equiv.) was slowly added under an ice water bath. The reaction was stirred for 4 h. The solution was transferred into a separatory funnel and sequentially washed with H<sub>2</sub>O and brine. The combined organic extracts dried over Na<sub>2</sub>SO<sub>4</sub> and concentrated. Purification of the crude product by flash column chromatography afforded the desired reduce product **12** (43mg, 70%).

## V. General Procedure for the synthesis of products **2, 4, 6, 7a, 8a, 9a**

Under Ar atmosphere, Substrate **1** (0.3 mmol) and 20%mmol silver nitrate were added to the reaction tube, and then 2.0 equiv. of NOBF<sub>4</sub> was dissolved in CH<sub>3</sub>CN (6 mL) and slowly added to the reaction tube at room temperature for one hour. After the reaction, the reaction system was quenched with water, extracted three times with ethyl acetate (3×10 mL), and dried with anhydrous sodium sulfate. Combined with the organic layer, the crude product was concentrated under reduced pressure and purified by silica gel column chromatography to give product **2**.

Under Ar atmosphere, substrate **3** (0.3 mmol) and 20%mmol silver nitrate were added to the reaction tube, and then 2.0 equiv. of NOBF<sub>4</sub> was dissolved in CH<sub>3</sub>CN (6 mL) and slowly added to the reaction tube at room temperature for one hour. After the reaction, the reaction system was quenched with water, extracted three times with ethyl acetate (3×10 mL), and dried with anhydrous sodium sulfate. Combined with the organic layer, the crude product was concentrated under reduced pressure and purified by silica gel column chromatography to give product **4**.

Under N<sub>2</sub> atmosphere, substrate **5** (0.3 mmol) and 20%mmol silver nitrate were added to the reaction tube, and then 2.0 equiv. of NOBF<sub>4</sub> was dissolved in CH<sub>3</sub>CN (6 mL) and slowly added to the reaction tube at room temperature for 1 hour. After the reaction was carried out in 40 °C for another 1 hour, the reaction system was quenched with water, extracted three times with ethyl acetate (3×10 mL), and dried with anhydrous sodium sulfate. Combined with the organic layer, the crude product was concentrated under reduced pressure and purified by silica gel column chromatography to give product **6, 7a, 8a, 9a**.

## VI. Scale-up experiment

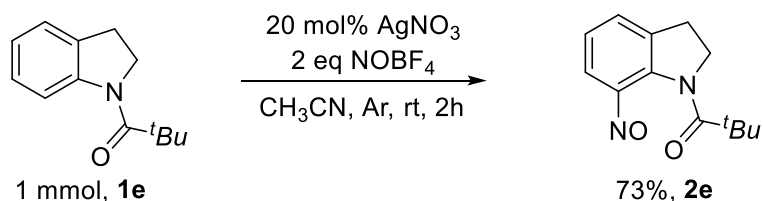

We carried out a scale-up experiment on the basis of the above reaction conditions, with substrate **1e** (1 mmol, 203 mg), silver nitrate (20 mol%, 34 mg), NOBF<sub>4</sub> (234 mg), solvent acetonitrile (10 mL) to explore the scale-up experiment. After the reaction, a 73% yield of target product **2e** (170 mg) was obtained.

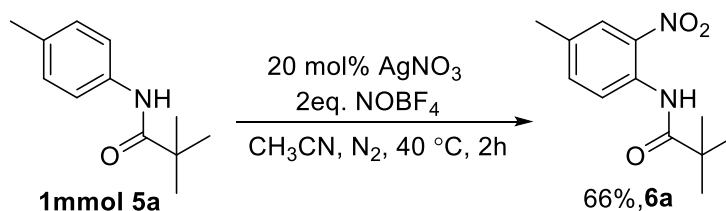

We also carried out a scale-up experiment on the basis of the above reaction conditions, with substrate **5a** (1 mmol, 191 mg), silver nitrate (20 mol%, 34 mg), NOBF<sub>4</sub> (234 mg), solvent acetonitrile (10 mL) to explore the scale-up experiment. After the reaction, a 66% yield of target product **6a** (157 mg) was obtained.

## VII. Control experiments

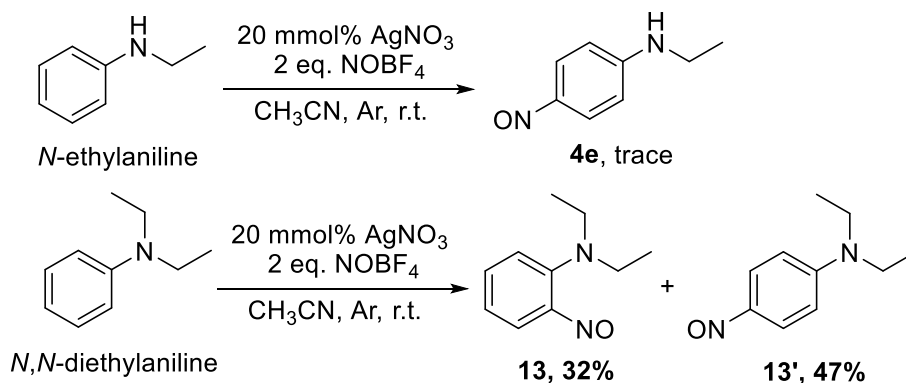

In order to insight into the possible mechanism, some control experiments were carried out. When substrate *N*-ethylaniline was submitted into the standard conditions, only trace amount of **4e** was observed. While, electron-rich substrate *N,N*-diethylaniline delivered *ortho*-substituted and *para*-substituted products **13** and **13'** in moderate yields.

## VIII. Date of products 2, 4, 6, 7a, 8a, 9a, 10, 11, 12, 13, 13'

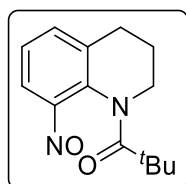

**2,2-dimethyl-1-(8-nitroso-3,4-dihydroquinolin-1(2H)-yl)propan-1-one, 2a**, 70%, M.P.= 90-92 °C, yellow solid.

<sup>1</sup>H NMR (400 MHz, CDCl<sub>3</sub>): 8.02 (d, *J*=2.8 Hz, 1H), 7.99 – 7.93 (m, 1H), 7.60 (d, *J*=9.2 Hz, 1H),

3.87 – 3.83 (m, 2H), 2.93 (t,  $J = 7.0$  Hz, 2H), 2.10 – 2.01 (m, 2H), 1.38 (s, 9H).  $^{13}\text{C}$  NMR (100 MHz,  $\text{CDCl}_3$ ): 178.85, 146.35, 143.59, 130.64, 126.14, 124.55, 120.74, 45.49, 40.41, 28.56, 26.38, 23.25. IR( $\text{cm}^{-1}$ ): 2930, 1659, 1583, 1515, 1479, 1400, 1337, 1279, 1261, 1153, 1109, 956, 924, 869, 801. HRMS (ESI)  $m/z$  calcd for  $\text{C}_{14}\text{H}_{19}\text{N}_2\text{O}_2^+$  ( $\text{M}+\text{H}$ ) $^+$  247.1441, found 247.1442.

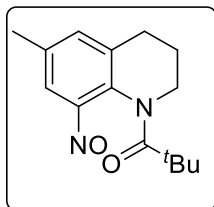

**2,2-dimethyl-1-(6-methyl-8-nitroso-3,4-dihydroquinolin-1(2H)-yl)propan-1-one, 2b**, 75%,  
M.P. = 126-128 °C, yellow solid.

$^1\text{H}$  NMR (400 MHz,  $\text{CDCl}_3$ ): 7.54 – 7.49 (m, 1H), 7.18 – 7.12 (m, 1H), 4.61 – 3.24 (m, 2H), 2.83 (t,  $J = 7.2$  Hz, 2H), 2.34 (s, 3H), 2.07 (s, 2H), 1.35 (s, 9H).  $^{13}\text{C}$  NMR (100MHz,  $\text{CDCl}_3$ ): 177.30, 145.01, 134.97, 134.32, 133.39, 131.23, 122.64, 44.65, 39.24, 27.93, 25.89, 23.92, 20.56. IR ( $\text{cm}^{-1}$ ): 2926, 1693, 1533, 1449, 1476, 1401, 1356, 1201, 1154, 1102, 978, 954, 869, 757, 580. HRMS (ESI)  $m/z$  calcd for  $\text{C}_{15}\text{H}_{21}\text{N}_2\text{O}_2^+$  ( $\text{M}+\text{H}$ ) $^+$  261.1598, found 261.1597.

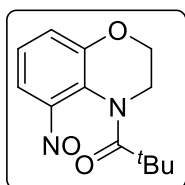

**2,2-dimethyl-1-(5-nitroso-2,3-dihydro-4H-benzo[b][1,4]oxazin-4-yl)propan-1-one, 2c**, 76%,  
M.P. = 127-129 °C, yellow solid.

$^1\text{H}$  NMR (400 MHz,  $\text{CDCl}_3$ ): 7.84 (d,  $J = 9.2$  Hz, 1H), 7.76 – 7.70 (m, 2H), 4.40 – 4.35 (m, 2H), 4.06 – 4.01 (m, 2H), 1.40 (s, 9H).  $^{13}\text{C}$  NMR (100MHz,  $\text{CDCl}_3$ ): 176.97, 146.46, 144.20, 132.71, 125.49, 115.07, 112.79, 66.08, 44.03, 40.05, 28.26. IR( $\text{cm}^{-1}$ ): 3072, 2968, 1667, 1609, 1588, 1518, 1492, 1388, 1338, 1319, 1290, 1251, 1170, 1083, 1054, 944, 900, 818, 765, 748, 722, 560. HRMS (ESI)  $m/z$  calcd for  $\text{C}_{13}\text{H}_{17}\text{N}_2\text{O}_3^+$  ( $\text{M}+\text{H}$ ) $^+$  249.1234, found 249.1235.

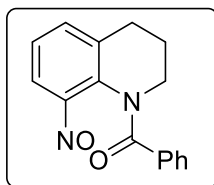

**(8-nitroso-3,4-dihydroquinolin-1(2H)-yl)(phenyl)methanone, 2d**, 60%, M.P. = 131-133 °C,  
white solid.

$^1\text{H}$  NMR (400 MHz,  $\text{CDCl}_3$ ): 8.06 (d,  $J = 2.7$  Hz, 1H), 7.76 (dd,  $J = 9.0, 2.7$  Hz, 1H), 7.51 – 7.30 (m, 5H), 6.98 (d,  $J = 9.0$  Hz, 1H), 3.93 (t,  $J = 6.3$  Hz, 2H), 2.96 (t,  $J = 6.6$  Hz, 2H), 2.09 (p,  $J = 6.5$  Hz, 2H).  $^{13}\text{C}$  NMR (100MHz,  $\text{CDCl}_3$ ): 170.87, 145.14, 143.53, 135.26, 131.19, 131.06, 128.55, 128.49, 125.14, 124.23, 121.23, 45.42, 27.24, 23.27. IR( $\text{cm}^{-1}$ ): 2922, 1653, 1611, 1583, 1546, 1513, 1490, 1331, 1280, 1195, 1179, 1131, 1076, 791, 723, 705. HRMS (ESI)  $m/z$  calcd for  $\text{C}_{16}\text{H}_{15}\text{N}_2\text{O}_2^+$  ( $\text{M}+\text{H}$ ) $^+$  267.1128, found 267.1129.

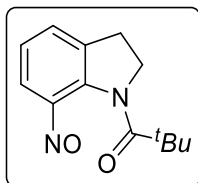

**2,2-dimethyl-1-(7-nitrosoindolin-1-yl)propan-1-one, 2e**, 83 %, M.P. = 114-116 °C, yellow solid.  
<sup>1</sup>H NMR (400 MHz, CDCl<sub>3</sub>): 8.31 (d, *J* = 9.0 Hz, 1H), 8.12 – 8.08 (m, 1H), 8.03 (d, *J* = 2.4 Hz, 1H), 4.37 (t, *J* = 8.4 Hz, 2H), 3.27 – 3.21 (m, 2H), 1.40 (s, 9H). <sup>13</sup>C NMR (100 MHz, CDCl<sub>3</sub>): 177.44, 150.36, 143.37, 131.97, 124.30, 119.80, 117.48, 50.09, 40.53, 28.55, 27.47. IR(cm<sup>-1</sup>): 2977, 2934, 1650, 1596, 1515, 1476, 1446, 1403, 1370, 1339, 1248, 1159, 1089, 936, 903, 831, 751, 615. HRMS (ESI) *m/z* calcd for C<sub>13</sub>H<sub>17</sub>N<sub>2</sub>O<sub>2</sub><sup>+</sup> (M+H)<sup>+</sup> 233.1285, found 233.1286.

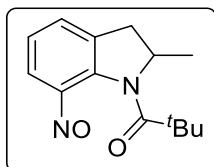

**2,2-dimethyl-1-(2-methyl-7-nitrosoindolin-1-yl)propan-1-one, 2f**, 71%, oil.  
<sup>1</sup>H NMR (400 MHz, CDCl<sub>3</sub>): 8.22 (d, *J* = 8.9 Hz, 1H), 8.12 (dd, *J* = 8.8, 2.9 Hz, 1H), 8.09 (s, 1H), 5.08 – 4.92 (m, 1H), 3.39 (dd, *J* = 15.5, 7.8 Hz, 1H), 2.74 (d, *J* = 15.5 Hz, 1H), 1.41 (s, 9H), 1.31 (d, *J* = 6.3 Hz, 3H). <sup>13</sup>C NMR (100MHz, CDCl<sub>3</sub>): 177.16, 148.88, 143.57, 131.81, 124.09, 120.39, 118.39, 57.04, 40.95, 36.22, 28.21, 21.85. IR(cm<sup>-1</sup>): 2971, 1657, 1598, 1514, 1497, 1379, 1324, 1297, 1250, 1191, 1159, 1065, 992, 861, 754. HRMS (ESI) *m/z* calcd for C<sub>14</sub>H<sub>19</sub>N<sub>2</sub>O<sub>2</sub><sup>+</sup> (M+H)<sup>+</sup> 247.1441, found 247.1442.

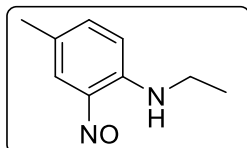

**N-ethyl-4-methyl-2-nitrosoaniline, 4a**, 61 %, M.P. = 109-111 °C, yellow solid.  
<sup>1</sup>H NMR (400 MHz, CDCl<sub>3</sub>): 7.9 – 7.9 (m, 1H), 7.8 (s, 1H), 7.2 (dd, *J* = 8.8, 2.3 Hz, 1H), 6.7 (d, *J* = 8.7 Hz, 1H), 3.3 – 3.2 (m, 2H), 2.2 (s, 3H), 1.3 (t, *J* = 7.3 Hz, 3H). <sup>13</sup>C NMR (100MHz, CDCl<sub>3</sub>): 142.78, 136.72, 130.35, 125.03, 123.59, 112.73, 36.68, 18.91, 13.42. IR(cm<sup>-1</sup>): 3382, 2958, 2922, 2853, 1631, 1568, 1525, 1477, 1425, 1406, 1347, 1272, 1233, 1166, 1076, 966, 913, 801, 765, 529. HRMS (ESI) *m/z* calcd for C<sub>9</sub>H<sub>12</sub>N<sub>2</sub>O<sup>+</sup> (M+H)<sup>+</sup> 165.1028, found 165.1025.

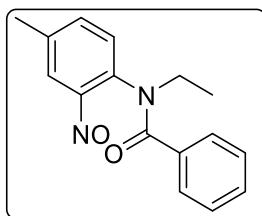

**N-ethyl-N-(4-methyl-2-nitrosophenyl)benzamide, 4b**, 80%, oil.  
<sup>1</sup>H NMR (400 MHz, CDCl<sub>3</sub>): δ 7.88 – 7.08 (m, 8H), 3.91 (m, 2H), 2.36 (s, 3H), 1.23 (s, 3H). <sup>13</sup>C NMR (100MHz, CDCl<sub>3</sub>): 169.51, 145.75, 139.01, 135.67, 134.52, 131.60, 129.82, 127.91, 125.93, 45.38, 20.81, 12.79. IR(cm<sup>-1</sup>): 3058, 2976, 2933, 2872, 1651, 1615, 1600, 1567, 1530, 1498, 1445,



1384, 1350, 1309, 1146, 1122, 1082, 1033, 831, 803, 788, 761, 725, 699, 673, 632, 588. HRMS (ESI)  $m/z$  calcd for  $C_{16}H_{17}N_2O_2^+$  ( $M+H$ ) $^+$  269.1285, found 269.1286.

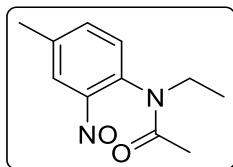

**N-ethyl-N-(4-methyl-2-nitrosophenyl)acetamide, 4c**, 56%, oil.

$^1H$  NMR (400 MHz,  $CDCl_3$ ): 7.80 (d,  $J = 2.1$  Hz, 1H), 7.51 (d,  $J = 8.2$  Hz, 1H), 7.23 (d,  $J = 8.1$  Hz, 1H), 3.98 – 3.34 (m, 2H), 2.50 (s, 3H), 1.83 (s, 3H), 1.07 (t,  $J = 7.2$  Hz, 3H).  $^{13}C$  NMR (100MHz,  $CDCl_3$ ): 169.87, 146.94, 140.36, 134.70, 133.32, 131.58, 125.80, 43.90, 22.55, 20.95, 12.87. IR( $cm^{-1}$ ): 2976, 2933, 1670, 1615, 1532, 1532, 1500, 1442, 1395, 1442, 1395, 1353, 1299, 1142, 1107, 1069, 835, 803, 564. HRMS (ESI)  $m/z$  calcd for  $C_{11}H_{15}N_2O_2^+$  ( $M+H$ ) $^+$  207.1128, found 207.1129.

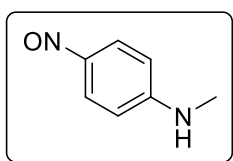

**N-methyl-4-nitrosoaniline, 4d**, 59 %, M.P. = 94-96 °C, yellow solid. CAS:10595-51-4<sup>[2]</sup>

$^1H$  NMR (400 MHz,  $CDCl_3$ ):  $\delta$  8.31 – 8.26 (m, 2H), 7.72 – 7.67 (m, 2H), 3.40 (s, 3H).  $^{13}C$  NMR (100 MHz,  $CDCl_3$ ):  $\delta$  147.05, 145.94, 125.27, 117.85, 30.06. IR ( $cm^{-1}$ ): 3380, 2986, 2899, 1607, 1594, 1514, 1467, 1403, 1399, 1193, 1180, 1075, 939, 855, 813, 750.

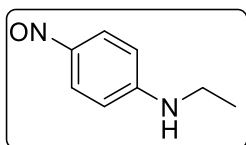

**N-ethyl-4-nitrosoaniline, 4e**, 70 %, M.P. = 98-101 °C, yellow solid.

$^1H$  NMR (400 MHz,  $CDCl_3$ ):  $\delta$  8.08 (d,  $J = 9.2$  Hz, 2H), 6.51 (d,  $J = 9.2$  Hz, 2H), 3.26 (q,  $J = 7.2$  Hz, 2H), 1.30 (d,  $J = 8.1$  Hz, 3H).  $^{13}C$  NMR (100 MHz,  $CDCl_3$ ):  $\delta$  142.78, 136.72, 130.35, 125.03, 123.59, 112.73, 36.68, 18.91, 13.42. IR( $cm^{-1}$ ): 3368, 2955, 2924, 2852, 1600, 1525, 1499, 1466, 1319, 1304, 1183, 1108, 995, 831, 752. HRMS (ESI)  $m/z$  calcd for  $C_8H_{11}N_2O^+$  ( $M+H$ ) $^+$  151.0866, found 151.0866.

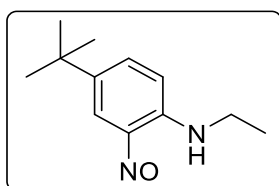

**4-(tert-butyl)-N-ethyl-2-nitrosoaniline, 4f**, 56%, M.P. = 83-86 °C, yellow solid

$^1H$  NMR (400 MHz,  $CDCl_3$ ): 8.07 (d,  $J = 2.4$  Hz, 1H), 7.83 (s, 1H), 7.44 (dd,  $J = 9.0, 2.4$  Hz, 1H), 6.74 (d,  $J = 9.1$  Hz, 1H), 3.28 (dd,  $J = 7.2, 5.1$  Hz, 2H), 1.28 (d,  $J = 7.2$  Hz, 3H), 1.22 (s, 9H).  $^{13}C$  NMR (100MHz,  $CDCl_3$ ): 143.70, 138.31, 134.38, 131.19, 122.50, 113.68, 37.69, 33.90, 31.05, 14.49. IR( $cm^{-1}$ ): 3383, 2962, 2868, 1631, 1564, 1521, 1477, 1425, 1404, 1362, 1348, 1280, 1256, 1234, 1204, 1172, 1135, 1116, 1075, 922, 896, 806, 765, 518. HRMS (ESI)  $m/z$  calcd for  $C_{12}H_{19}N_2O^+$  ( $M+H$ ) $^+$  207.1492, found 207.1493.

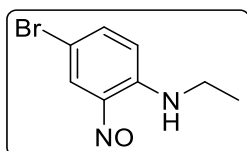

**4-bromo-N-ethyl-2-nitrosoaniline, 4g**, 42%, M.P. = 85-88°C, yellow solid

$^1\text{H}$  NMR (400 MHz,  $\text{CDCl}_3$ ): 8.31 (d,  $J = 2.4$  Hz, 1H), 7.94 (s, 1H), 7.49 (dd,  $J = 9.2, 2.4$  Hz, 1H), 6.76 (d,  $J = 9.2$  Hz, 1H), 3.37 – 3.31 (m, 2H), 1.37 (t,  $J = 7.2$  Hz, 3H).  $^{13}\text{C}$  NMR (100MHz,  $\text{CDCl}_3$ ): 144.37, 138.91, 132.14, 128.94, 115.48, 106.22, 37.84, 14.28. IR( $\text{cm}^{-1}$ ): 3374, 2976, 2912, 2879, 1616, 1560, 1501, 1469, 1450, 1421, 1387, 1346, 1299, 1262, 1233, 1158, 1073, 882, 873, 810, 758, 519. HRMS (ESI)  $m/z$  calcd for  $\text{C}_8\text{H}_{10}\text{BrN}_2\text{O}^+$  (M+H) $^+$  228.9971, found 228.9970.

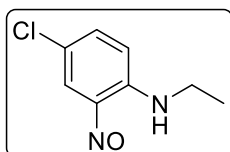

**4-chloro-N-ethyl-2-nitrosoaniline, 4h**, 40%, M.P. = 84-88 °C, yellow solid

$^1\text{H}$  NMR (400 MHz,  $\text{CDCl}_3$ ): 8.08 (d,  $J = 2.6$  Hz, 1H), 7.86 (s, 1H), 7.30 (dd,  $J = 9.2, 2.6$  Hz, 1H), 6.73 (d,  $J = 9.2$  Hz, 1H), 3.31 – 3.22 (m, 2H), 1.30 (t,  $J = 7.2$  Hz, 3H).  $^{13}\text{C}$  NMR (100MHz,  $\text{CDCl}_3$ ): 144.37, 138.91, 132.14, 128.94, 115.48, 106.22, 37.84, 14.28. IR ( $\text{cm}^{-1}$ ): 3372, 3093, 2923, 1617, 1563, 1511, 1471, 1451, 1404, 1382, 1348, 1260, 1235, 1157, 1134, 1095, 1022, 881, 812, 759, 653, 519. HRMS (ESI)  $m/z$  calcd for  $\text{C}_8\text{H}_{10}\text{ClN}_2\text{O}^+$  (M+H) $^+$  185.0476, found 185.0477.

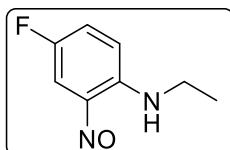

**4-fluoro-N-ethyl-2-nitrosoaniline, 4i**, 42%, M.P. = 55-59 °C yellow solid

$^1\text{H}$  NMR (400 MHz,  $\text{CDCl}_3$ ):  $\delta$  7.80 (d,  $J = 3.1$  Hz, 1H), 7.77 (d,  $J = 3.1$  Hz, 1H), 7.20 – 7.13 (m, 1H), 6.74 (dd,  $J = 9.5, 4.5$  Hz, 1H), 3.26 (dd,  $J = 7.2, 5.1$  Hz, 2H), 1.29 (t,  $J = 7.2$  Hz, 3H).  $^{13}\text{C}$  NMR (100MHz,  $\text{CDCl}_3$ ): 152.47, 150.11, 141.65, 124.09, 123.86, 114.05, 113.98, 110.99, 110.73, 36.95, 13.34.  $^{19}\text{F}$  NMR (376MHz,  $\text{CDCl}_3$ ): -128.56. IR ( $\text{cm}^{-1}$ ): 3378, 2982, 2871, 1617, 1580, 1521, 1508, 1478, 1449, 1410, 1349, 1296, 1269, 1238, 1184, 1148, 1120, 1051, 946, 926, 876, 830, 801, 783, 758, 677, 493. HRMS (ESI)  $m/z$  calcd for  $\text{C}_8\text{H}_{10}\text{FN}_2\text{O}^+$  (M+H) $^+$  169.0772, found 169.0771.

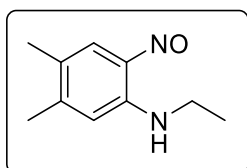

**N-ethyl-4,5-dimethyl-2-nitrosoaniline, 4j**, 40%. M.P. = 66-69 °C, yellow solid

$^1\text{H}$  NMR (400 MHz,  $\text{CDCl}_3$ ):  $\delta$  7.84 (s, 1H), 7.80 (s, 1H), 6.54 (s, 1H), 3.25 (dd,  $J = 7.2, 5.1$  Hz, 2H), 2.19 (s, 3H), 2.10 (s, 3H), 1.28 (s, 3H).  $^{13}\text{C}$  (100 MHz,  $\text{CDCl}_3$ ): 146.22, 143.15, 125.41, 113.21, 113.07, 36.65, 19.70, 17.51, 13.45. IR( $\text{cm}^{-1}$ ): 3375, 2967, 2922, 1630, 1571, 1504, 1407, 1385, 1428, 1332, 1300, 1270, 1238, 1197, 1157, 1074, 1038, 763. HRMS (ESI)  $m/z$  calcd for  $\text{C}_{10}\text{H}_{15}\text{N}_2\text{O}^+$  (M+H) $^+$  179.1179, found 179.1179.

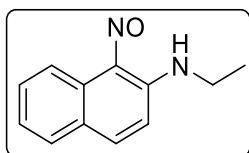

**N-ethyl-1-nitrosonaphthalen-2-amine, 4k**, 44% M.P. = 84-87°C, yellow solid. CAS: 76145-81-3<sup>[3]</sup>

<sup>1</sup>H NMR (400 MHz, CDCl<sub>3</sub>): δ 8.69 (d, *J* = 7.8 Hz, 2H), 7.71 (d, *J* = 9.3 Hz, 1H), 7.58 (d, *J* = 6.4 Hz, 1H), 7.55 – 7.49 (m, 1H), 7.25 (t, *J* = 8.0 Hz, 1H), 6.97 (d, *J* = 9.4 Hz, 1H), 3.41 (q, *J* = 7.2 Hz, 2H), 1.33 (t, *J* = 7.2 Hz, 3H). <sup>13</sup>C NMR (100MHz, CDCl<sub>3</sub>): 146.55, 137.23, 130.18, 128.93, 128.73, 126.37, 123.88, 123.25, 124.01, 38.24, 14.70. IR (cm<sup>-1</sup>): 2970, 2926, 2874, 1633, 1560, 1518, 1481, 1470, 1438, 1416, 1378, 1356, 1322, 1303, 1206, 964, 798, 778, 754, 655, 604, 491.

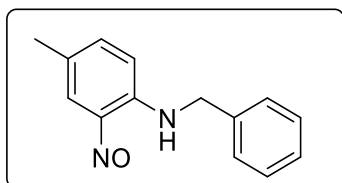

**N-benzyl-4-methyl-2-nitrosoaniline, 4l**, 56%, M.P. = 88-90°C, yellow solid

<sup>1</sup>H NMR (400 MHz, CDCl<sub>3</sub>): δ 8.24 (s, 1H), 7.92 (s, 1H), 7.27 (d, *J* = 6.7 Hz, 5H), 7.13 (dd, *J* = 8.7, 2.2 Hz, 1H), 6.65 (d, *J* = 8.7 Hz, 1H), 4.45 (d, *J* = 5.7 Hz, 2H), 2.17 (s, 3H). <sup>13</sup>C NMR (100 MHz, CDCl<sub>3</sub>): δ 143.51, 137.70, 137.64, 131.94, 128.90, 127.62, 127.02, 126.12, 125.31, 114.22, 47.14, 19.96. IR (cm<sup>-1</sup>): 3400, 2919, 2849, 1632, 1568, 1522, 1495, 1452, 1424, 1399, 1348, 1320, 1303, 1271, 1229, 1195, 1154, 1055, 809, 764, 726, 696, 581, 531. HRMS (ESI) *m/z* calcd for C<sub>14</sub>H<sub>15</sub>N<sub>2</sub>O<sup>+</sup> (M+H)<sup>+</sup> 227.1179, found 227.1180.

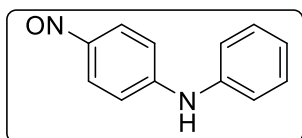

**4-nitroso-N-phenylaniline, 4m**, 71%, oil. CAS:156-10-5<sup>[1]</sup>

<sup>1</sup>H NMR (400 MHz, CDCl<sub>3</sub>): δ 8.12 (d, *J* = 9.2 Hz, 2H), 7.41 – 7.34 (m, 2H), 7.21 (dd, *J* = 21.8, 14.4 Hz, 3H), 6.97 – 6.91 (m, 2H), 6.30 (s, 1H). <sup>13</sup>C NMR (100 MHz, CDCl<sub>3</sub>): δ 150.22, 139.55, 129.75, 126.23, 124.68, 121.95, 113.71. IR (cm<sup>-1</sup>): 3341, 2971, 2899, 1603, 1584, 1540, 1495, 1405, 1303, 1249, 1185, 1076, 1065, 1049, 879, 841, 747, 690, 565, 496.

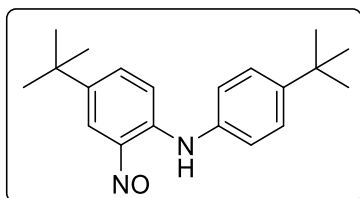

**4-(tert-butyl)-N-(4-(tert-butyl)phenyl)-2-nitrosoaniline, 4n**, 42%, oil

<sup>1</sup>H NMR (400 MHz, CDCl<sub>3</sub>): δ 9.30 (s, 1H), 8.09 (d, *J* = 2.4 Hz, 1H), 7.36 – 7.31 (m, 3H), 7.11 (dd, *J* = 8.8, 2.8 Hz, 3H), 1.25 (d, *J* = 15.8 Hz, 18H). <sup>13</sup>C NMR (100 MHz, CDCl<sub>3</sub>): δ 148.55, 141.39, 140.60, 136.31, 133.70, 132.56, 126.51, 123.94, 122.28, 116.14, 34.53, 34.08, 31.39, 31.02. IR (cm<sup>-1</sup>): 3356, 2960, 2866, 1629, 1607, 1564, 1520, 1464, 1435, 1407, 1364, 1345, 1256, 1227, 1203, 1159, 1113, 1076, 828, 554. HRMS (ESI) *m/z* calcd for C<sub>20</sub>H<sub>27</sub>N<sub>2</sub>O<sup>+</sup> (M+H)<sup>+</sup> 311.2118, found 311.2117.

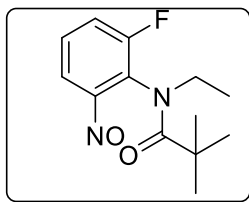

**N-ethyl-N-(2-fluoro-6-nitrosophenyl)pivalamide, 4o**, 15%, M.P. = 60-63 °C, yellow solid.  
<sup>1</sup>H NMR (400 MHz, CDCl<sub>3</sub>): 8.05 – 7.96 (m, 2H), 7.39 – 7.33 (m, 1H), 3.62 (q, *J* = 7.1 Hz, 2H), 1.04 (s, 12H). <sup>13</sup>C NMR (100MHz, CDCl<sub>3</sub>): 177.34, 159.63, 157.10, 137.77, 137.64, 132.17, 119.59, 112.76, 112.76, 112.50, 46.90, 40.94, 28.61, 12.83. <sup>19</sup>F NMR (376MHz, CDCl<sub>3</sub>): -112.99. IR (cm<sup>-1</sup>): 2969, 1649, 1601, 1530, 1497, 1480, 1397, 1351, 1284, 1199, 1117, 1131, 1073, 1021, 883, 809, 745, 731. HRMS (ESI) *m/z* calcd for C<sub>13</sub>H<sub>18</sub>FN<sub>2</sub>O<sub>2</sub><sup>+</sup> (M+H)<sup>+</sup> 253.1347, found 253.1348.

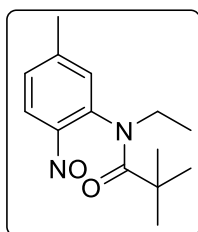

**N-ethyl-N-(5-methyl-2-nitrosophenyl)pivalamide, 4p**, 31%, M.P.= 86-89 °C, yellow solid  
<sup>1</sup>H NMR (400 MHz, CDCl<sub>3</sub>): 8.17 (d, *J* = 2.7 Hz, 1H), 8.08 (dd, *J* = 8.6, 2.7 Hz, 1H), 7.29 – 7.25 (m, 1H), 3.60 (m, 2H), 2.36 (s, 3H), 1.13 (t, *J* = 7.0 Hz, 3H), 1.07 (s, 9H). <sup>13</sup>C NMR (100MHz, CDCl<sub>3</sub>): 177.12, 148.07, 146.99, 138.45, 131.43, 126.33, 121.51, 46.10, 40.92, 28.88, 18.22, 12.51. IR(cm<sup>-1</sup>): 2968, 2933, 1638, 1611, 1582, 1522, 1480, 1381, 1289, 1203, 1121, 1090, 802. HRMS (ESI) *m/z* calcd for C<sub>16</sub>H<sub>17</sub>N<sub>2</sub>O<sub>2</sub><sup>+</sup> (M+H)<sup>+</sup> 249.1598, found 249.1597.

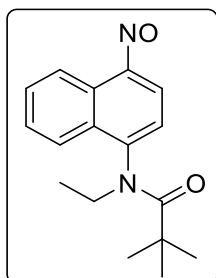

**N-ethyl-N-(4-nitrosophthalen-1-yl)pivalamide, 4q**, 70%, M.P. = 106-109°C, yellow solid.  
<sup>1</sup>H NMR (400 MHz, CDCl<sub>3</sub>): 8.58 (d, *J* = 9.0 Hz, 1H), 8.23 (d, *J* = 8.0 Hz, 1H), 8.01 (d, *J* = 7.6 Hz, 1H), 7.76 (dd, *J* = 14.7, 8.5 Hz, 2H), 7.44 (d, *J* = 8.0 Hz, 1H), 3.74 (m, 2H), 1.19 (t, *J* = 7.0 Hz, 3H), 0.99 (s, 9H). <sup>13</sup>C NMR (100MHz, CDCl<sub>3</sub>): 117.87, 146.34, 145.23, 132.06, 129.87, 128.55, 126.36, 125.69, 124.20, 123.86, 123.14, 47.38, 41.33, 29.23, 12.98. IR(cm<sup>-1</sup>): 2968, 2933, 1641, 1597, 1572, 1522, 1507, 1479, 1459, 1421, 1398, 1364, 1343, 1286, 1266, 1201, 1171, 1147, 1122, 1071, 886, 815, 770. HRMS (ESI) *m/z* calcd for C<sub>17</sub>H<sub>21</sub>N<sub>2</sub>O<sub>2</sub><sup>+</sup> (M+H)<sup>+</sup> 285.1598, found 285.1597.

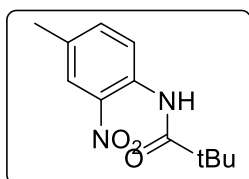

**N-(4-methyl-2-nitrophenyl)pivalamide, 6a**, 77%, M.P. = 58-60 °C, yellow solid.

$^1\text{H}$  NMR (400 MHz,  $\text{CDCl}_3$ )  $\delta$  10.53 (s, 1H), 8.61 (d,  $J = 8.7$  Hz, 1H), 7.94 (s, 1H), 7.38 (s, 1H), 2.31 (s, 3H), 1.27 (s, 9H).  $^{13}\text{C}$  NMR (100 MHz,  $\text{CDCl}_3$ )  $\delta$  177.74, 136.86, 136.24, 133.18, 133.03, 125.49, 122.07, 40.49, 27.47, 20.49. IR( $\text{cm}^{-1}$ ): 3373, 2962, 2926, 2870, 1694, 1626, 1578, 1513, 1477, 1441, 1398, 1342, 1302, 1274, 1147, 1081, 1028, 935, 833, 807, 760, 677, 536 HRMS (ESI)  $m/z$  calcd for  $\text{C}_{12}\text{H}_{17}\text{N}_2\text{O}_3^+$  ( $\text{M}+\text{H}$ ) $^+$  237.1239, found 237.1232

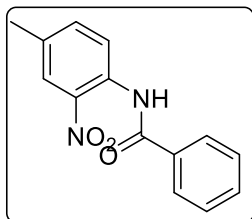

**N-(4-methyl-2-nitrophenyl)benzamide, 7a**, 80%, M.P. = 136-138 °C, yellow solid.

$^1\text{H}$  NMR (400 MHz,  $\text{CDCl}_3$ )  $\delta$  11.22 (s, 1H), 8.86 (d,  $J = 8.6$  Hz, 1H), 8.06 (s, 1H), 7.98 (d,  $J = 7.0$  Hz, 2H), 7.59 – 7.50 (m, 4H), 2.41 (s, 3H).  $^{13}\text{C}$  NMR (100 MHz,  $\text{CDCl}_3$ )  $\delta$  165.64, 137.07, 136.38, 134.18, 133.62, 132.96, 132.53, 129.01, 127.33, 125.68, 122.08, 20.58. IR( $\text{cm}^{-1}$ ): 3355, 2986, 2899, 1688, 1580, 1521, 1450, 1405, 1381, 1250, 1221, 1065, 1056, 925, 891, 834, 758, 682, 640, 534. HRMS (ESI)  $m/z$  calcd for  $\text{C}_{14}\text{H}_{13}\text{N}_2\text{O}_3^+$  ( $\text{M}+\text{H}$ ) $^+$  257.0926, found 257.0923

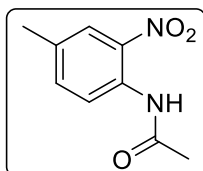

**N-(4-methyl-2-nitrophenyl)acetamide, 8a**, 65%, M.P. = 85-87 °C, yellow solid.

$^1\text{H}$  NMR (400 MHz,  $\text{CDCl}_3$ )  $\delta$  10.19 (s, 1H), 8.62 (d,  $J = 8.7$  Hz, 1H), 8.00 (s, 1H), 7.45 (d,  $J = 8.7$  Hz, 1H), 2.38 (s, 3H), 2.27 (s, 3H).  $^{13}\text{C}$  NMR (100 MHz,  $\text{CDCl}_3$ )  $\delta$  168.90, 136.80, 136.28, 133.49, 132.44, 125.46, 122.18, 25.51, 20.51. IR( $\text{cm}^{-1}$ ): 3363, 2987, 2899, 1708, 1617, 1576, 1512, 1481, 1407, 1381, 1303, 1271, 1228, 1075, 849, 825, 759, 590, 530. HRMS (ESI)  $m/z$  calcd for  $\text{C}_9\text{H}_{11}\text{N}_2\text{O}_3^+$  ( $\text{M}+\text{H}$ ) $^+$  195.0770, found 195.0764.

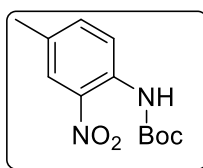

**tert-butyl (4-methyl-2-nitrophenyl)carbamate, 9a**, 37%, M.P. = 66-69°C, yellow solid, CAS: 866005-25-6.

$^1\text{H}$  NMR (400 MHz,  $\text{CDCl}_3$ )  $\delta$  9.45 (s, 1H), 8.33 (d,  $J = 8.7$  Hz, 1H), 7.90 (s, 1H), 7.33 (d,  $J = 8.7$  Hz, 1H), 2.28 (s, 3H), 1.46 (s, 9H).  $^{13}\text{C}$  NMR (100 MHz,  $\text{CDCl}_3$ )  $\delta$  151.30, 135.65, 134.88, 132.49, 130.93, 124.48, 119.68, 80.57, 27.20, 19.32. IR( $\text{cm}^{-1}$ ): 3374, 2978, 2927, 1736, 1629, 1576, 1521, 1442, 1393, 1367, 1340, 1303, 1277, 1250, 1222, 1145, 1086, 1048, 919, 899, 828, 761, 736, 675, 536.

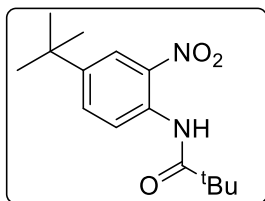

**N-(4-(tert-butyl)-2-nitrophenyl)pivalamide, 6b**, 75%, M.P. = 42-44 °C, yellow solid.

$^1\text{H NMR}$  (400 MHz,  $\text{CDCl}_3$ )  $\delta$  10.55 (s, 1H), 8.64 (d,  $J = 8.9$  Hz, 1H), 8.12 (d,  $J = 2.4$  Hz, 1H), 7.59 (s, 1H), 1.27 (d,  $J = 5.4$  Hz, 18H).  $^{13}\text{C NMR}$  (100 MHz,  $\text{CDCl}_3$ )  $\delta$  176.76, 145.65, 135.20, 132.44, 131.92, 121.02, 120.96, 39.46, 33.53, 29.96, 26.45. IR( $\text{cm}^{-1}$ ): 3373, 2964, 1699, 1622, 1579, 1534, 1510, 1477, 1442, 1394, 1338, 1281, 1263, 1232, 1148, 1076, 928, 896, 841, 762, 587. HRMS (ESI)  $m/z$  calcd for  $\text{C}_{15}\text{H}_{23}\text{N}_2\text{O}_3^+$  ( $\text{M}+\text{H}$ ) $^+$  279.1709, found 279.1701

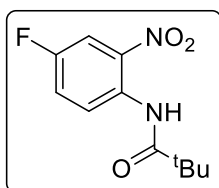

**N-(4-fluoro-2-nitrophenyl)pivalamide, 6c**, 53%, M.P. = 52-55°C, yellow solid.

$^1\text{H NMR}$  (400 MHz,  $\text{CDCl}_3$ )  $\delta$  10.60 (s, 1H), 8.89 – 8.85 (m, 1H), 7.94 (dd,  $J = 8.5, 3.1$  Hz, 1H), 7.43 – 7.38 (m, 1H), 1.36 (s, 9H).  $^{13}\text{C NMR}$  (100 MHz,  $\text{CDCl}_3$ )  $\delta$  177.79, 158.06, 155.60, 132.04, 124.06, 123.99, 123.59, 123.37, 112.35, 112.08, 40.53, 27.24.  $^{19}\text{F NMR}$  (376MHz,  $\text{CDCl}_3$ ): -116.50. IR( $\text{cm}^{-1}$ ): 3376, 2969, 2899, 1695, 1591, 1511, 1478, 1451, 1403, 1393, 1355, 1288, 1266, 1143, 1065, 1057, 1027, 948, 878, 832, 810, 787. HRMS (ESI)  $m/z$  calcd for  $\text{C}_{11}\text{H}_{14}\text{FN}_2\text{O}_3^+$  ( $\text{M}+\text{H}$ ) $^+$  241.0988, found 241.0982.

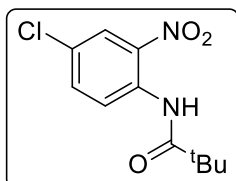

**N-(4-chloro-2-nitrophenyl)pivalamide, 6d**, 52%, M.P. = 61-63°C, yellow solid.

$^1\text{H NMR}$  (400 MHz,  $\text{CDCl}_3$ )  $\delta$  10.59 (s, 1H), 8.76 (d,  $J = 9.2$  Hz, 1H), 8.13 (s, 1H), 7.52 (d,  $J = 6.6$  Hz, 1H), 1.28 (s, 9H).  $^{13}\text{C NMR}$  (100 MHz,  $\text{CDCl}_3$ )  $\delta$  176.80, 135.40, 134.88, 133.12, 127.05, 124.28, 122.35, 39.61, 26.38. IR( $\text{cm}^{-1}$ ): 3372, 2966, 1700, 1610, 1578, 1542, 1493, 1441, 1367, 1339, 1262, 1149, 1107, 1073, 925, 886, 832, 761, 728, 657, 533. HRMS (ESI)  $m/z$  calcd for  $\text{C}_{11}\text{H}_{14}\text{ClN}_2\text{O}_3^+$  ( $\text{M}+\text{H}$ ) $^+$  257.0693, found 241.0687.

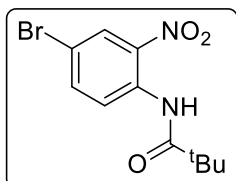

**N-(4-bromo-2-nitrophenyl)pivalamide, 6e**, 54%, M.P. = 74-76°C, yellow solid.

$^1\text{H NMR}$  (400 MHz,  $\text{CDCl}_3$ )  $\delta$  10.68 (s, 1H), 8.79 (d,  $J = 9.1$  Hz, 1H), 8.37 (s, 1H), 7.74 (d,  $J = 6.8$  Hz, 1H), 1.36 (s, 9H).  $^{13}\text{C NMR}$  (100 MHz,  $\text{CDCl}_3$ )  $\delta$  177.85, 138.77, 136.59, 134.57, 128.23, 123.56, 114.96, 40.66, 27.39. IR( $\text{cm}^{-1}$ ): 3371, 2969, 2900, 1700, 1606, 1576, 1492, 1441, 1393,

1336, 1261, 1149, 1075, 1065, 1056, 923, 877. HRMS (ESI)  $m/z$  calcd for  $C_{11}H_{14}BrN_2O_3^+$  (M+H)<sup>+</sup> 301.0188, found 301.0181.

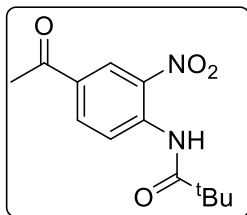

**N-(4-acetyl-2-nitrophenyl)pivalamide, 6f**, 38%, M.P. = 87-89°C, yellow solid.

<sup>1</sup>H NMR (400 MHz, CDCl<sub>3</sub>) δ 10.95 (s, 1H), 8.99 (d,  $J$  = 8.9 Hz, 1H), 8.83 (s, 1H), 8.21 (d,  $J$  = 6.8 Hz, 1H), 2.64 (s, 3H), 1.38 (s, 9H). <sup>13</sup>C NMR (100 MHz, CDCl<sub>3</sub>) δ 194.79, 178.09, 138.98, 135.65, 135.20, 131.47, 126.34, 121.79, 40.85, 27.38, 26.35. IR (cm<sup>-1</sup>): 3364, 2963, 1690, 1615, 1577, 1512, 1477, 1443, 1398, 1358, 1340, 1283, 1260, 1220, 1188, 1138, 1080, 1026, 974, 924, 844, 763, 596. HRMS (ESI)  $m/z$  calcd for  $C_{13}H_{17}N_2O_4^+$  (M+H)<sup>+</sup> 265.1183, found 265.1181.

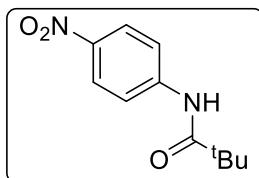

**N-(4-nitrophenyl)pivalamide, 6g**, 55%, M.P. = 72-76 °C, oil, CAS: 56619-95-5.

<sup>1</sup>H NMR (400 MHz, CDCl<sub>3</sub>) δ 10.73 (s, 1H), 8.83 (d,  $J$  = 10.0 Hz, 1H), 8.23 (d,  $J$  = 6.8 Hz, 1H), 7.65 (d,  $J$  = 14.2 Hz, 1H), 7.17 (d,  $J$  = 14.3 Hz, 1H), 1.36 (s, 9H). <sup>13</sup>C NMR (100 MHz, CDCl<sub>3</sub>) δ 177.88, 136.36, 135.99, 135.45, 125.76, 122.95, 122.12, 40.59, 27.45. IR (cm<sup>-1</sup>): 3370, 2968, 2900, 1700, 1608, 1585, 1499, 1451, 1429, 1393, 1337, 1272, 1229, 1147, 1065, 1056, 741.

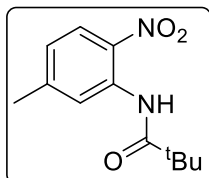

**N-(5-methyl-2-nitrophenyl)pivalamide, 6h**, 40%, M.P. = 71-74°C, yellow solid, CAS: 1707681-15-9.

<sup>1</sup>H NMR (400 MHz, CDCl<sub>3</sub>) δ 10.81 (s, 1H), 8.69 (s, 1H), 8.13 (d,  $J$  = 8.6 Hz, 1H), 6.96 (d,  $J$  = 8.7 Hz, 1H), 2.43 (s, 3H), 1.36 (s, 9H). <sup>13</sup>C NMR (100 MHz, CDCl<sub>3</sub>) δ 178.04, 148.04, 135.40, 134.24, 125.80, 123.95, 122.00, 40.61, 27.45, 22.09. IR (cm<sup>-1</sup>): 3348, 2973, 2899, 1703, 1615, 1588, 1495, 1480, 1447, 1407, 1393, 1381, 1323, 1262, 1229, 1158, 1073, 1065, 1056, 885, 815, 750.

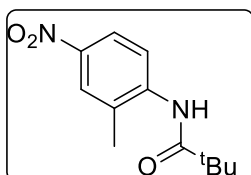

**N-(2-methyl-4-nitrophenyl)pivalamide, 6i**, 27%, M.P. = 125-128°C, yellow solid, CAS: 404352-86-9.

<sup>1</sup>H NMR (400 MHz, Chloroform-*d*) δ 10.97 (s, 1H), 8.88 (s, 1H), 8.53 (s, 1H), 6.31 (t,  $J$  = 1.4 Hz, 1H), 2.48 (d,  $J$  = 1.3 Hz, 3H), 1.38 (s, 9H). <sup>13</sup>C NMR (100 MHz, CDCl<sub>3</sub>) δ 177.93, 159.04, 158.05,

150.80, 138.12, 123.37, 115.45, 109.14, 40.84, 27.35, 18.36. IR( $\text{cm}^{-1}$ ): 3302, 2964, 2927, 2870, 1662, 1586, 1529, 1501, 1400, 1346, 1274, 1161, 1093, 808, 744, 734.

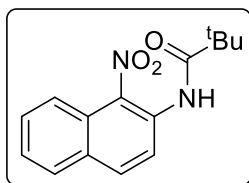

**N-(1-nitronaphthalen-2-yl)pivalamide, 6j**, 45%, oil

$^1\text{H}$  NMR (400 MHz,  $\text{CDCl}_3$ )  $\delta$  9.44 (s, 1H), 8.47 (d,  $J = 9.1$  Hz, 1H), 8.06 (d,  $J = 8.7$  Hz, 1H), 7.97 (d,  $J = 9.1$  Hz, 1H), 7.83 (d,  $J = 8.1$  Hz, 1H), 7.62 (t,  $J = 7.1$  Hz, 1H), 7.50 (t,  $J = 7.5$  Hz, 1H), 1.36 (s, 9H).  $^{13}\text{C}$  NMR (100 MHz,  $\text{CDCl}_3$ )  $\delta$  177.59, 135.95, 133.74, 131.86, 130.31, 129.36, 128.24, 126.33, 125.67, 122.30, 120.82, 40.31, 27.44. IR( $\text{cm}^{-1}$ ): 3290, 2969, 2900, 1662, 1623, 1595, 1532, 1495, 1495, 1428, 1401, 1349, 1264, 1218, 1611, 1074, 1065, 1056, 826, 799, 756. HRMS (ESI)  $m/z$  calcd for  $\text{C}_{15}\text{H}_{17}\text{N}_2\text{O}_3^+$  ( $\text{M}+\text{H}$ ) $^+$  273.1234, found 273.1231.

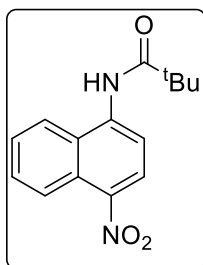

**N-(4-nitronaphthalen-1-yl)pivalamide, 6k**, 60%, M.P. = 136-139°C, yellow solid.

$^1\text{H}$  NMR (400 MHz,  $\text{CDCl}_3$ )  $\delta$  9.14 (s, 1H), 8.02 (d,  $J = 9.0$  Hz, 1H), 7.90 – 7.86 (m, 2H), 7.79 (d,  $J = 9.1$  Hz, 1H), 7.66 – 7.60 (m, 2H), 1.44 (s, 9H).  $^{13}\text{C}$  NMR (100 MHz,  $\text{CDCl}_3$ )  $\delta$  140.87, 135.87, 131.00, 129.62, 129.15, 128.20, 127.58, 127.29, 126.91, 126.64, 120.21, 39.88, 27.51. IR( $\text{cm}^{-1}$ ): 3409, 2966, 1694, 1628, 1601, 1574, 1530, 1491, 1443, 1428, 1330, 1276, 1216, 1172, 1155, 1065, 865, 814, 794, 779, 745. HRMS (ESI)  $m/z$  calcd for  $\text{C}_{15}\text{H}_{17}\text{N}_2\text{O}_3^+$  ( $\text{M}+\text{H}$ ) $^+$  273.1234, found 273.1231.

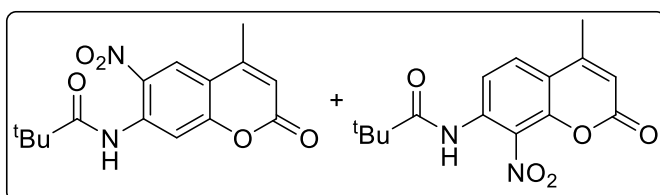

**N-(4-methyl-6-nitro-2-oxo-2H-chromen-7-yl)pivalamide, 6l**, 38%, M.P.=122-126°C, yellow solid, r.r = 1:1.

$^1\text{H}$  NMR (400 MHz,  $\text{CDCl}_3$ )  $\delta$  8.60 (s, 1H), 8.33 (d,  $J = 8.8$  Hz, 1H), 8.07 (d,  $J = 9.9$  Hz, 3H), 7.84 (d,  $J = 8.3$  Hz, 1H), 7.53 (s, 1H), 7.49 (d,  $J = 7.7$  Hz, 1H), 7.26 (d,  $J = 7.2$  Hz, 1H), 2.35 (s, 3H), 2.28 (s, 3H), 1.36 (s, 9H), 1.34 (s, 9H).  $^{13}\text{C}$  NMR (100 MHz,  $\text{CDCl}_3$ )  $\delta$  176.72, 176.69, 144.78, 143.35, 142.11, 138.26, 136.09, 130.35, 127.50, 127.45, 126.03, 125.51, 122.86, 122.82, 120.82, 120.79, 40.25, 39.56, 27.56, 27.42, 18.84, 17.54. IR( $\text{cm}^{-1}$ ): 3357, 2968, 2899, 1755, 1662, 1626, 1568, 1532, 1506, 1481, 1449, 1384, 1298, 1361, 1298, 1275, 1255, 1190, 1160, 1065, 1055, 903, 878, 745. HRMS (ESI)  $m/z$  calcd for  $\text{C}_{15}\text{H}_{17}\text{N}_2\text{O}_5^+$  ( $\text{M}+\text{H}$ ) $^+$  305.1132, found 305.1135.



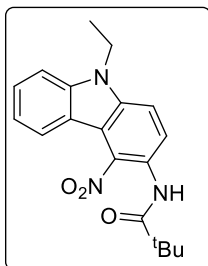

**N-(9-ethyl-2-nitro-9H-carbazol-3-yl)pivalamide, 6m**, 32%, M.P.=164-167°C, brown solid.

$^1\text{H}$  NMR (400 MHz,  $\text{CDCl}_3$ )  $\delta$  8.60 (d,  $J = 2.1$  Hz, 1H), 8.01 – 7.97 (m, 2H), 7.68 (s, 1H), 7.52 (t,  $J = 7.8$  Hz, 1H), 7.42 (d,  $J = 8.3$  Hz, 1H), 7.26 (d,  $J = 7.5$  Hz, 1H), 4.28 (q,  $J = 7.1$  Hz, 2H), 1.39 (s, 9H), 1.33 (s, 3H).  $^{13}\text{C}$  NMR (100 MHz,  $\text{CDCl}_3$ )  $\delta$  177.14, 142.45, 135.02, 129.25, 128.42, 128.36, 127.64, 122.16, 120.70, 120.50, 117.98, 115.75, 109.93, 40.72, 39.64, 27.64, 14.15. IR( $\text{cm}^{-1}$ ): 3320, 2965, 2924, 1656, 1605, 1576, 1522, 1479, 1449, 1400, 1381, 1331, 1296, 1260, 1210, 1163, 1124, 1078, 966, 936, 869, 766, 744. HRMS (ESI)  $m/z$  calcd for  $\text{C}_{19}\text{H}_{22}\text{N}_3\text{O}_3^+$  ( $\text{M}+\text{H}$ ) $^+$  340.1656, found 340.1651.

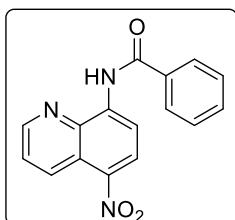

**N-(5-nitroquinolin-8-yl)benzamide, 6n**, 52%, M.P.=76-79°C, yellow solid, CAS: 62802-76-0.

$^1\text{H}$  NMR (400 MHz,  $\text{CDCl}_3$ )  $\delta$  10.97 (s, 1H), 9.20 (d,  $J = 8.9$  Hz, 1H), 8.93 – 8.85 (m, 2H), 8.51 (d,  $J = 8.8$  Hz, 1H), 8.00 (d,  $J = 7.0$  Hz, 2H), 7.66 (dd,  $J = 8.9, 4.2$  Hz, 1H), 7.55 – 7.48 (m, 3H).  $^{13}\text{C}$  NMR (100 MHz,  $\text{CDCl}_3$ )  $\delta$  165.66, 149.08, 140.85, 138.70, 137.77, 134.15, 133.41, 132.63, 129.03, 127.86, 127.46, 124.71, 121.82, 113.72. IR( $\text{cm}^{-1}$ ): 3353, 2986, 2899, 1570, 1534, 1505, 1483, 1450, 1381, 1322, 1257, 1229, 1197, 1165, 1065, 1056, 891, 854, 839, 812, 791, 739, 691, 683, 642.

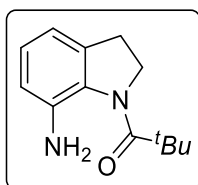

**1-(7-aminoindolin-1-yl)-2,2-dimethylpropan-1-one, 10**, 71%, oil.

$^1\text{H}$  NMR (400 MHz,  $\text{CDCl}_3$ ): 8.04 (d,  $J = 8.5$  Hz, 1H), 6.55 (s, 1H), 6.51 (d,  $J = 8.4$  Hz, 1H), 4.17 (t,  $J = 8.0$  Hz, 2H), 3.55 (s, 2H), 3.04 (t,  $J = 8.0$  Hz, 2H), 1.35 (s, 9H).  $^{13}\text{C}$  NMR (100MHz,  $\text{CDCl}_3$ ): 175.48, 142.72, 136.96, 132.12, 119.12, 113.63, 111.31, 49.33, 39.85, 29.42, 27.74. IR( $\text{cm}^{-1}$ ): 3433, 3348, 2962, 1618, 1590, 1487, 1440, 1404, 1378, 1363, 1331, 1192, 1092, 903, 818, 746. HRMS (ESI)  $m/z$  calcd for  $\text{C}_{13}\text{H}_{19}\text{N}_2\text{O}^+$  ( $\text{M}+\text{H}$ ) $^+$  219.1492, found 219.1494.

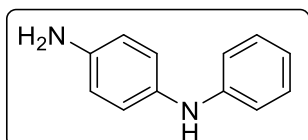

**N<sup>1</sup>-phenylbenzene-1,4-diamine, 11**, 80%, M.P. = 69-73°C, gray solid CAS:101-54-2<sup>[4]</sup>

$^1\text{H}$  NMR (400 MHz,  $\text{CDCl}_3$ )  $\delta$  7.19 – 7.15 (m, 2H), 6.95 (d,  $J$  = 8.6 Hz, 2H), 6.83 (d,  $J$  = 7.5 Hz, 2H), 6.78 (t,  $J$  = 7.3 Hz, 1H), 6.64 (d,  $J$  = 8.5 Hz, 2H), 5.38 (s, 1H), 3.44 (s, 2H).  $^{13}\text{C}$  NMR (100 MHz,  $\text{CDCl}_3$ )  $\delta$  145.94, 142.15, 133.86, 129.32, 123.36, 119.03, 116.21, 115.12. IR ( $\text{cm}^{-1}$ ): 3458, 3370, 2361, 2343, 1594, 1507, 1281, 812, 744.

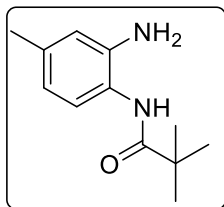

**N-(2-amino-4-methylphenyl)pivalamide, 12**, 70%, white solid, M.P. = 196-199 °C

$^1\text{H}$  NMR (400 MHz,  $\text{CDCl}_3$ )  $\delta$  7.31 (s, 1H), 6.99 (d,  $J$  = 8.4 Hz, 1H), 6.57 (d,  $J$  = 5.6 Hz, 2H), 3.71 (s, 2H), 2.23 (s, 3H), 1.31 (s, 9H).  $^{13}\text{C}$  NMR (100 MHz,  $\text{CDCl}_3$ )  $\delta$  177.32, 140.97, 137.03, 125.37, 121.84, 120.25, 118.67, 39.29, 27.78, 21.00. IR ( $\text{cm}^{-1}$ ): 3455, 3290, 2969, 2900, 1640, 1607, 1501, 1451, 1401, 1366, 1301, 1231, 1182, 1076, 1065, 1050, 789.

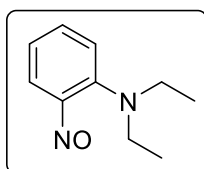

**N,N-diethyl-2-nitrosoaniline, 13**, 32%, oil

$^1\text{H}$  NMR (400 MHz,  $\text{CDCl}_3$ )  $\delta$  7.57 (d,  $J$  = 8.1 Hz, 1H), 7.33 (t,  $J$  = 7.0 Hz, 1H), 7.08 (d,  $J$  = 8.3 Hz, 1H), 6.87 (t,  $J$  = 7.7 Hz, 1H), 3.07 (t,  $J$  = 7.1 Hz, 4H), 1.01 (t,  $J$  = 7.1 Hz, 6H).  $^{13}\text{C}$  NMR (100 MHz,  $\text{CDCl}_3$ )  $\delta$  143.48, 143.24, 131.38, 124.43, 121.51, 119.49, 45.69, 11.55. IR ( $\text{cm}^{-1}$ ): 2971, 2937, 1602, 1564, 1520, 1484, 1443, 1379, 1347, 1297, 1258, 1187, 1141, 1079, 1046, 848, 798, 772, 746, 710.

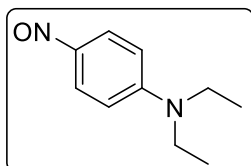

**N,N-diethyl-4-nitrosoaniline, 13'**, 47%, yellow solid, M.P. = 67-69°C

$^1\text{H}$  NMR (400 MHz,  $\text{CDCl}_3$ )  $\delta$  8.01 (d,  $J$  = 9.5 Hz, 2H), 6.49 (d,  $J$  = 9.5 Hz, 2H), 3.37 (q,  $J$  = 7.1 Hz, 4H), 1.15 (t,  $J$  = 7.2 Hz, 6H).  $^{13}\text{C}$  NMR (100 MHz,  $\text{CDCl}_3$ )  $\delta$  152.26, 136.27, 126.46, 109.85, 44.95, 12.38. IR ( $\text{cm}^{-1}$ ): 2980, 2936, 2906, 1598, 1574, 1522, 1481, 1437, 1412, 1380, 1302, 1273, 1192, 1163, 1110, 1074, 1008, 826, 793, 753, 728.

## IX. References

- [1] J. T. Hays, H. L. Young, and H. H. Espy. p-Nitrosophenol chemistry. II. Amination of p-nitrosophenol ethers with primary aromatic amines[J]. *The Journal of Organic Chemistry*, 1967, 32 (1): 158-162.
- [2] D. A. Fletcher, B. G. Gowenlock, K. G. Orrell, V. Šik. Dynamic NMR study of the factors governing nitroso group rotation in p-nitrosoanilines in the solution and solid states [J]. *Magnetic Resonance in Chemistry*, 1995, 33: 561-569.
- [3] E. Toja, D. Selva, and P. Schiatti. 3-Alkyl-2-aryl-3H-naphth[1,2-d] imidazoles, a novel class of nonacidic antiinflammatory agents.[J] *Journal of Medicinal Chemistry*, 1984, 27 (5): 610-616.
- [4] X. Liang, L. Xu, C. Li, X. Jia, Y. Wei. One-pot propagation of (Hetero)Arylamines: Modular synthesis of diverse Amino-di(hetero)arylamines. [J]. *Tetrahedron*, 2019, 75 (6):721-731.

**X.  $^1\text{H}$  NMR,  $^{13}\text{C}$  NMR and  $^{19}\text{F}$  NMR spectra of compound 2, 4, 6, 7a, 8a, 9a, 10, 11, 12, 13, 13'**

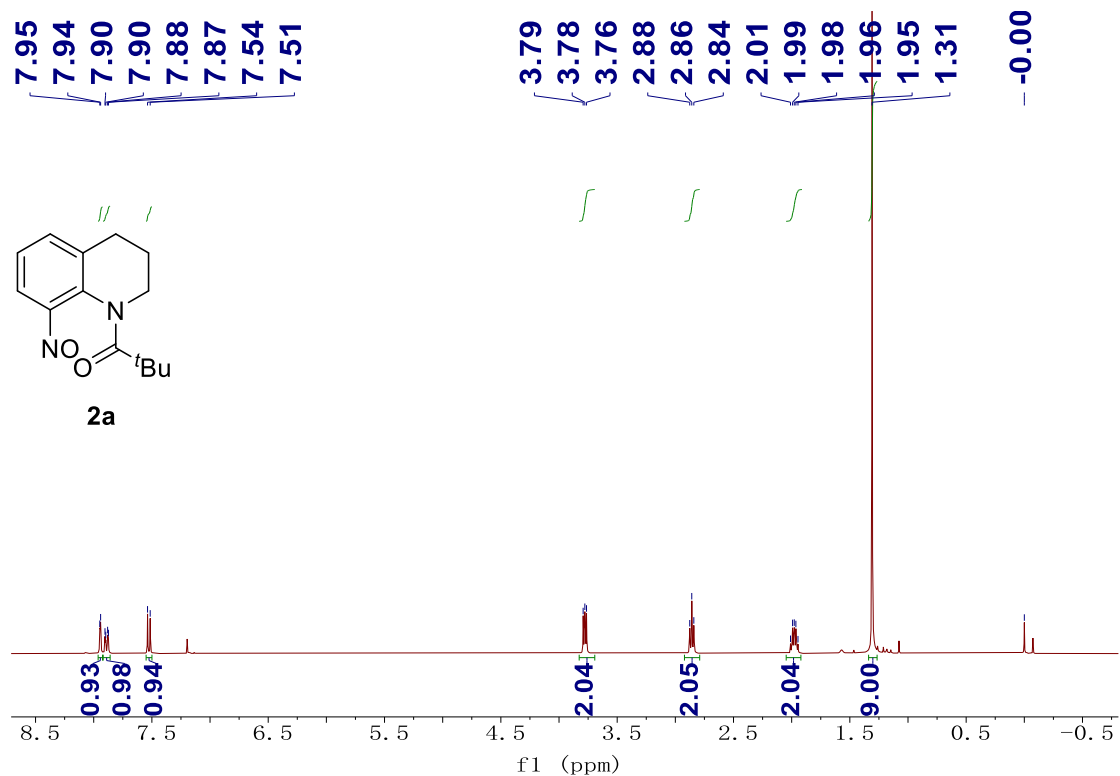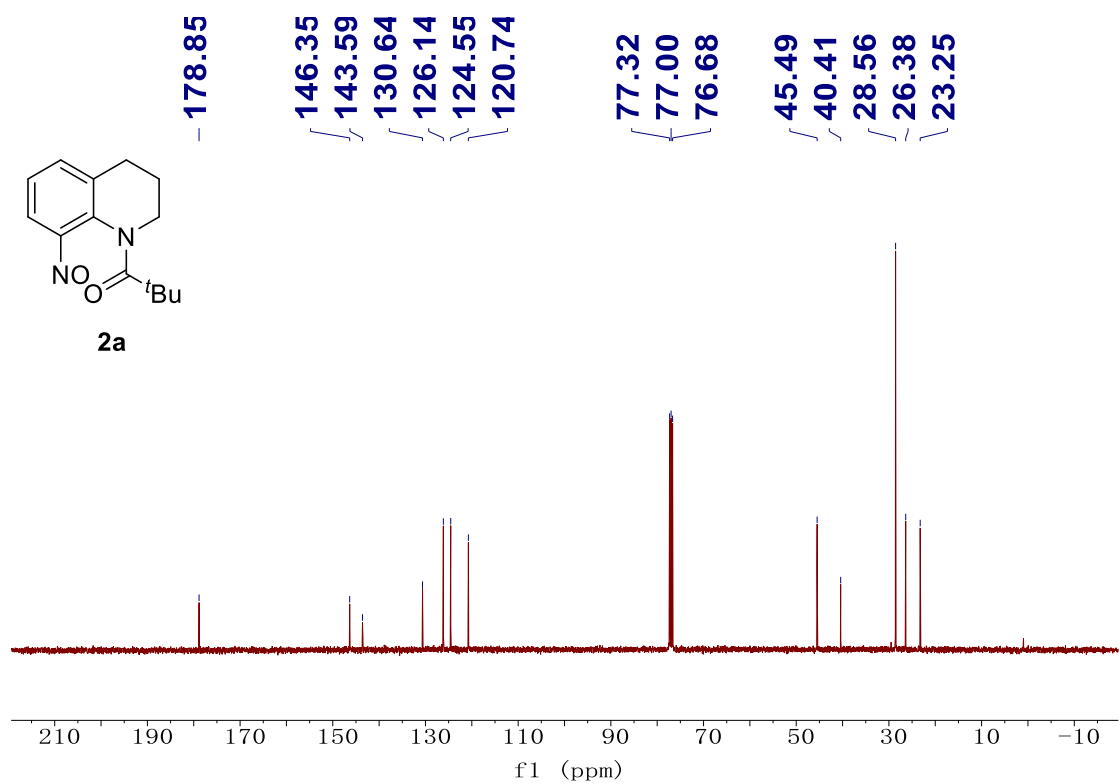

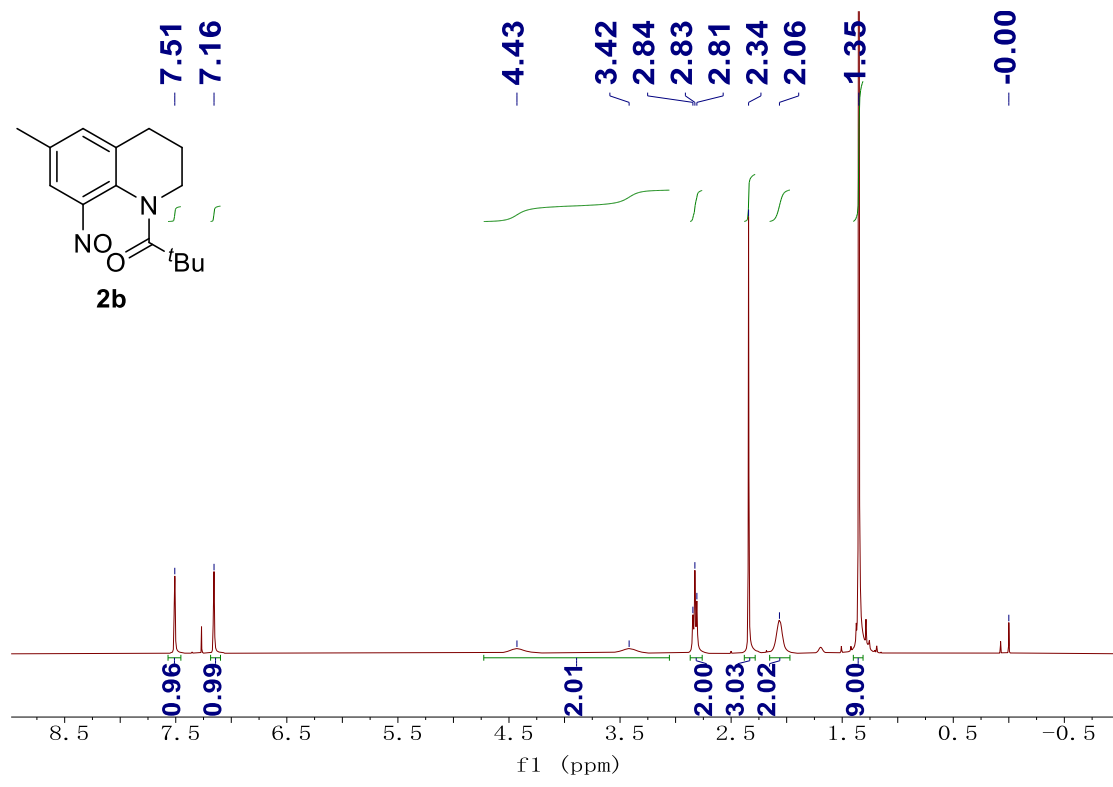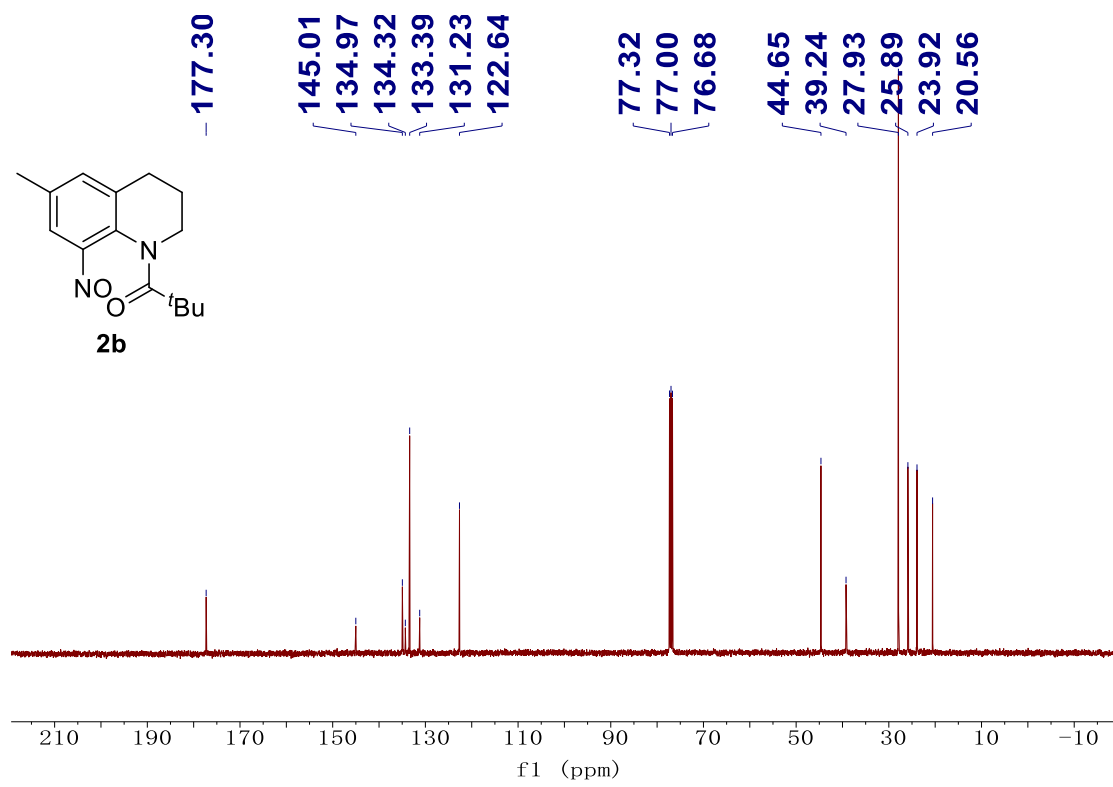

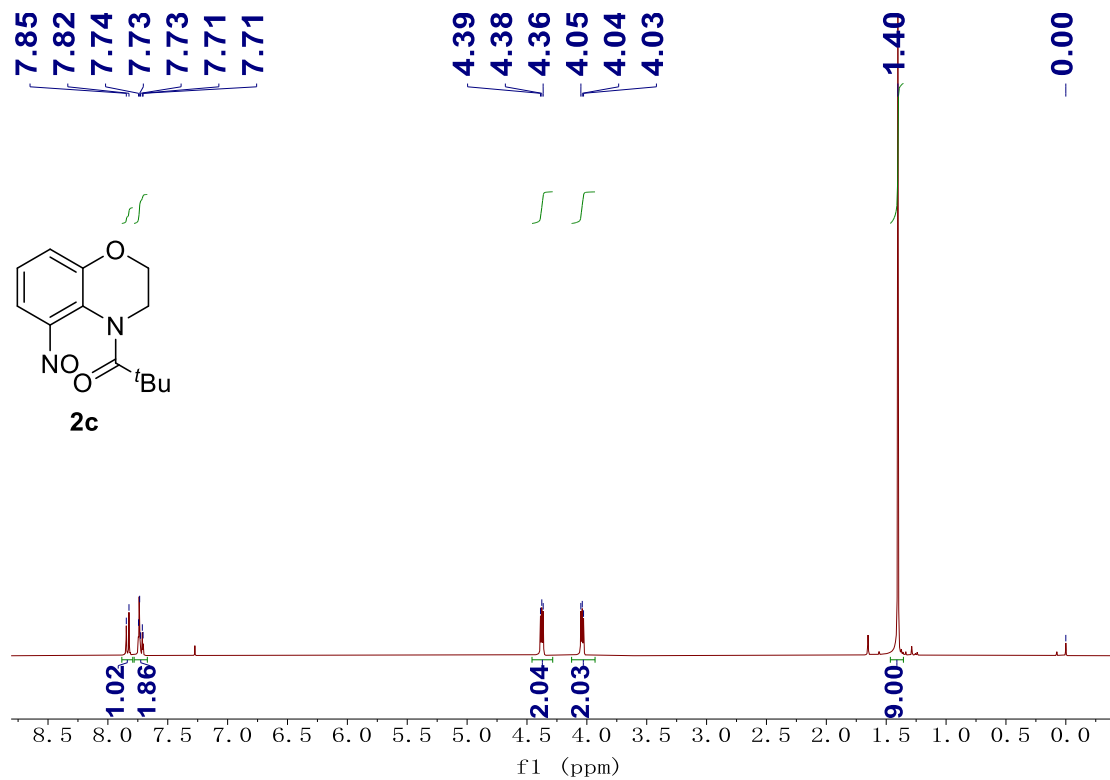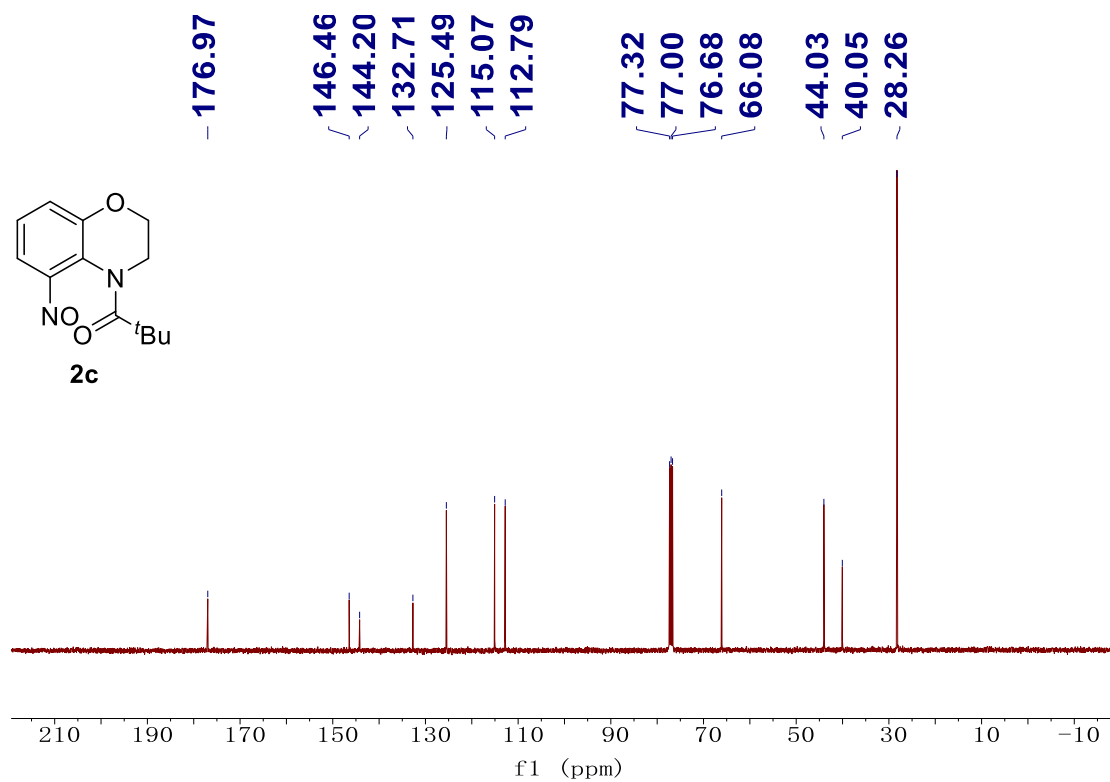

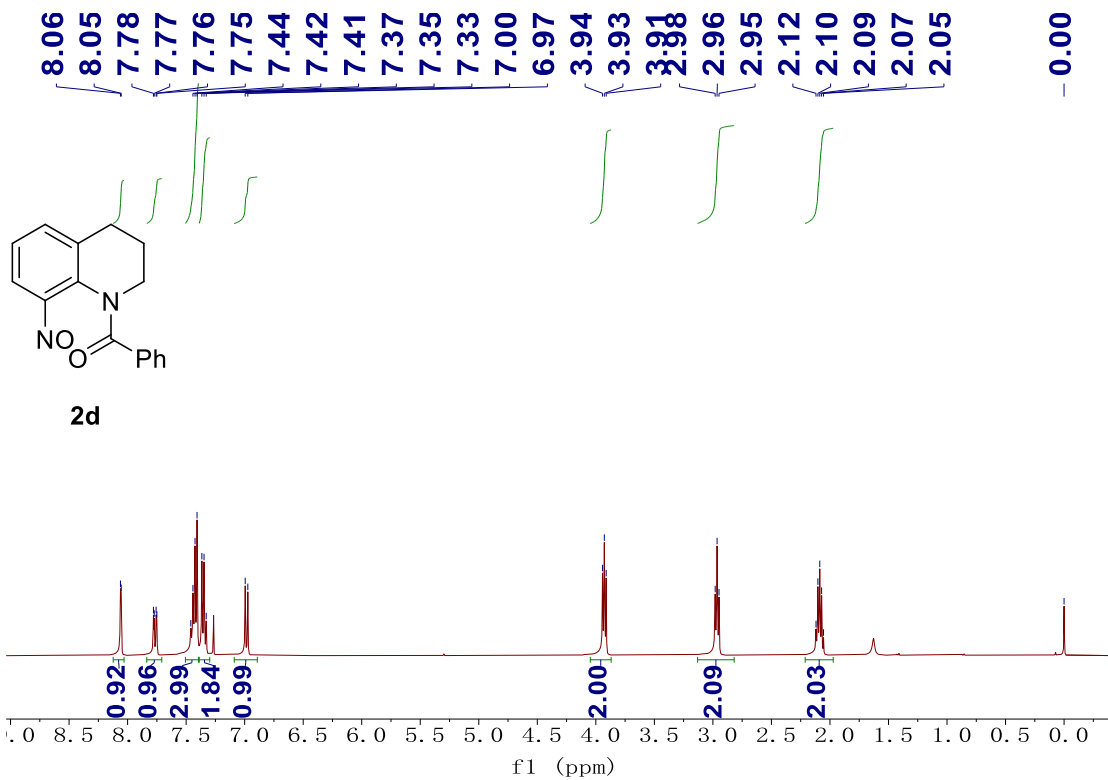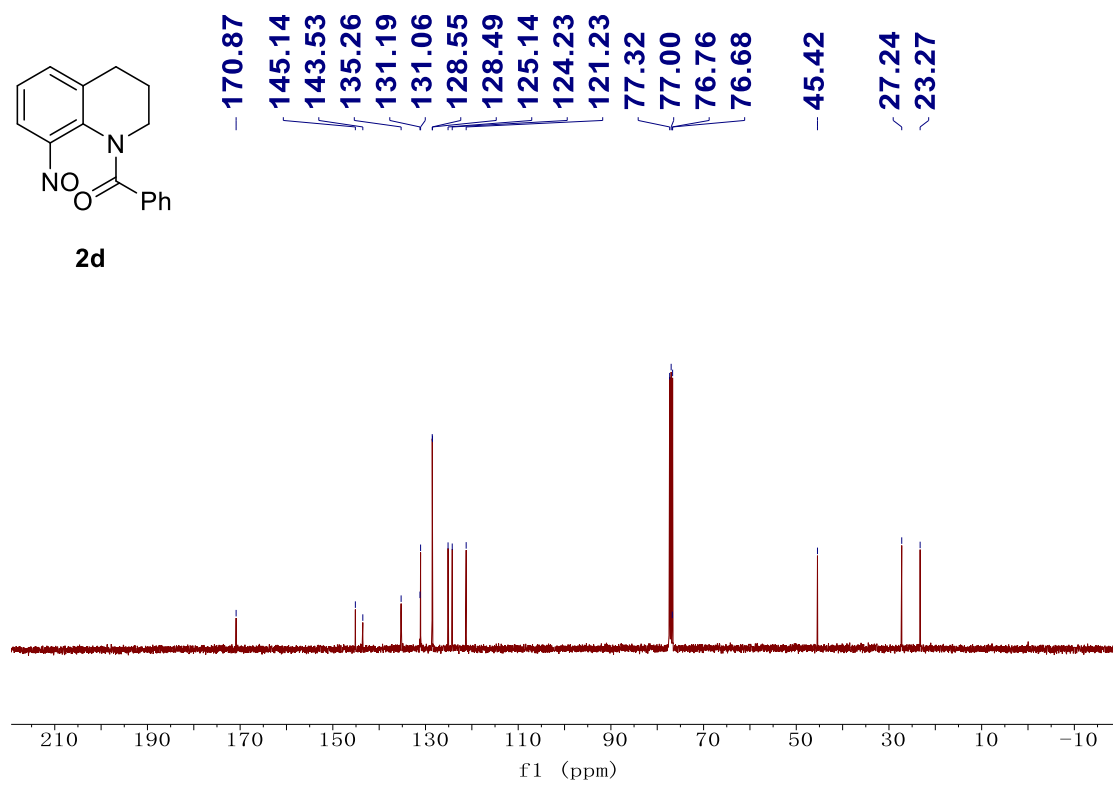

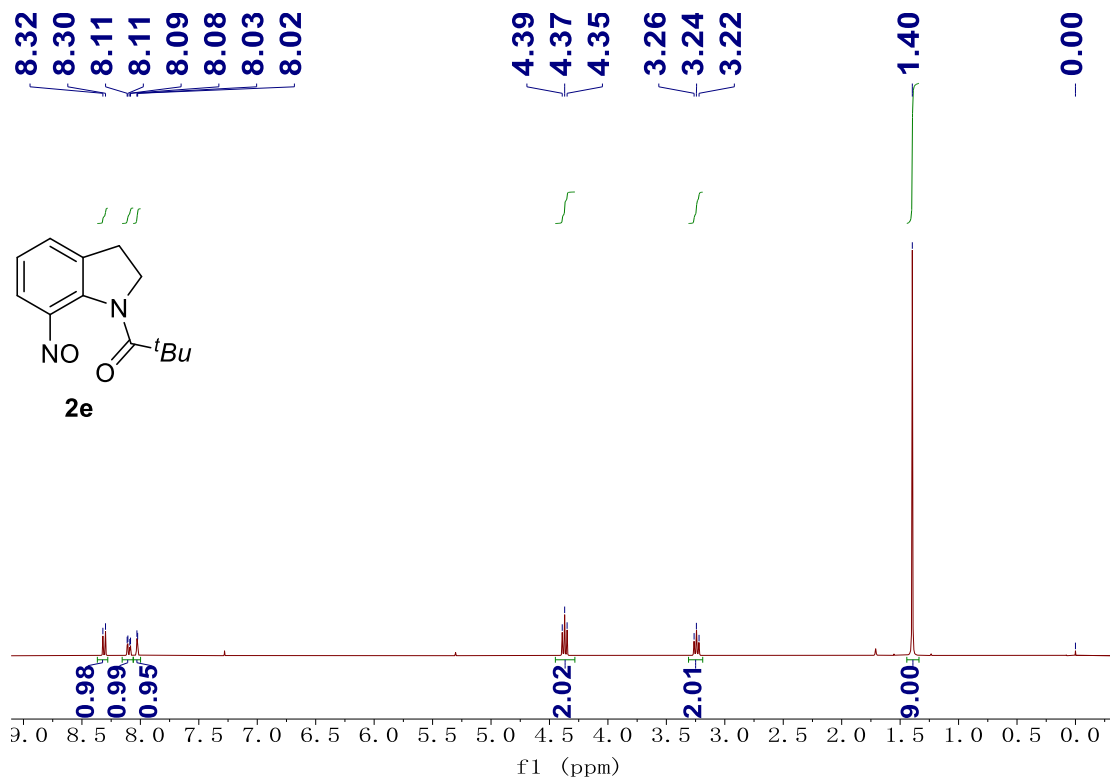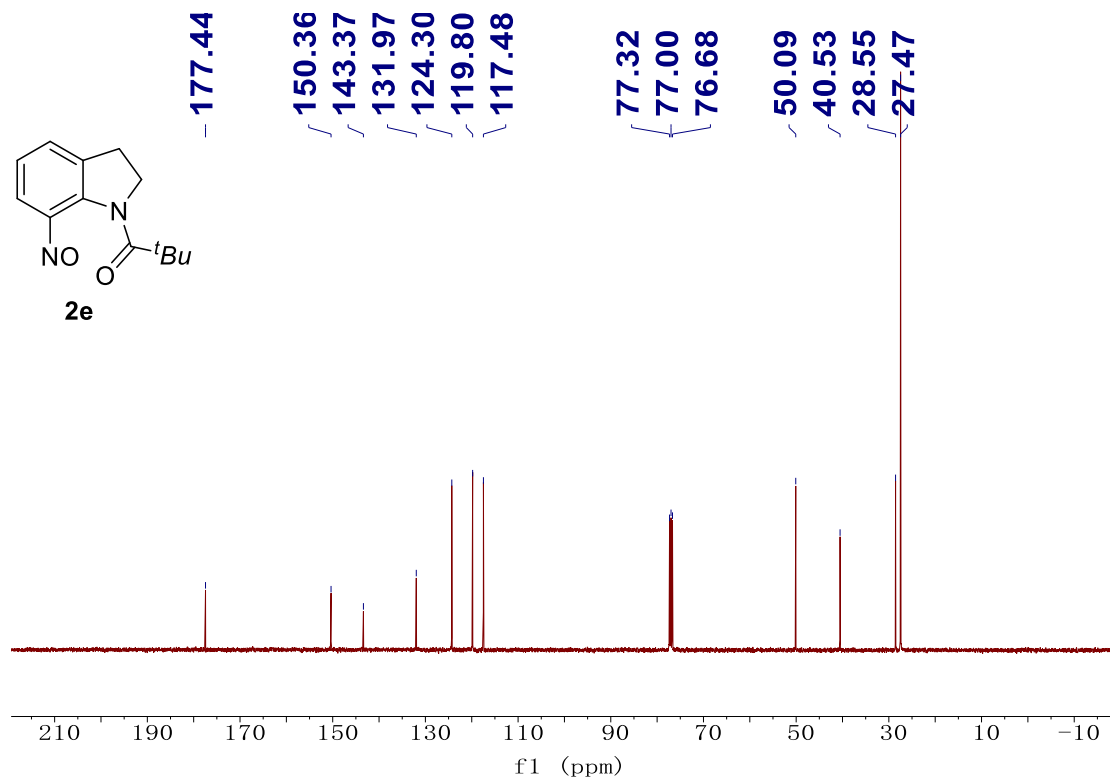

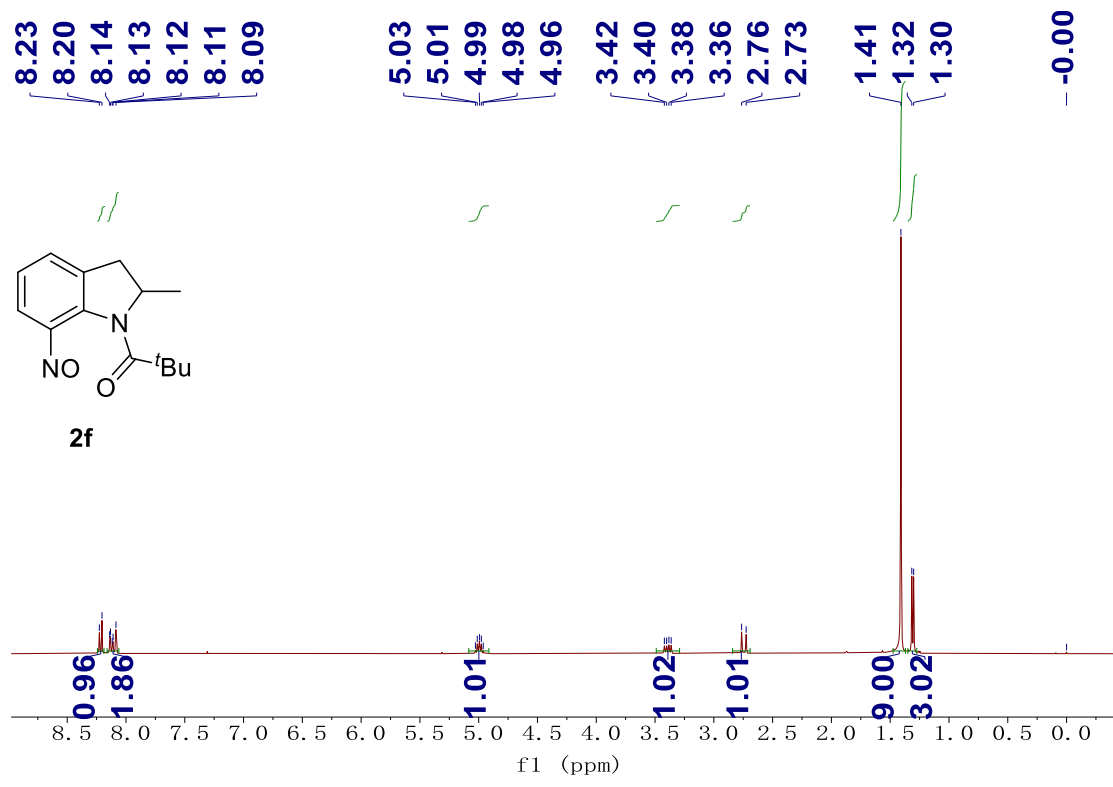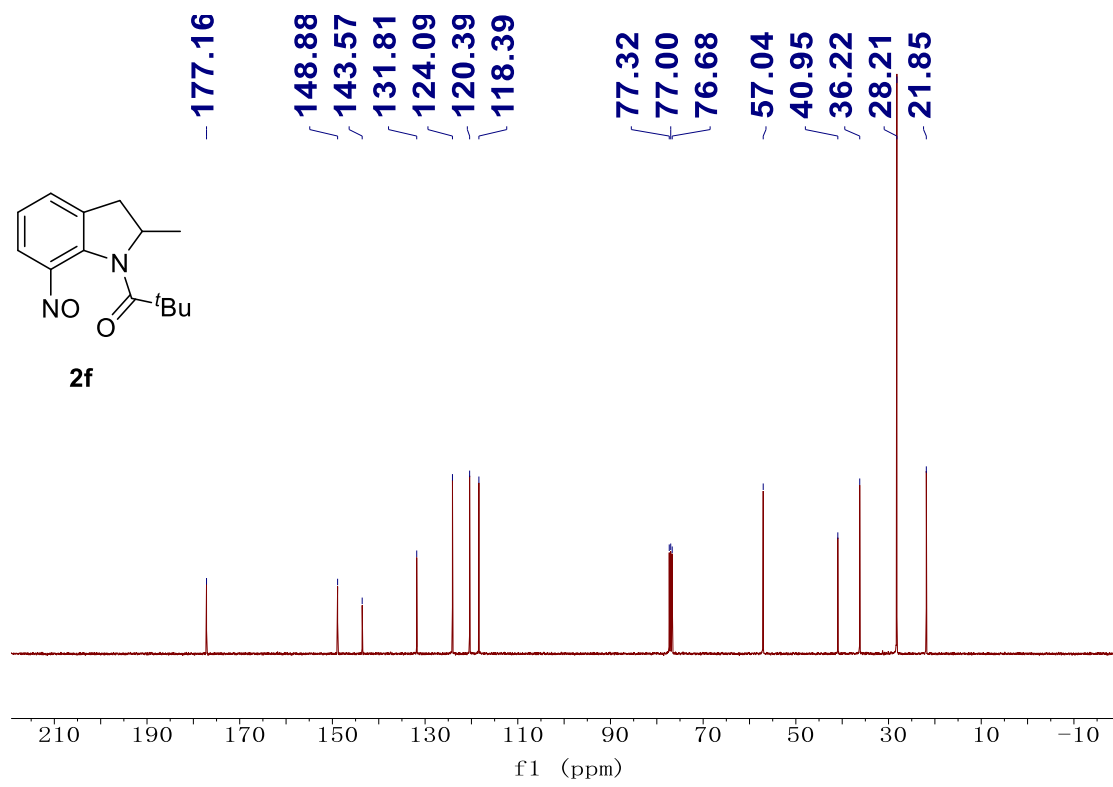



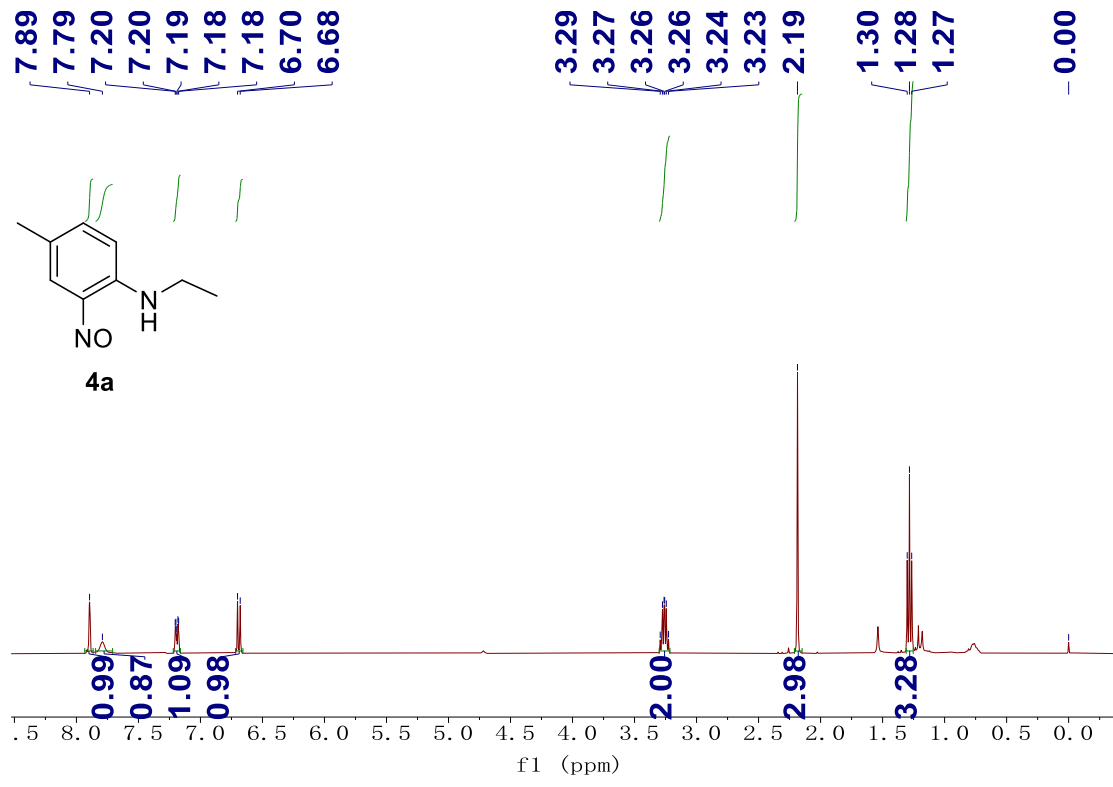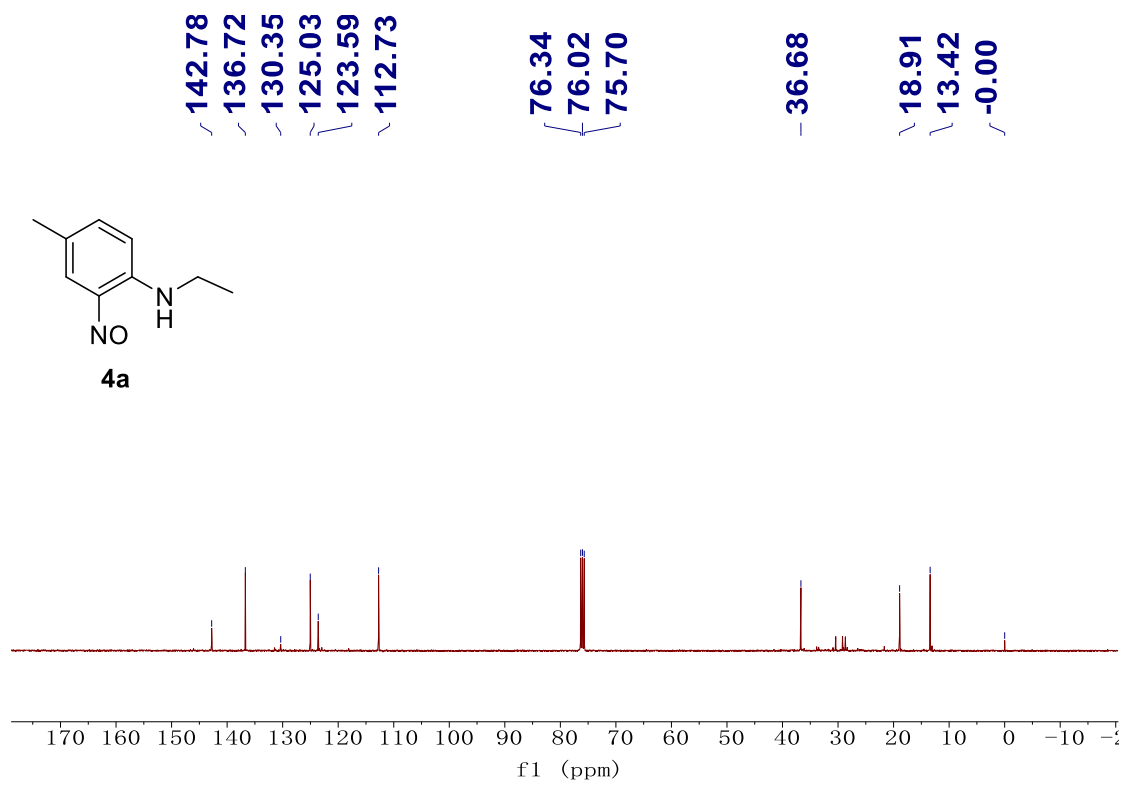

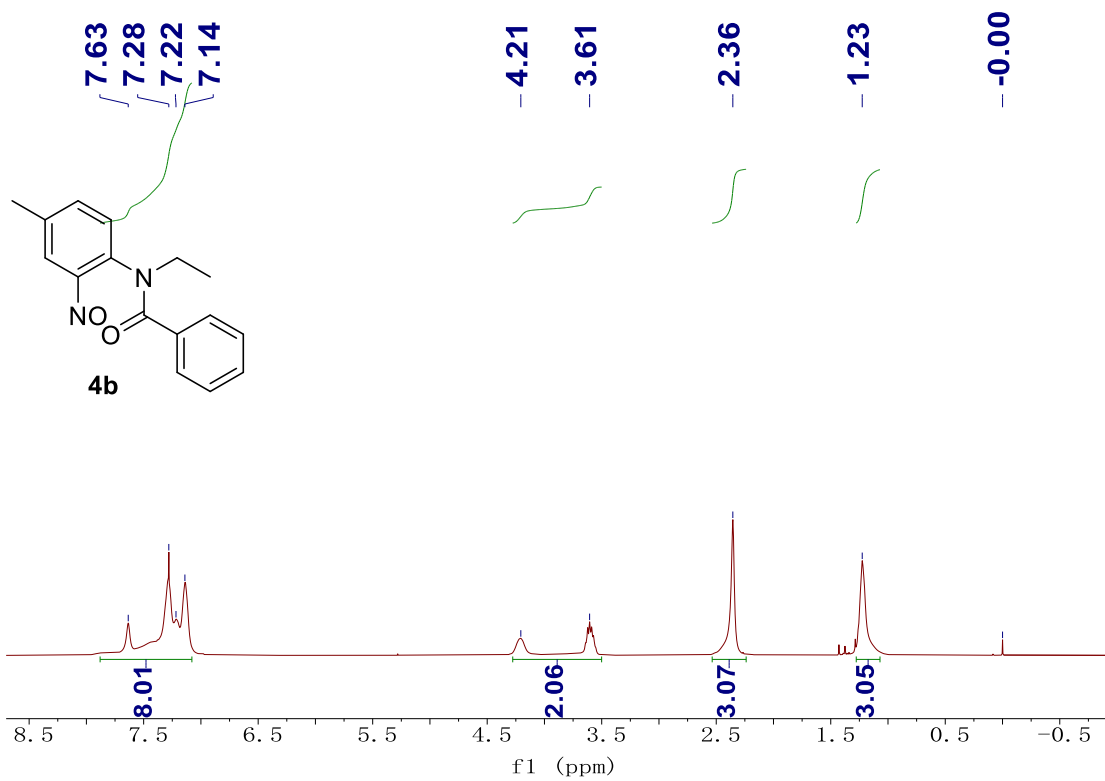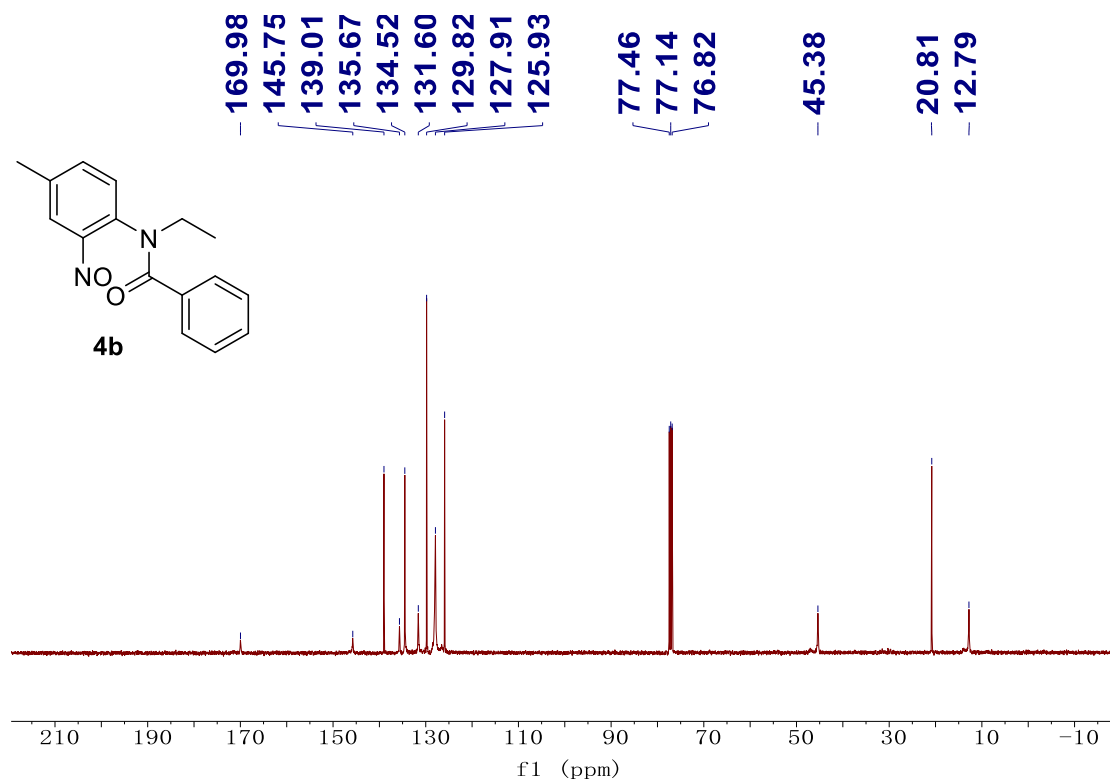

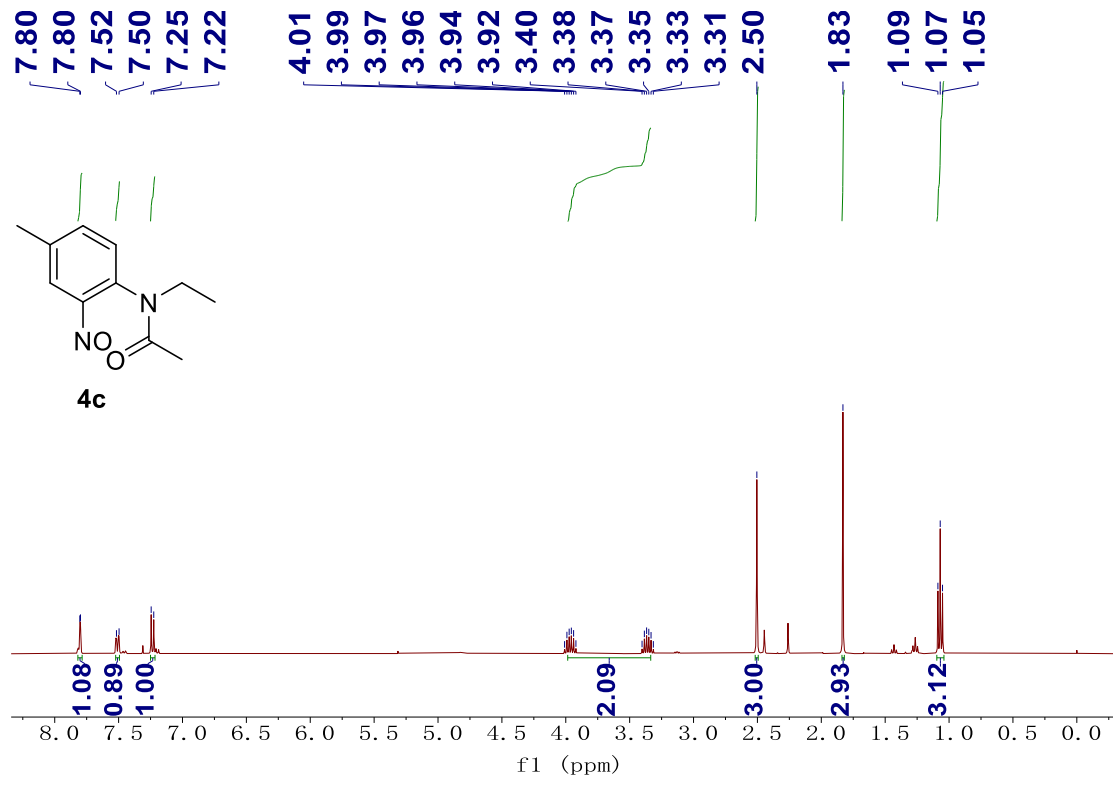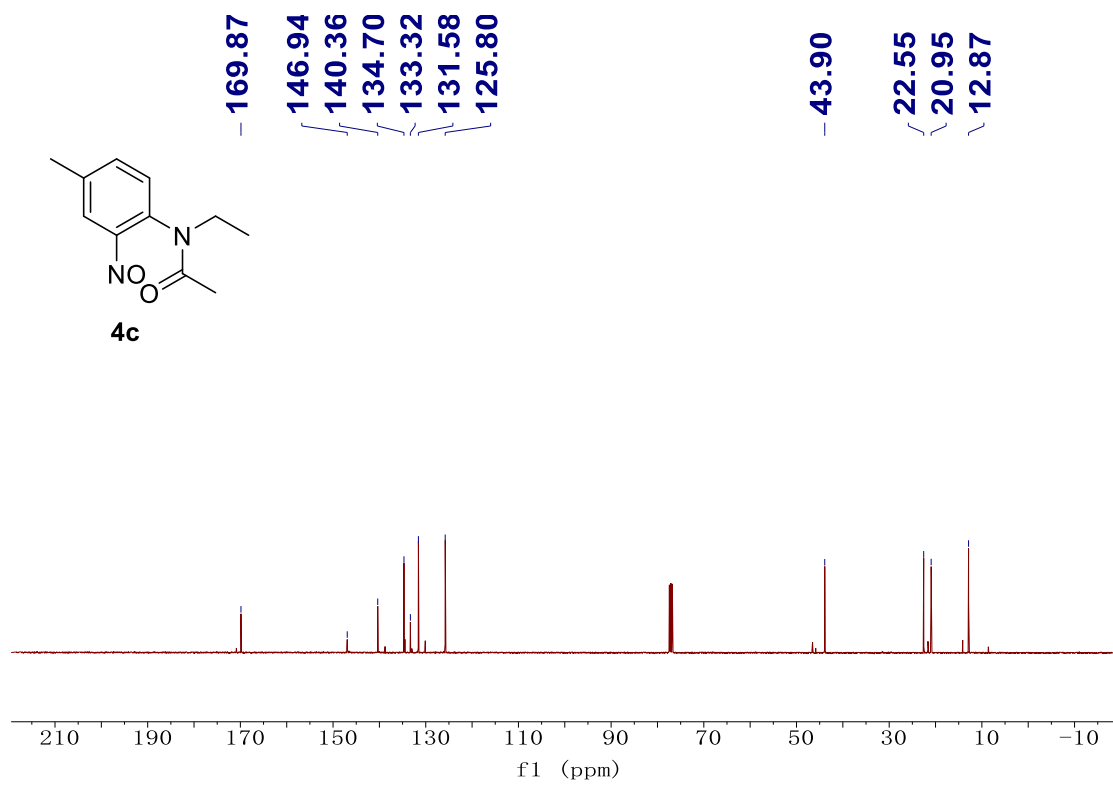

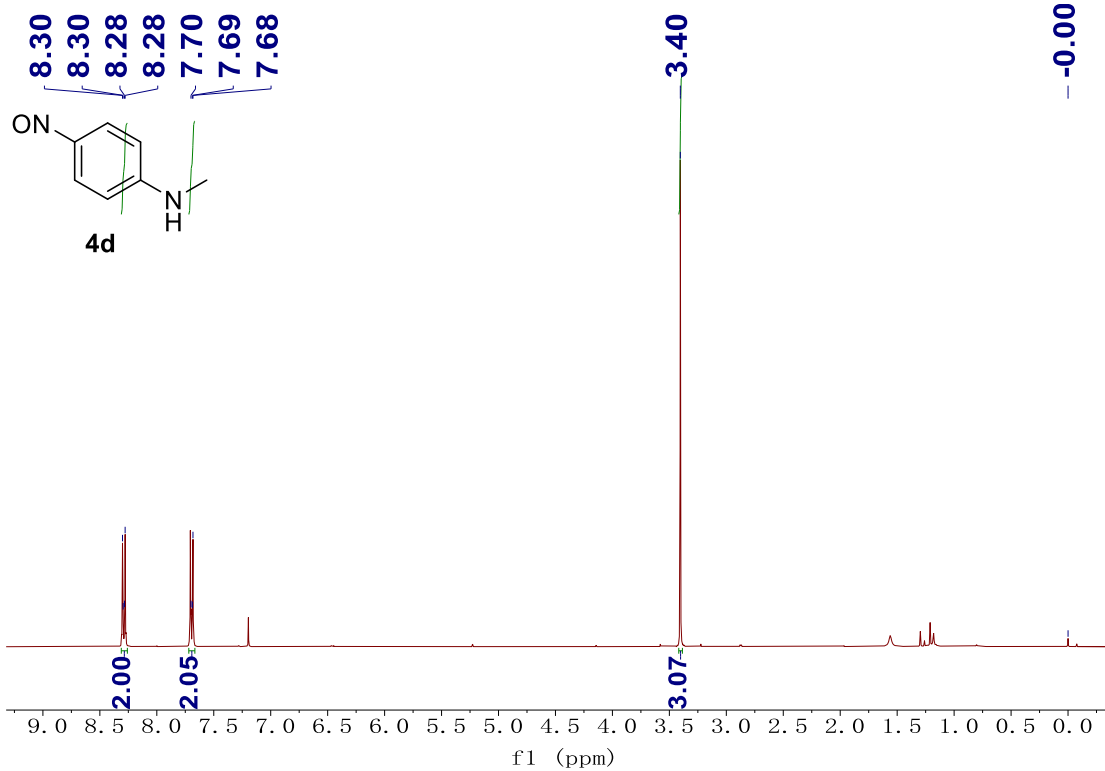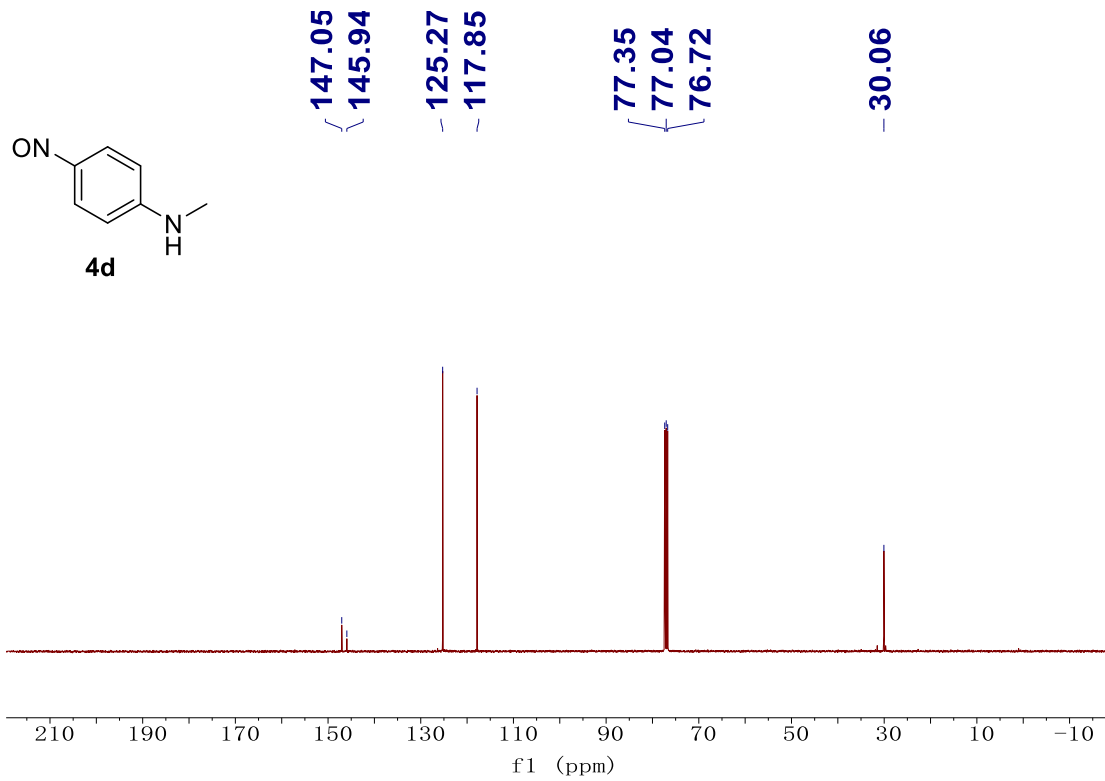

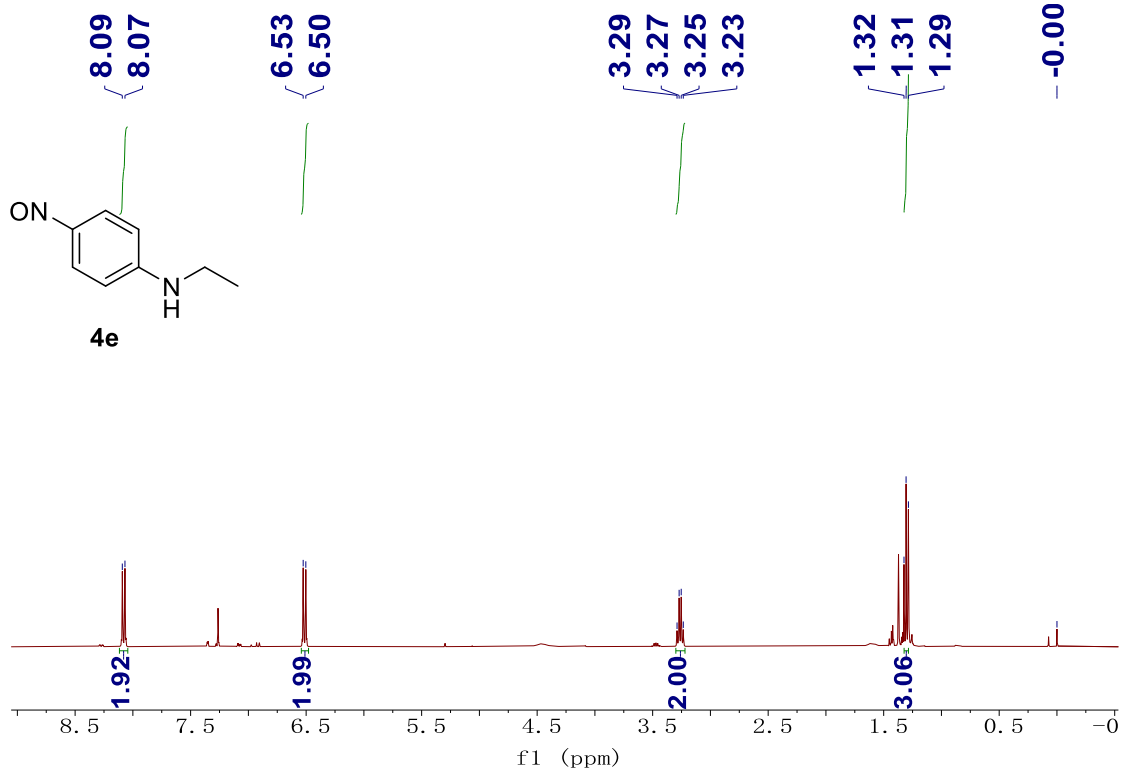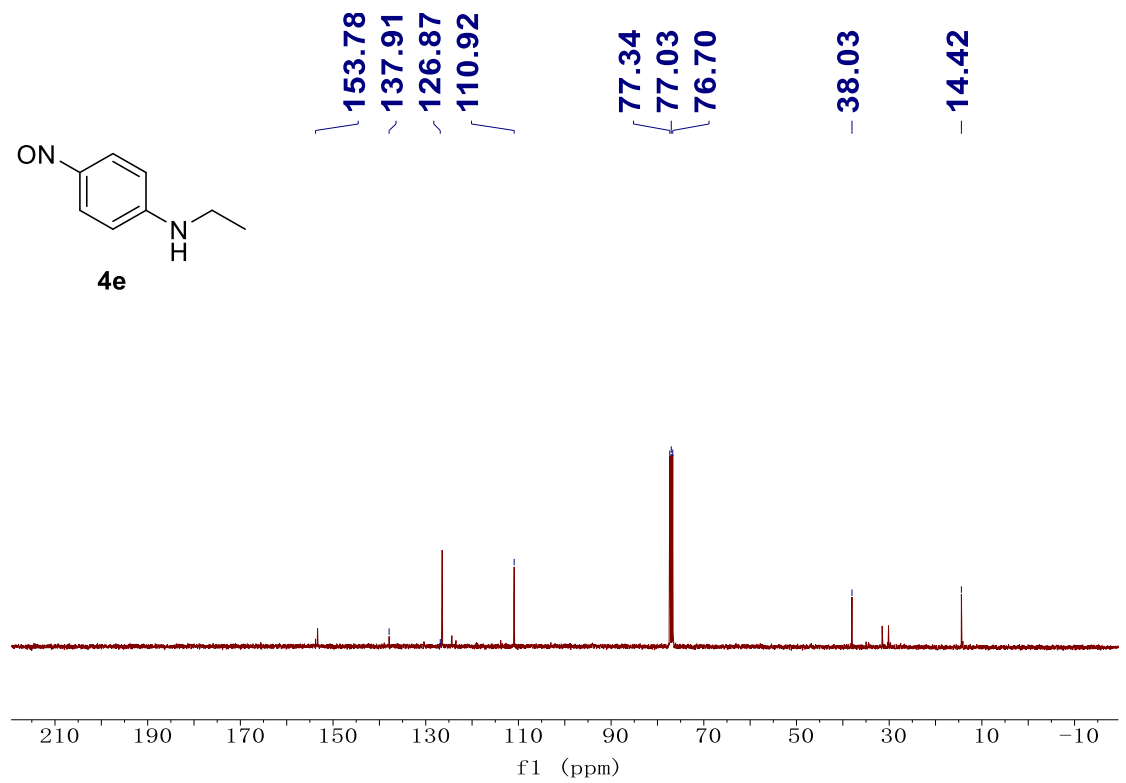

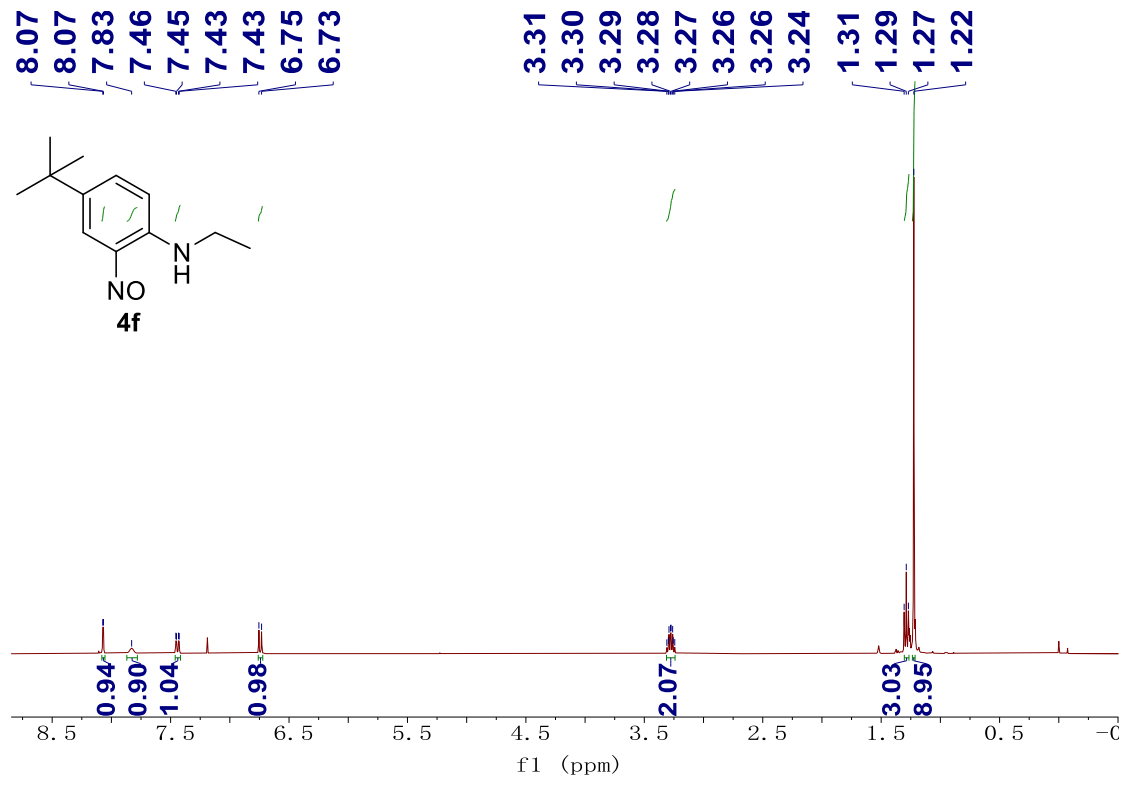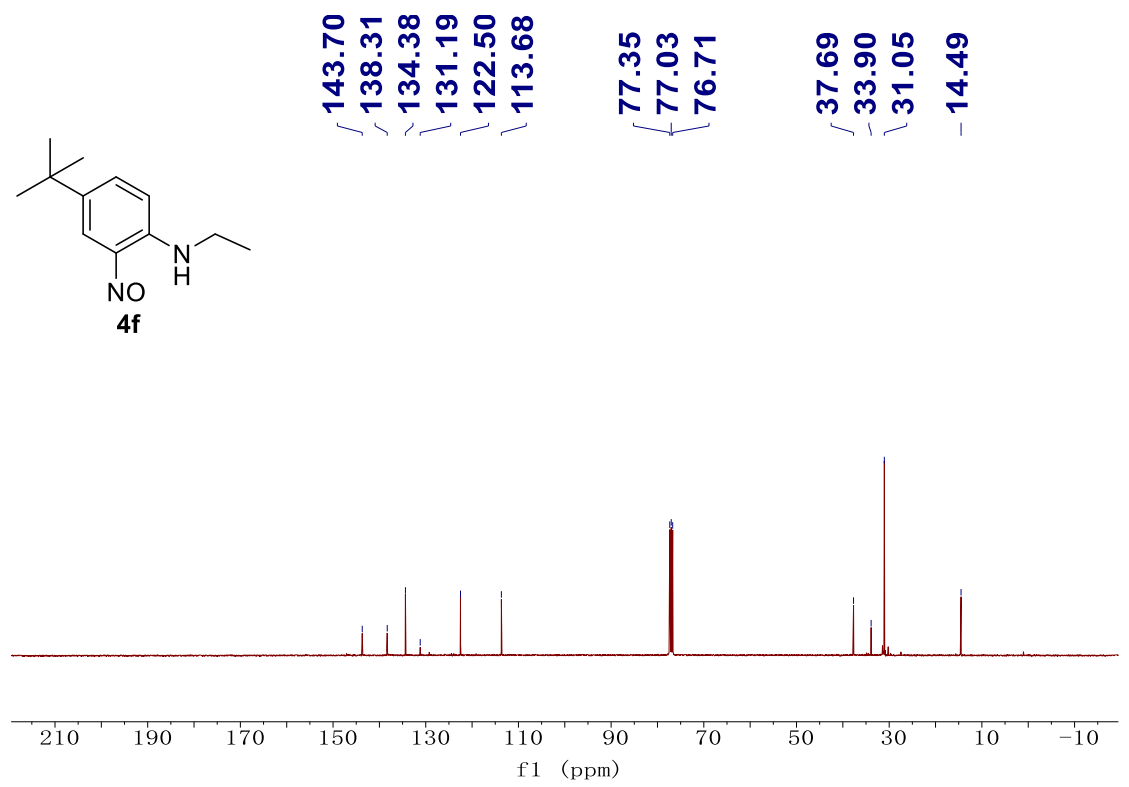

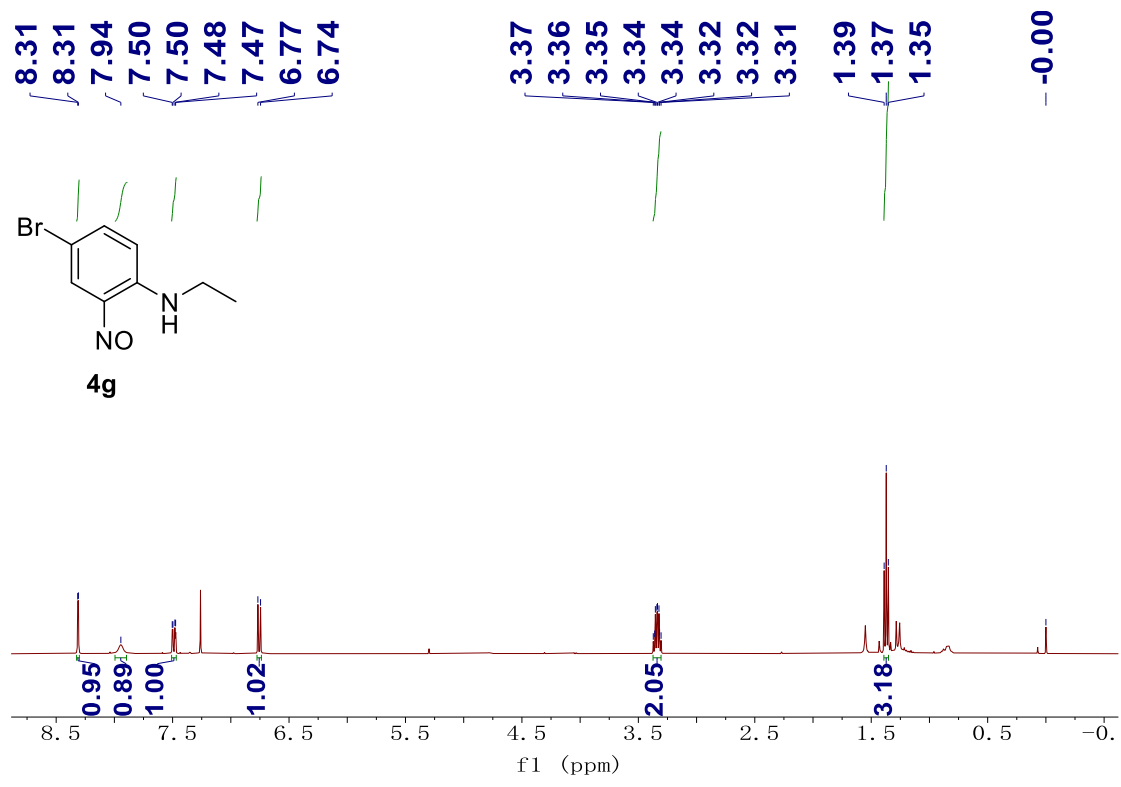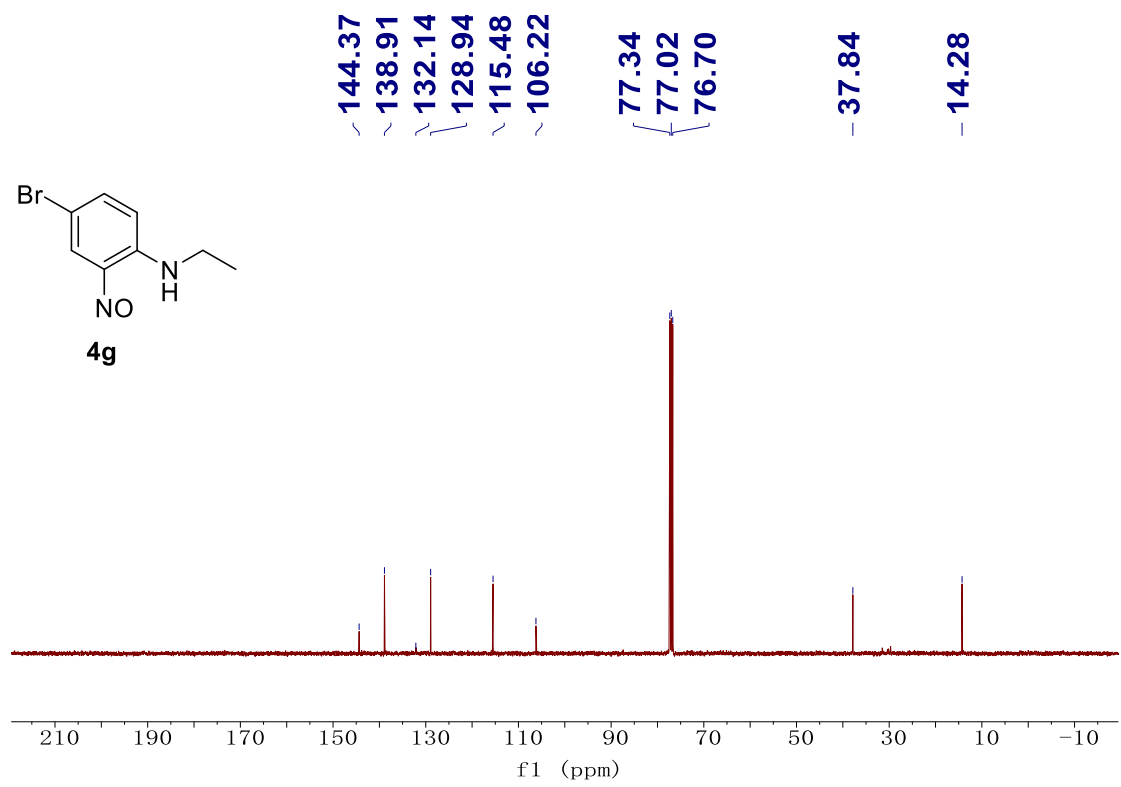

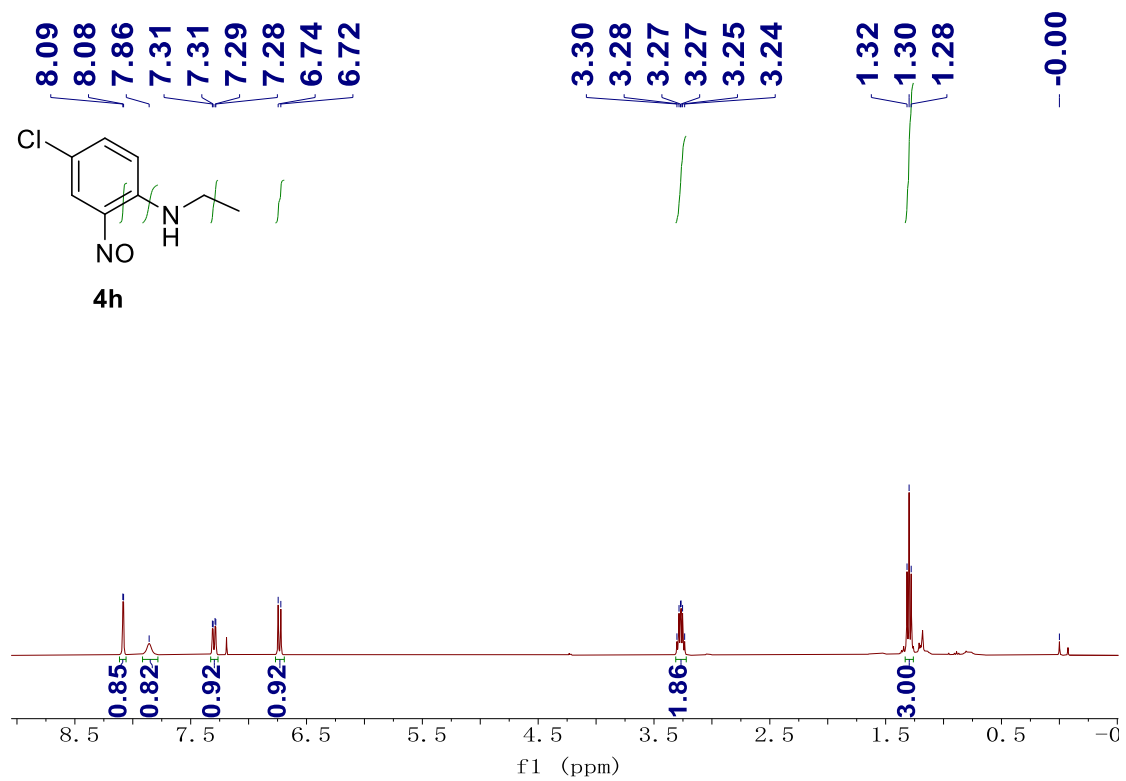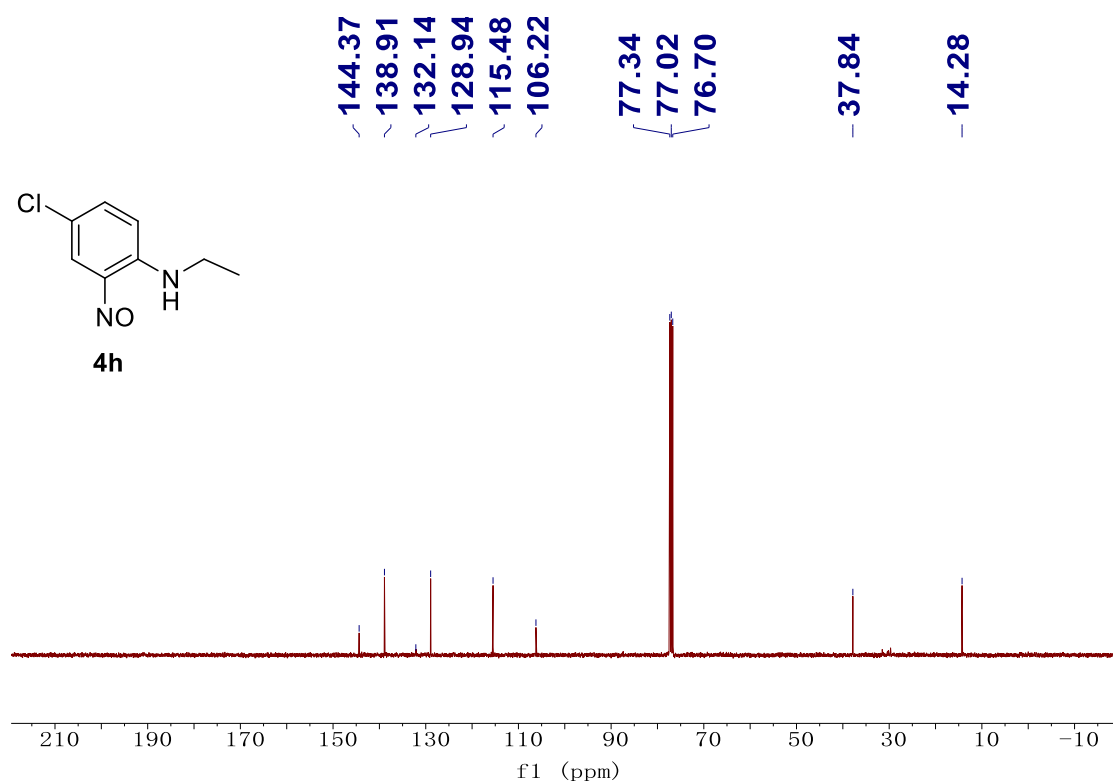



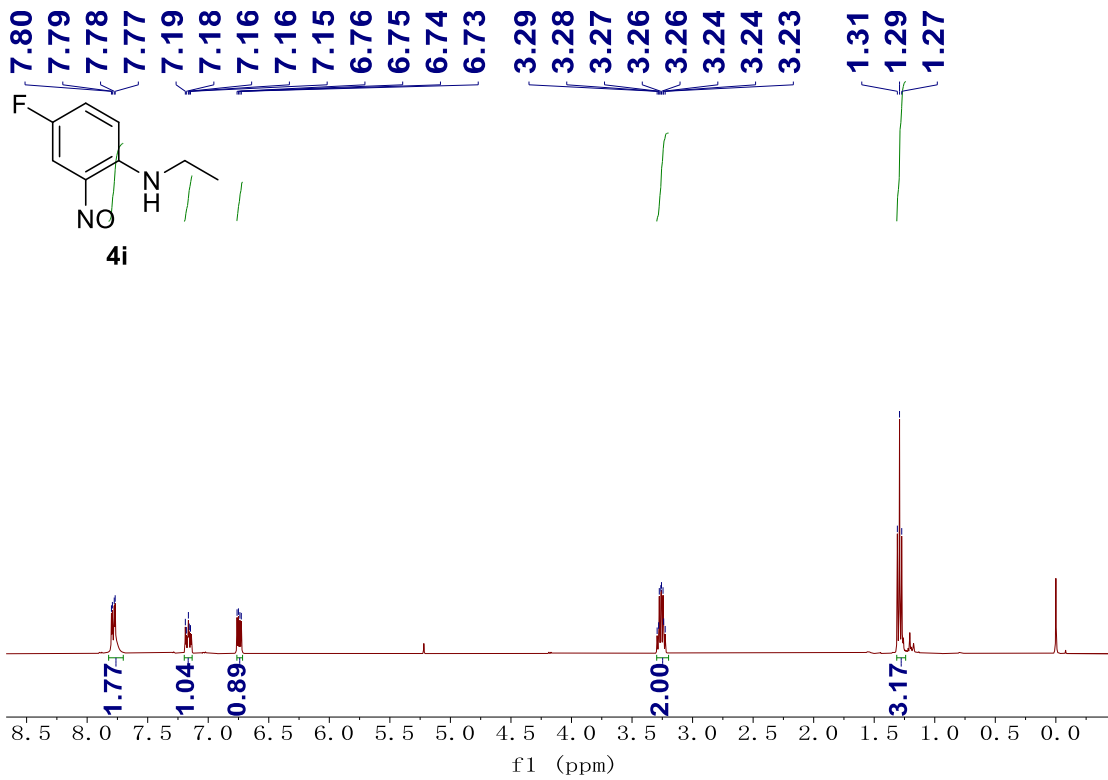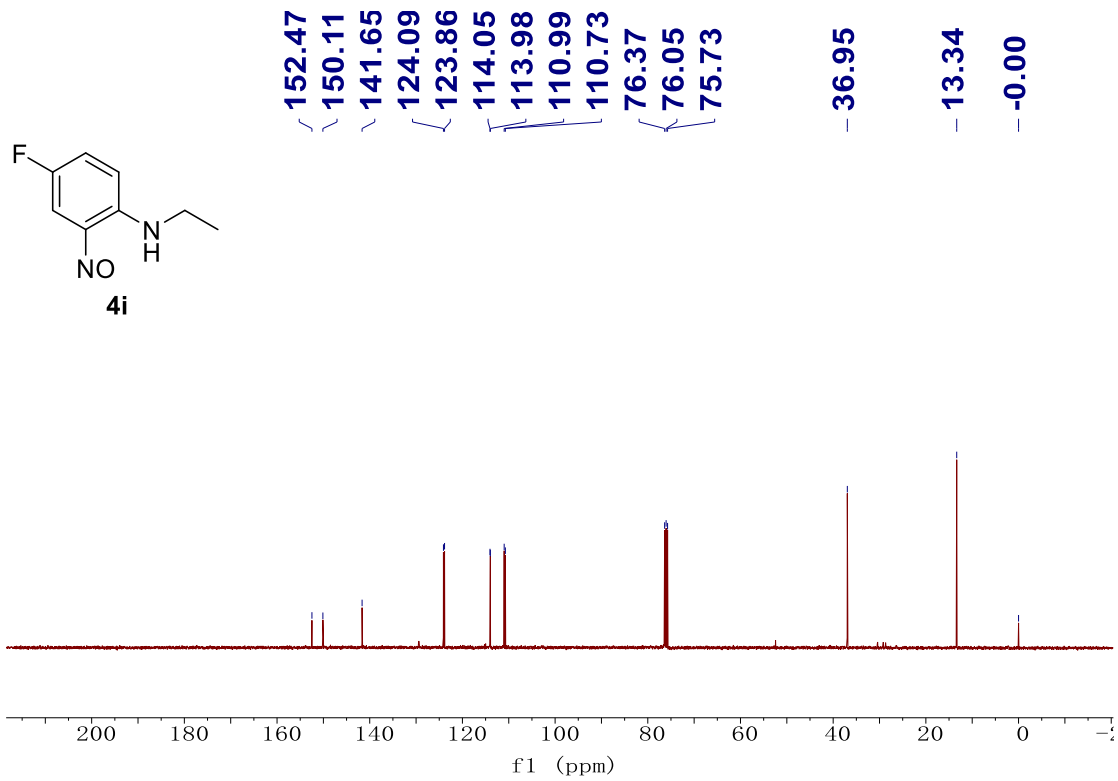

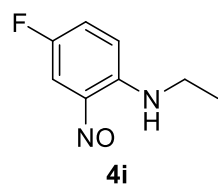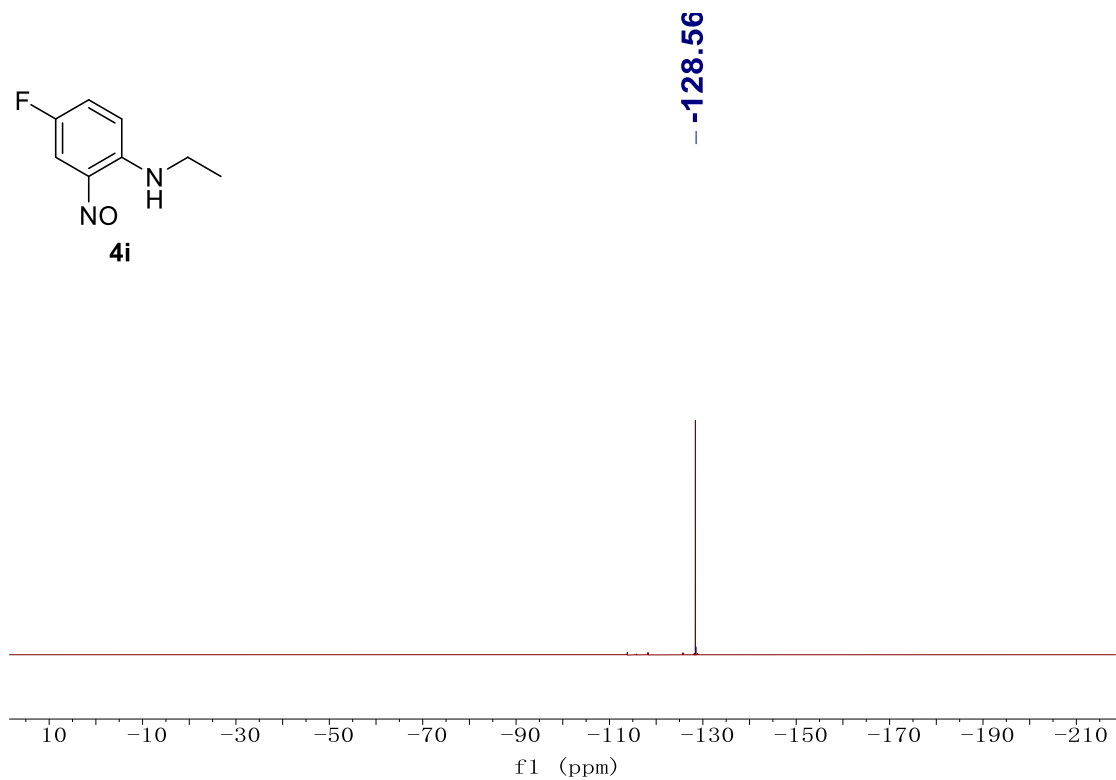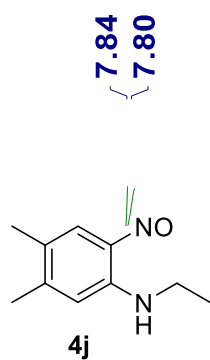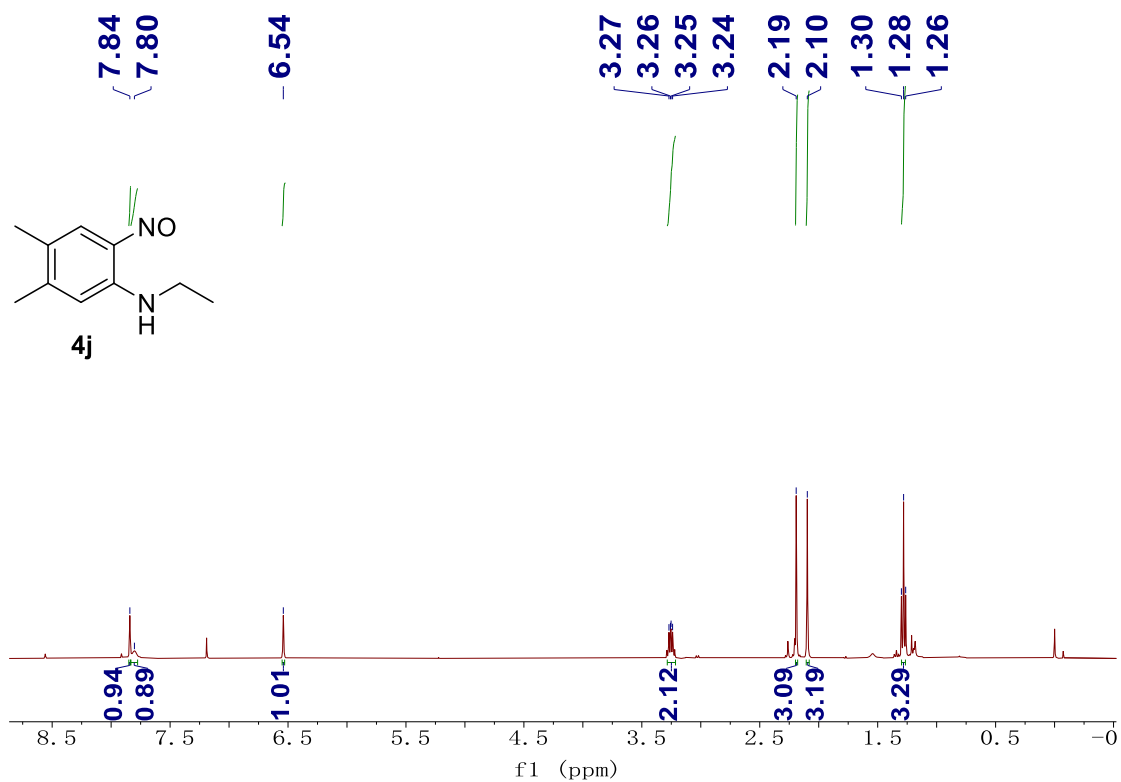

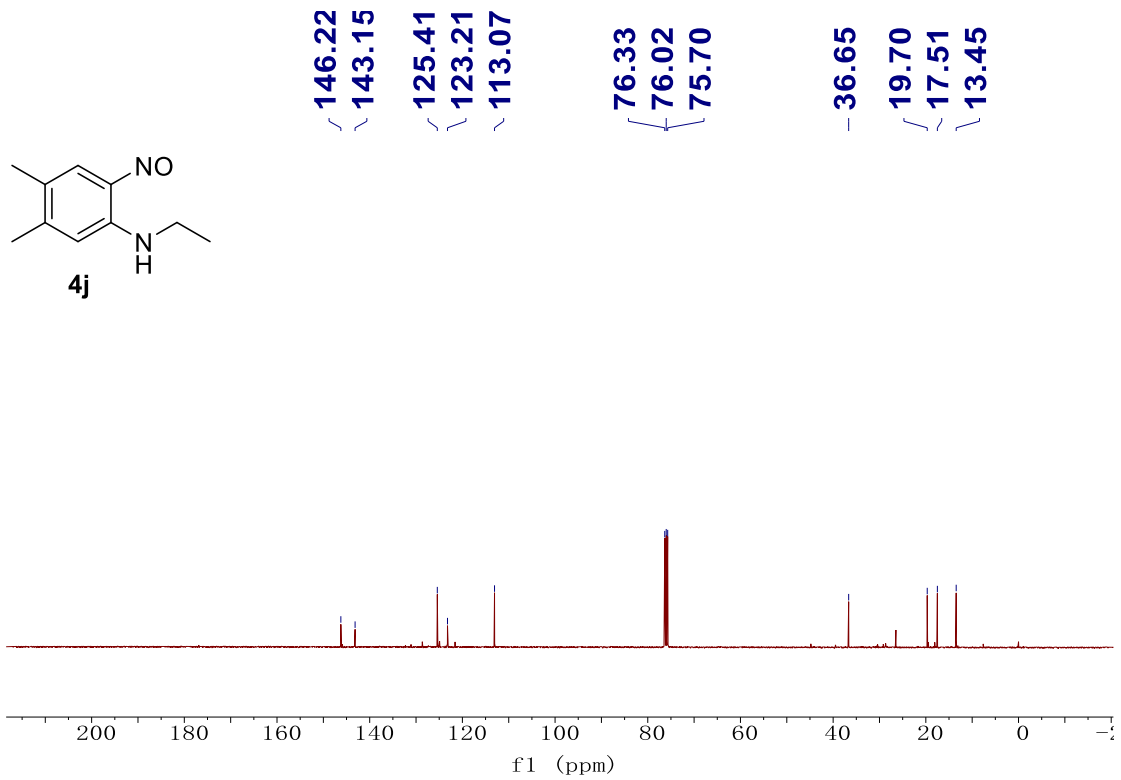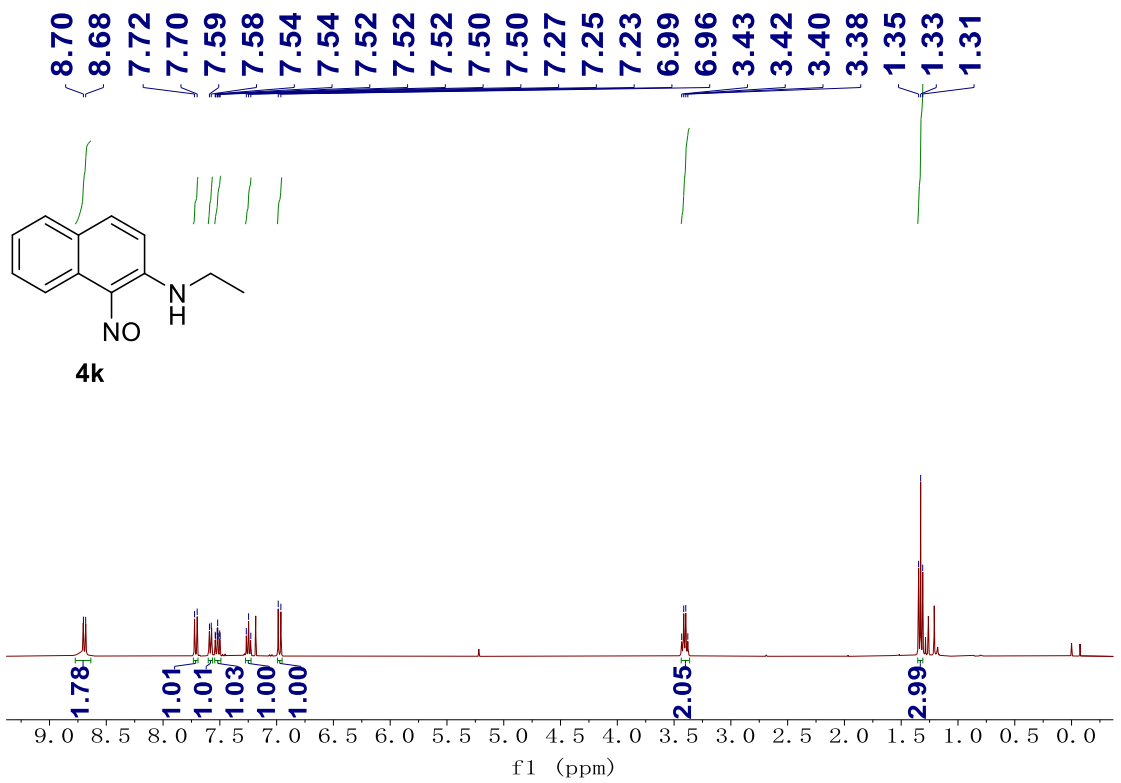

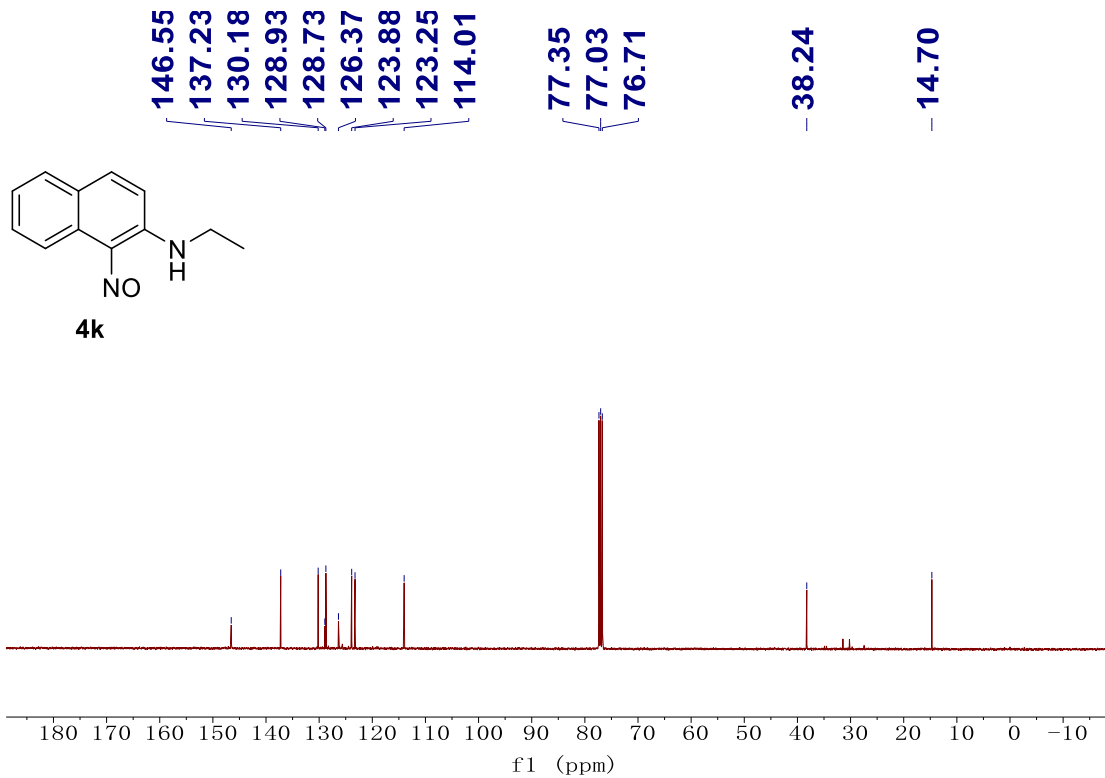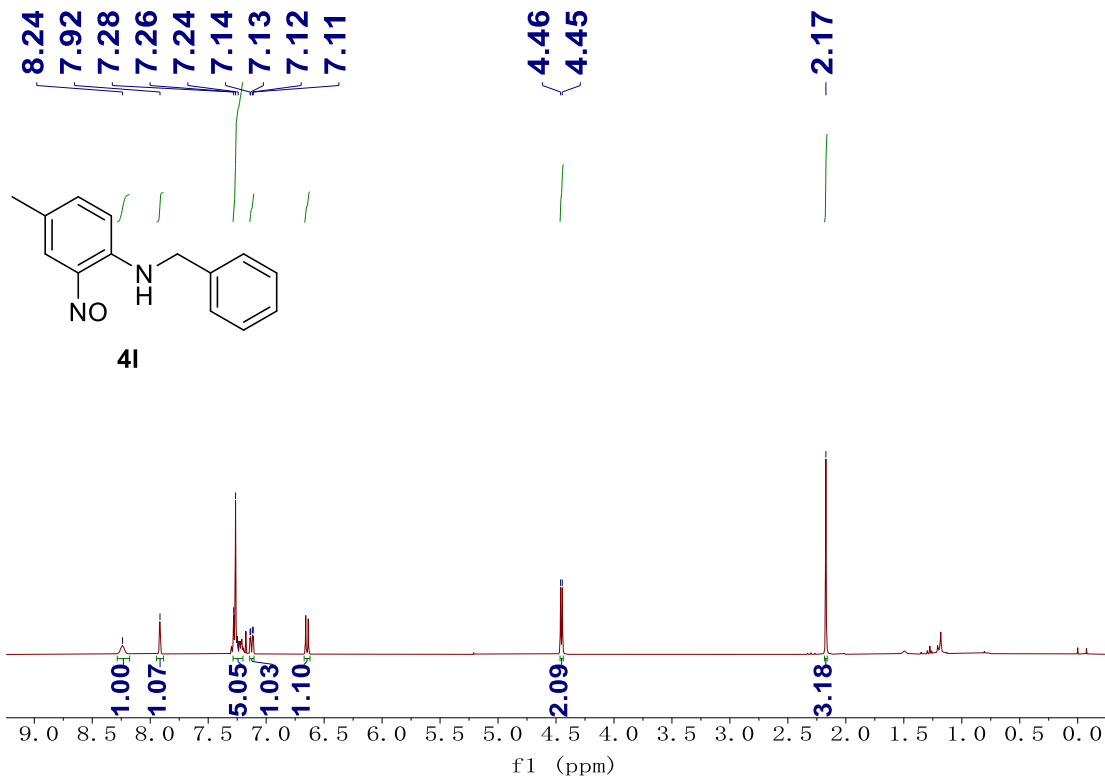

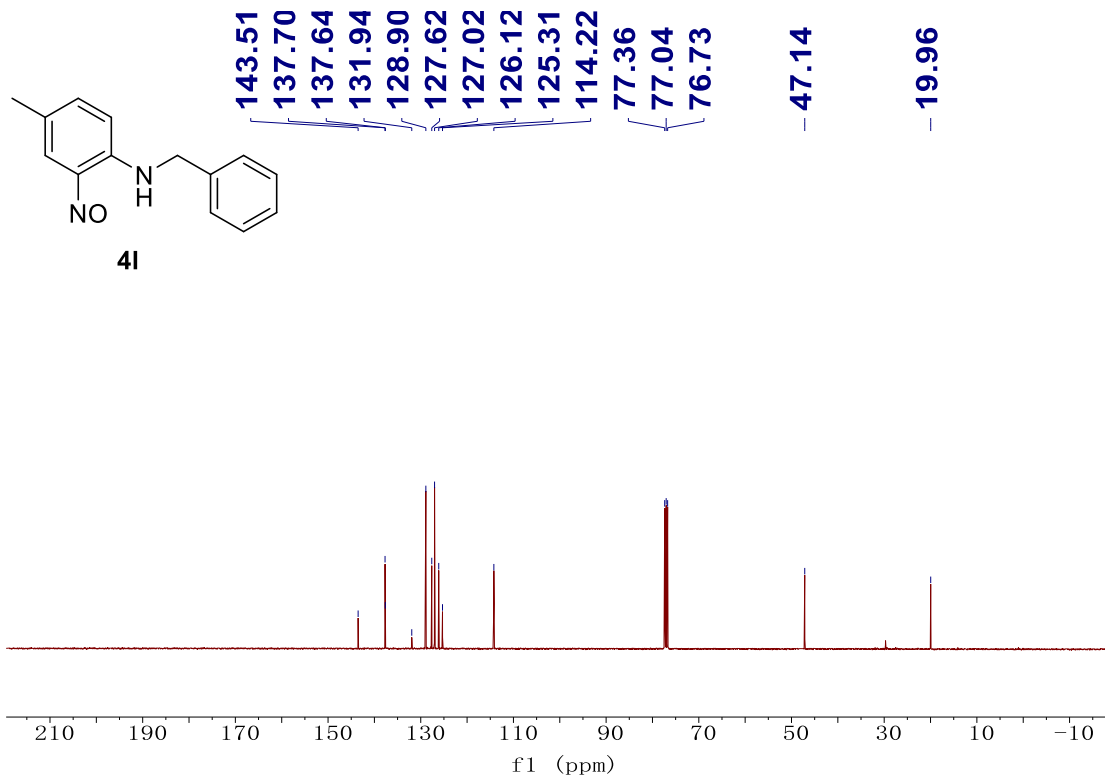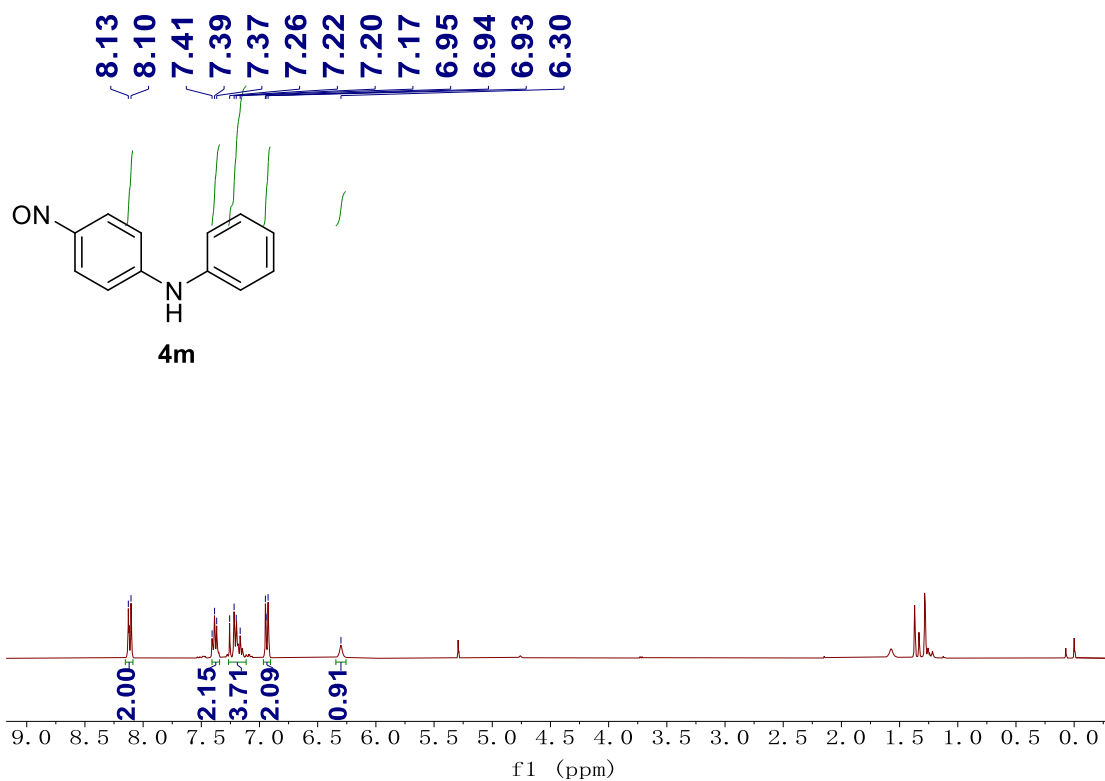

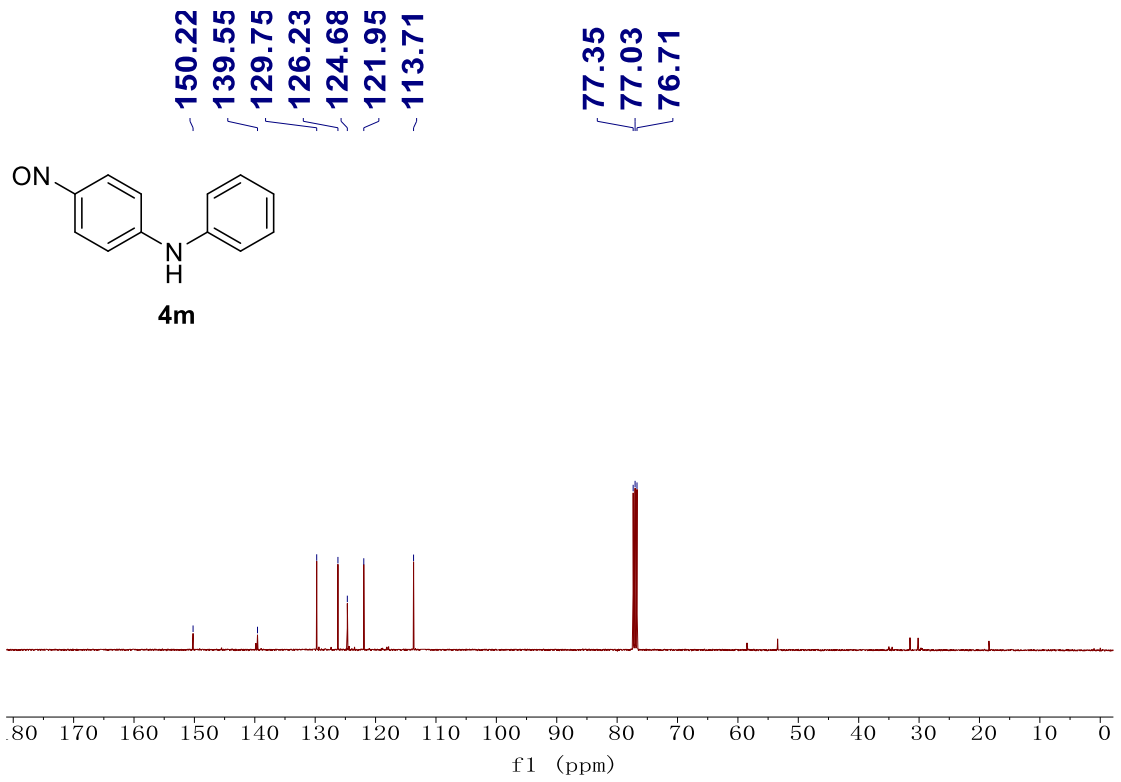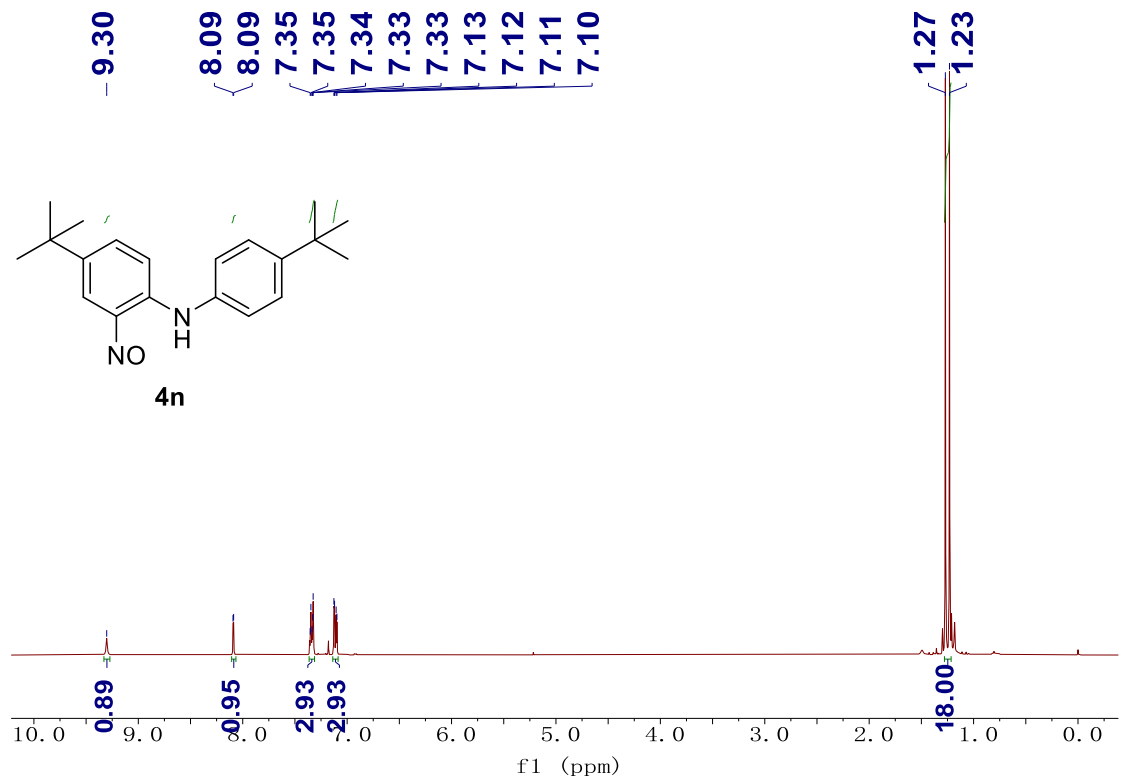

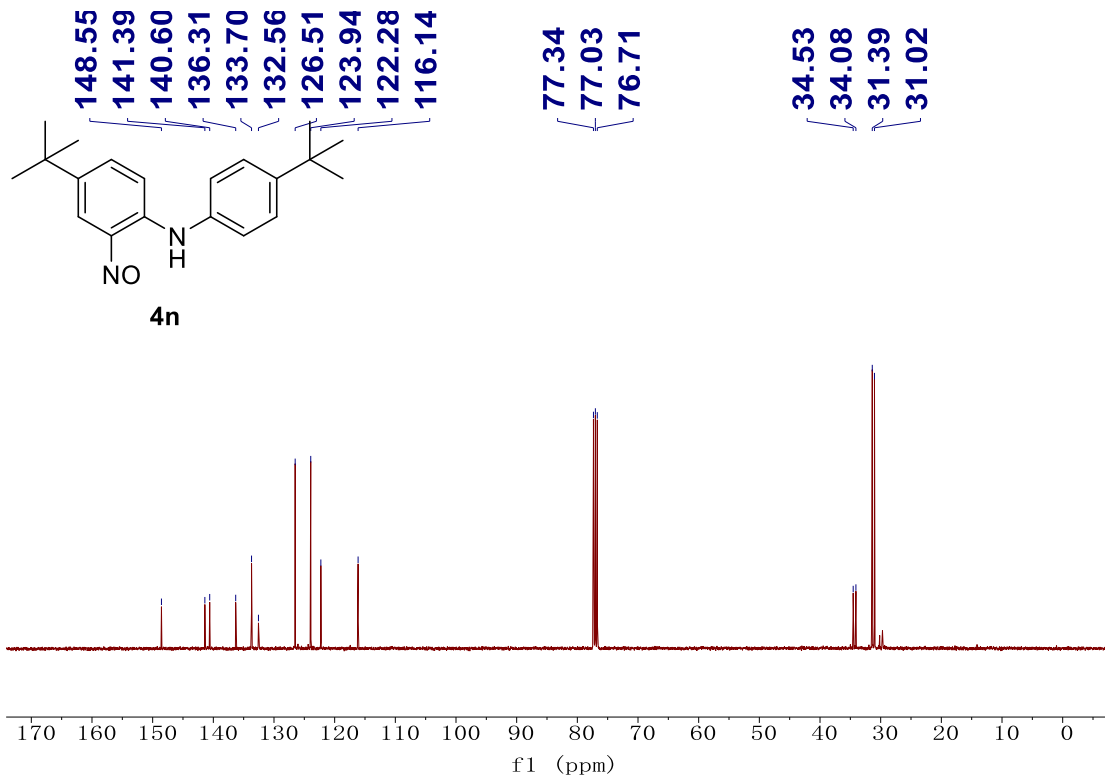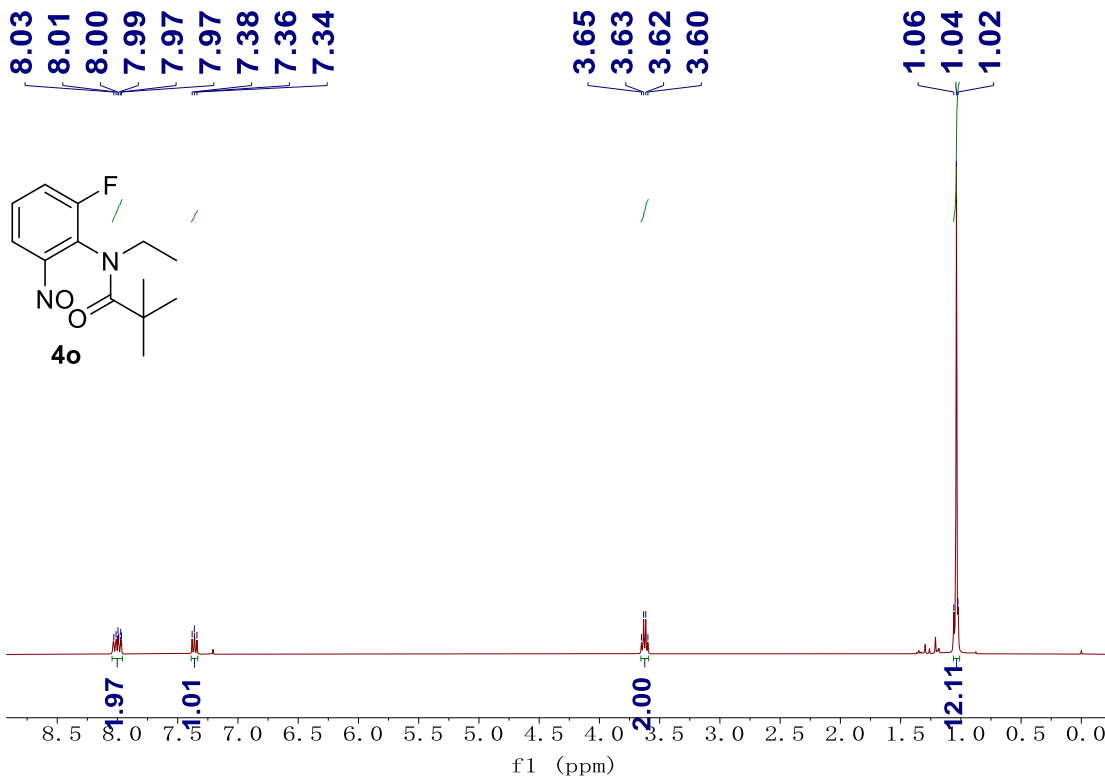

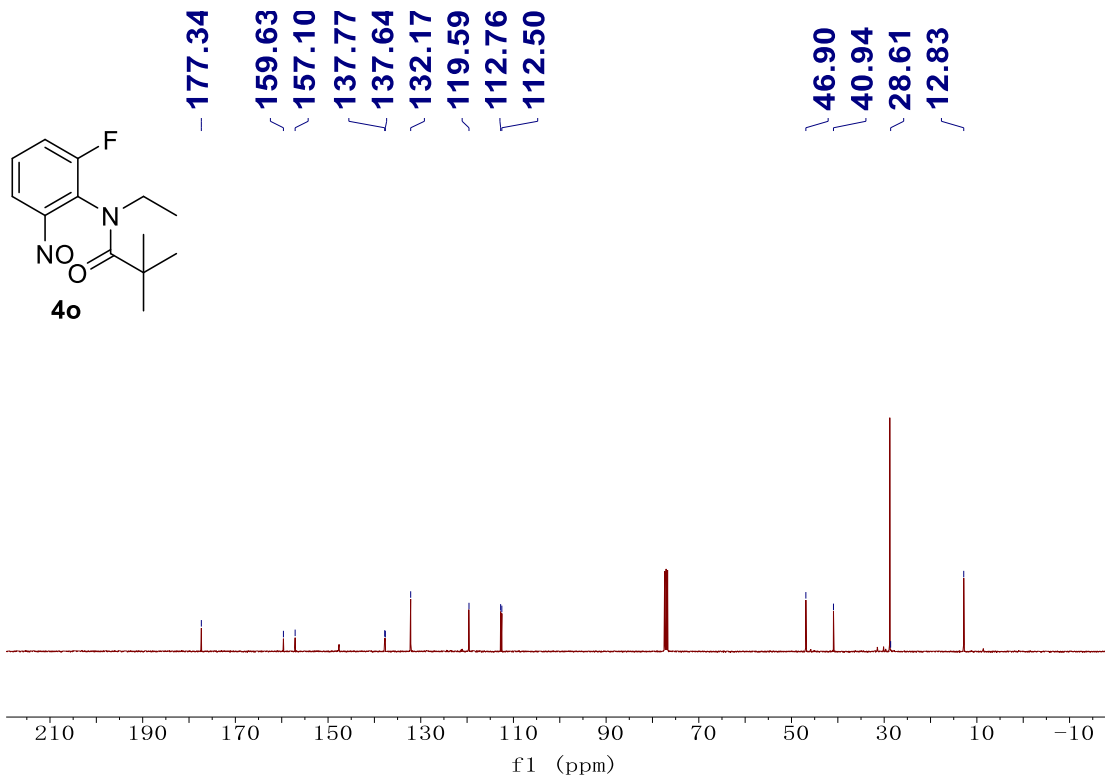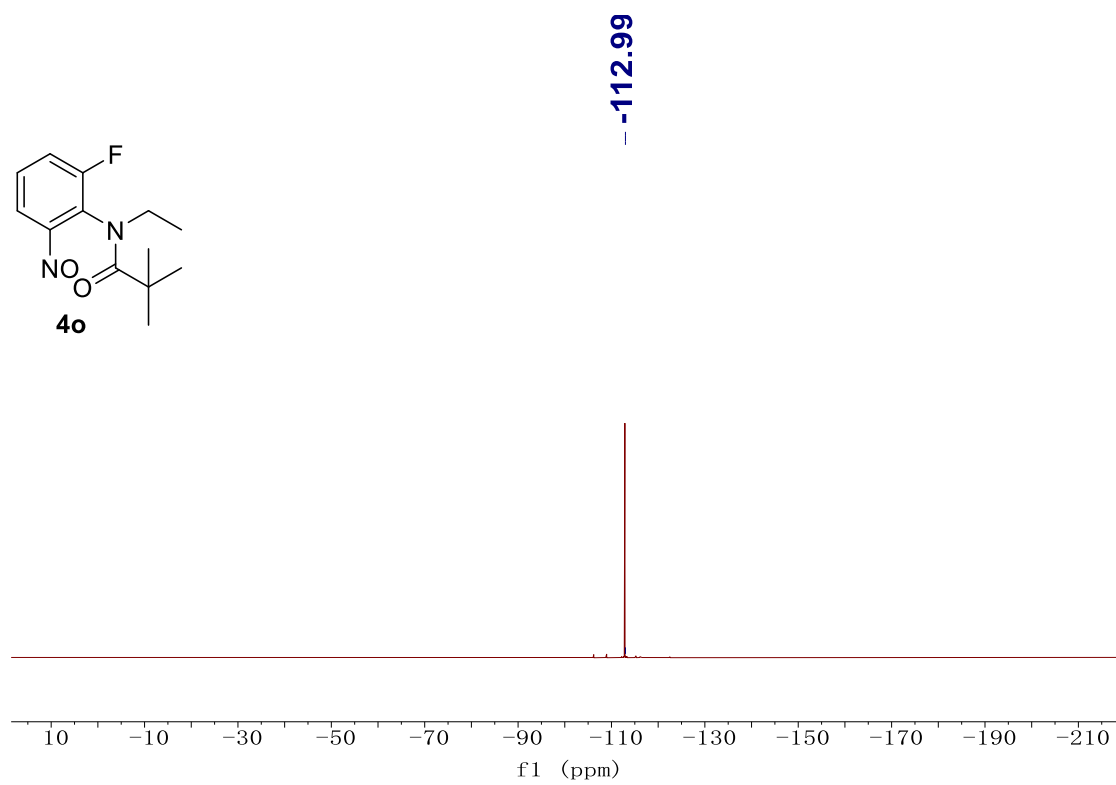



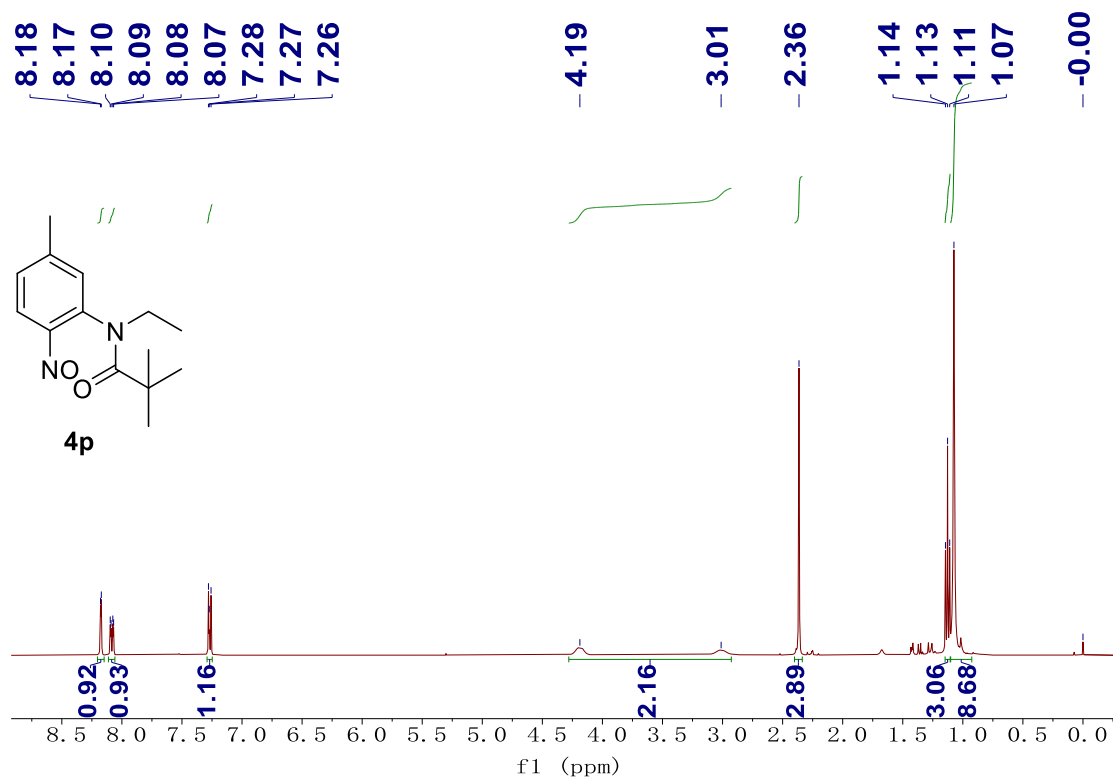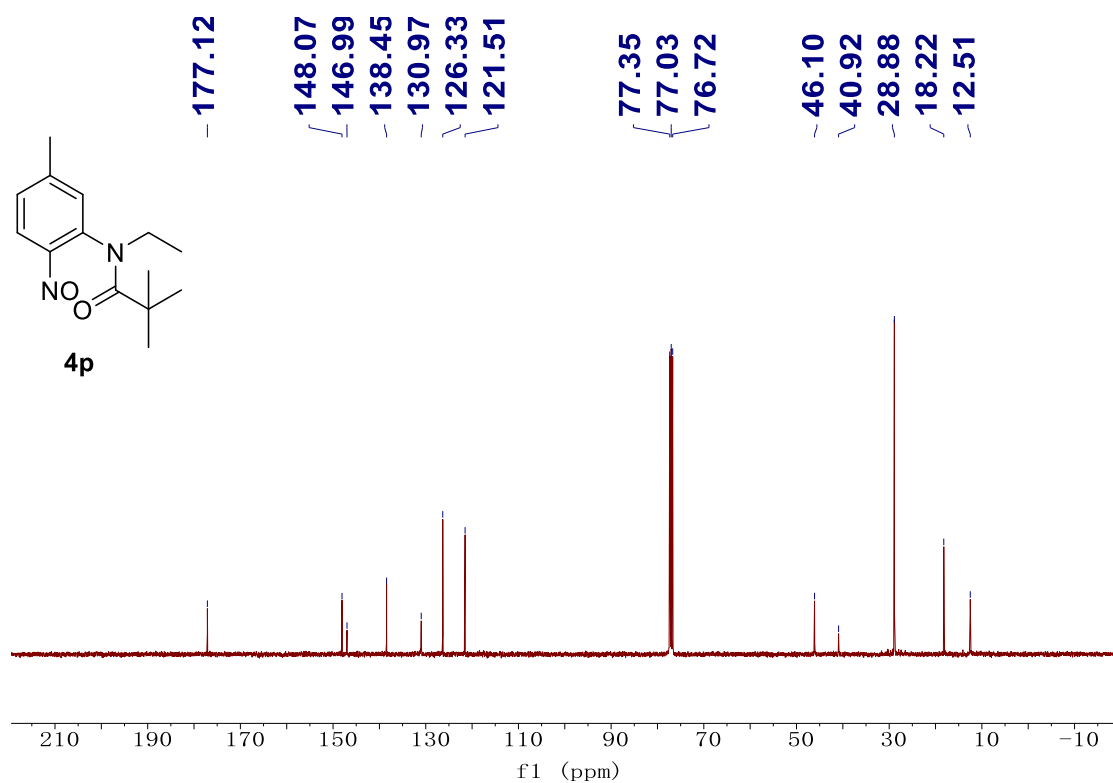

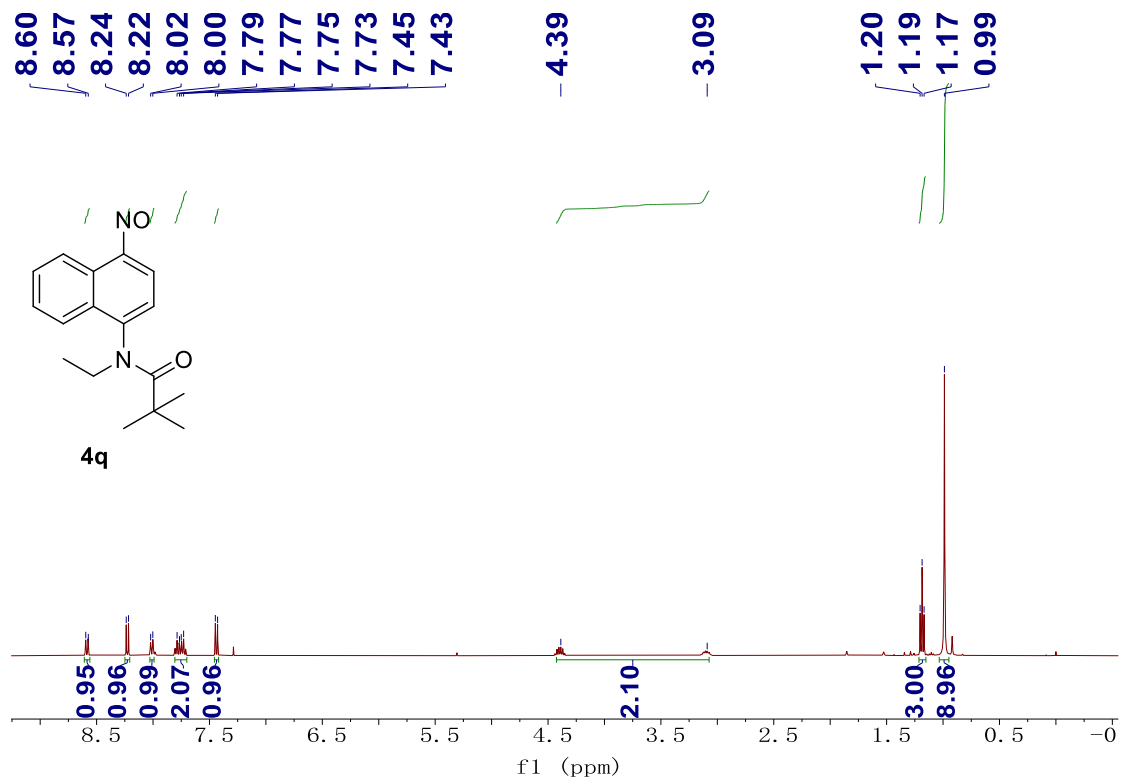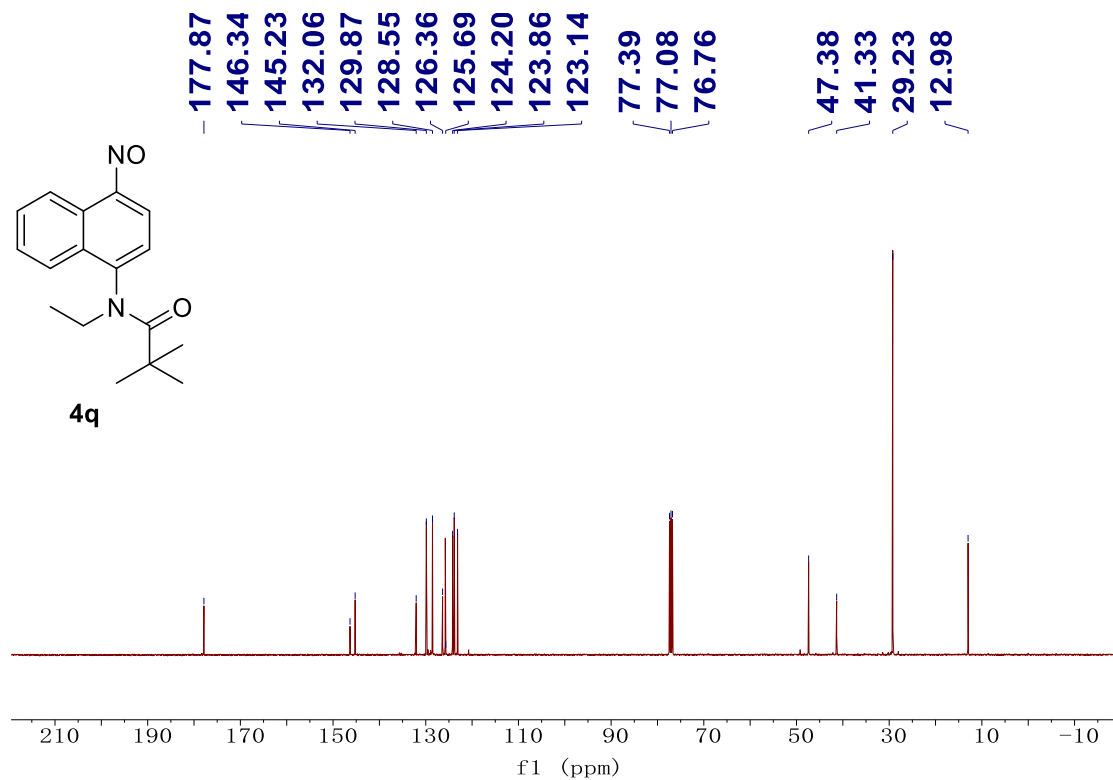

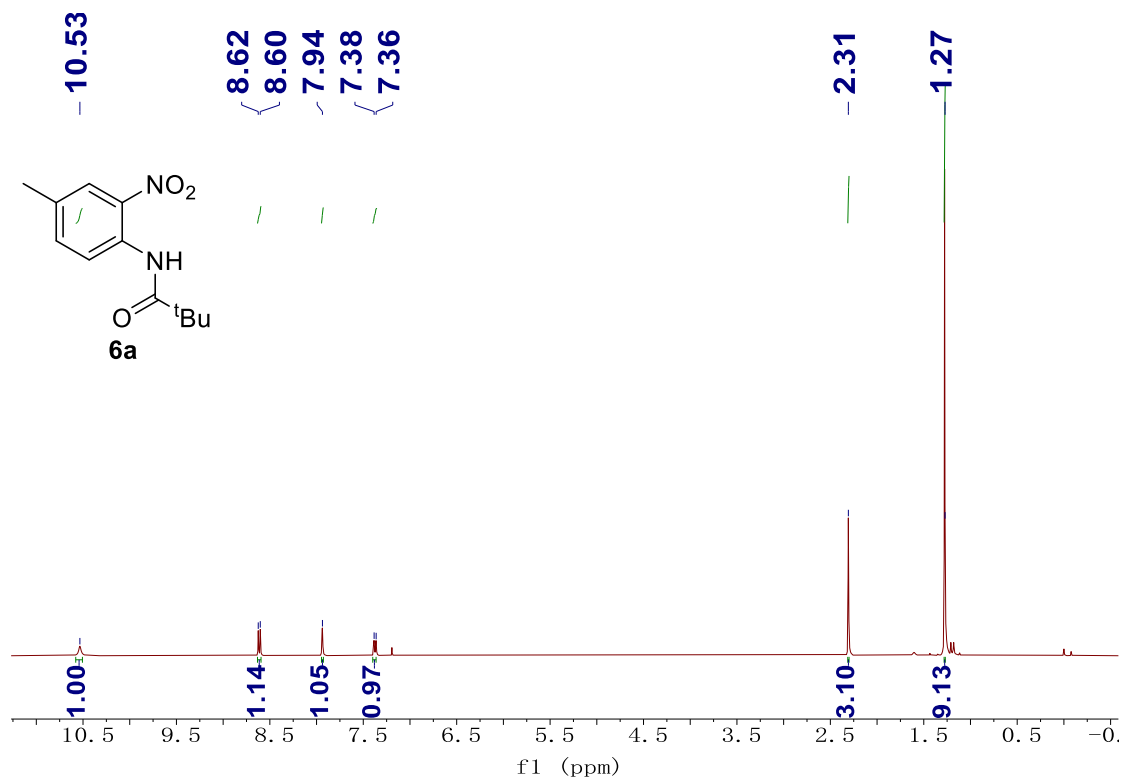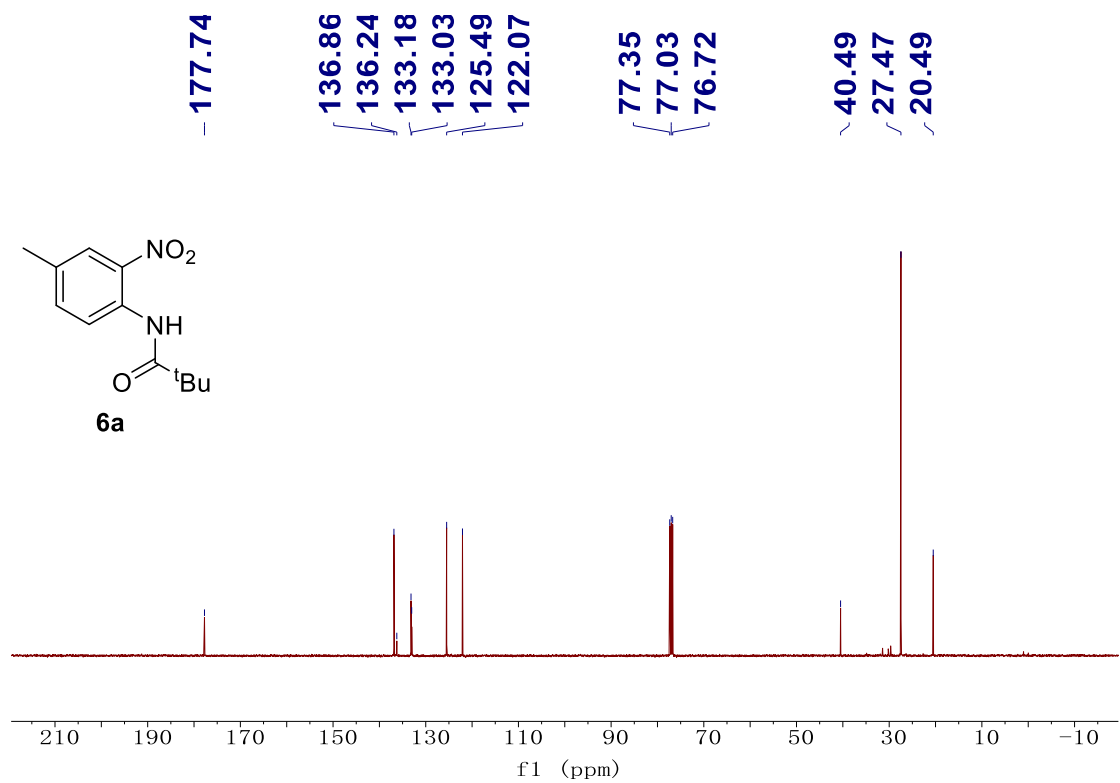

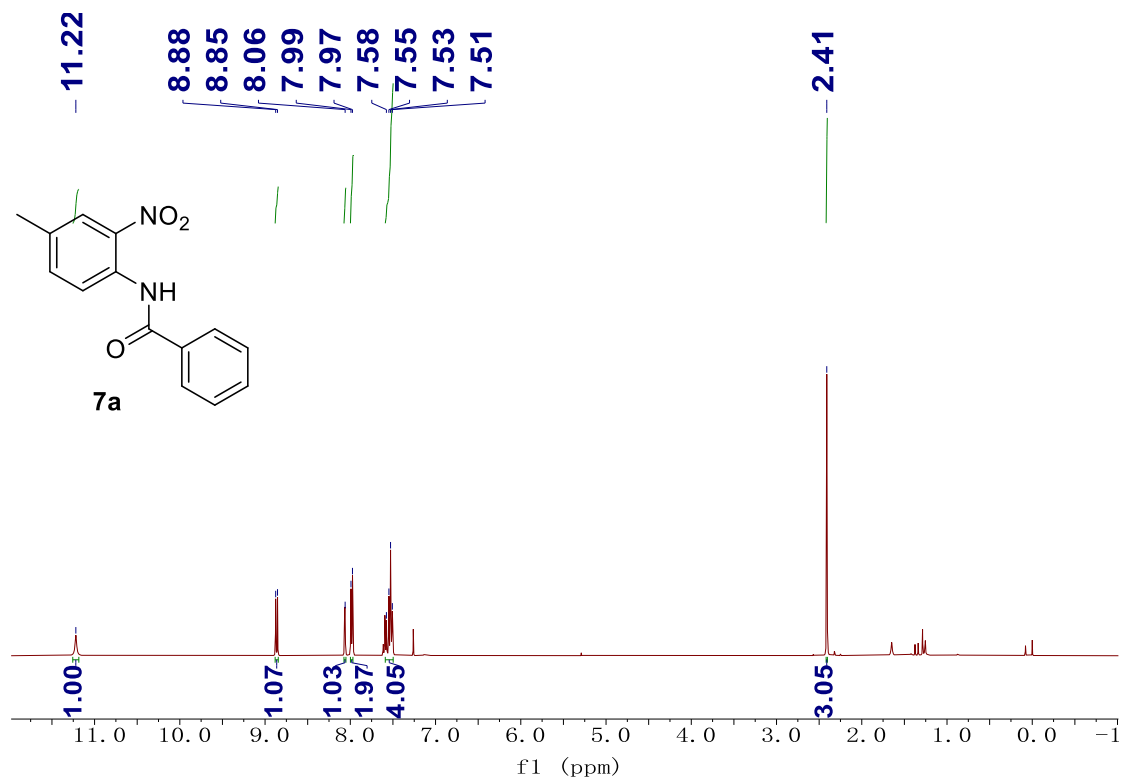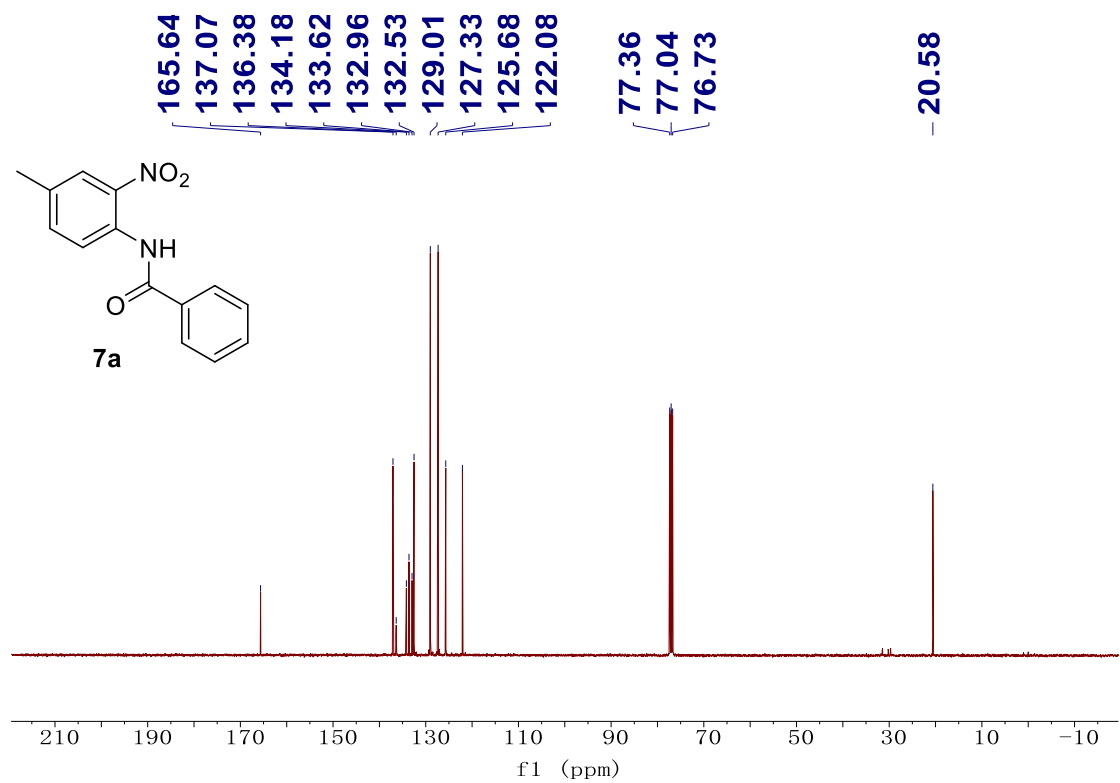

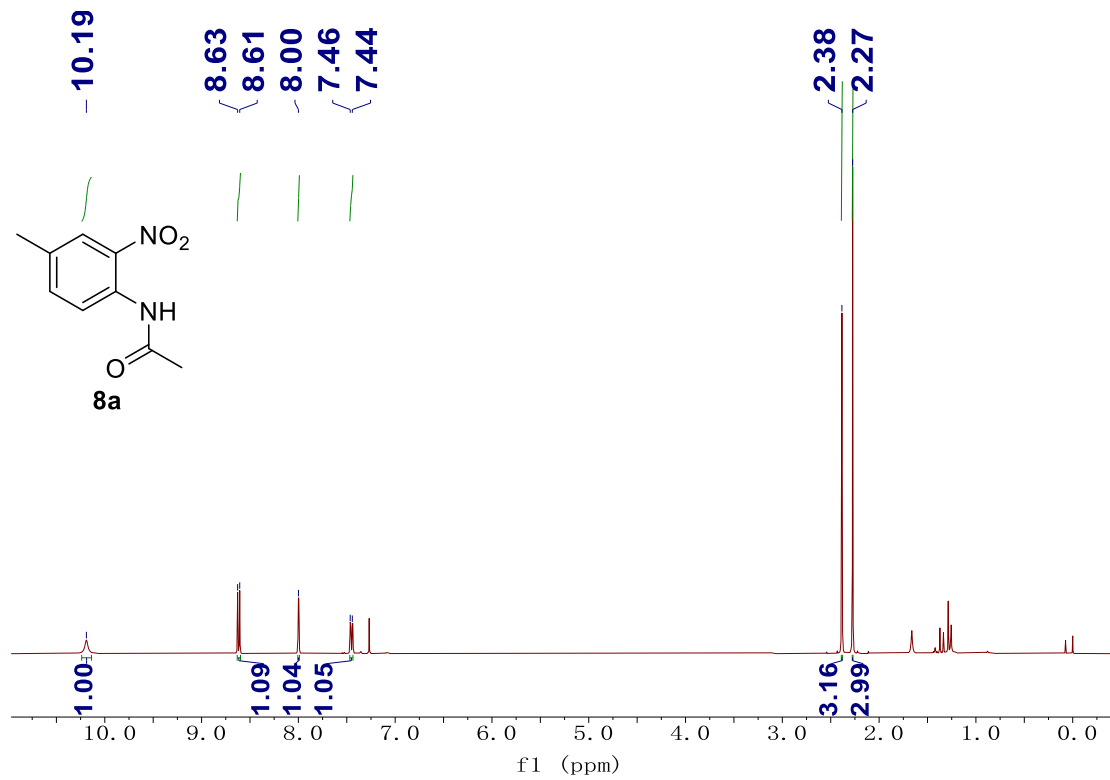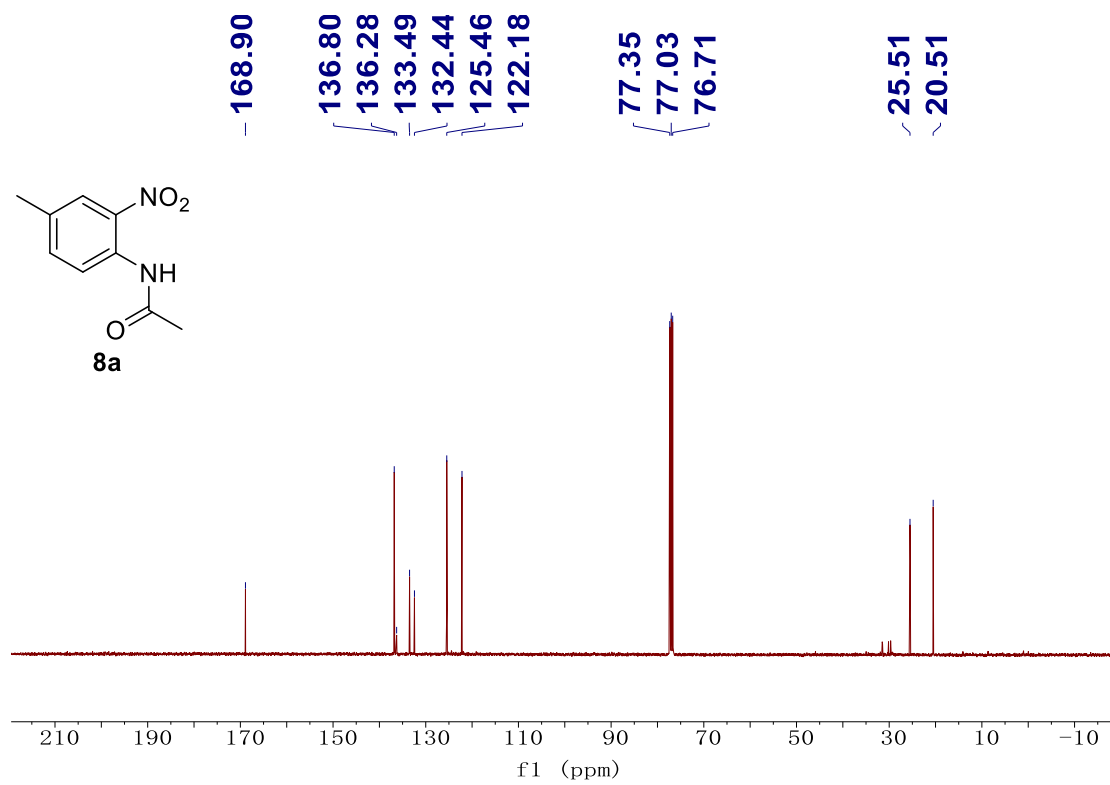

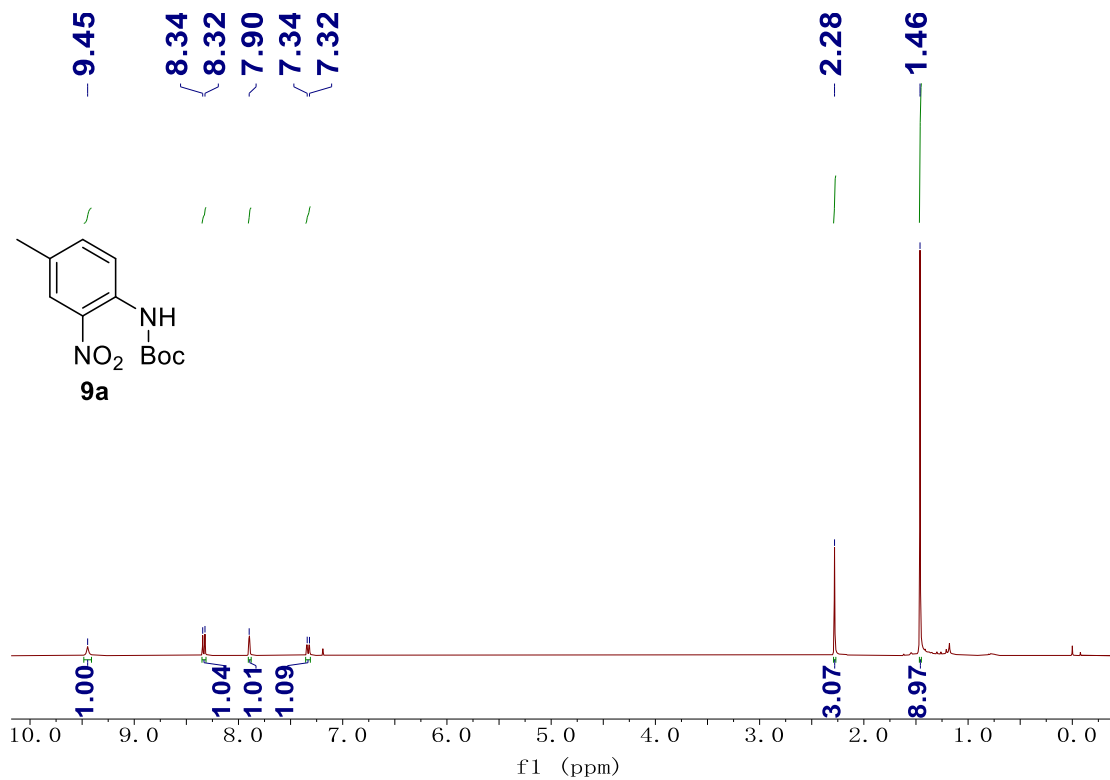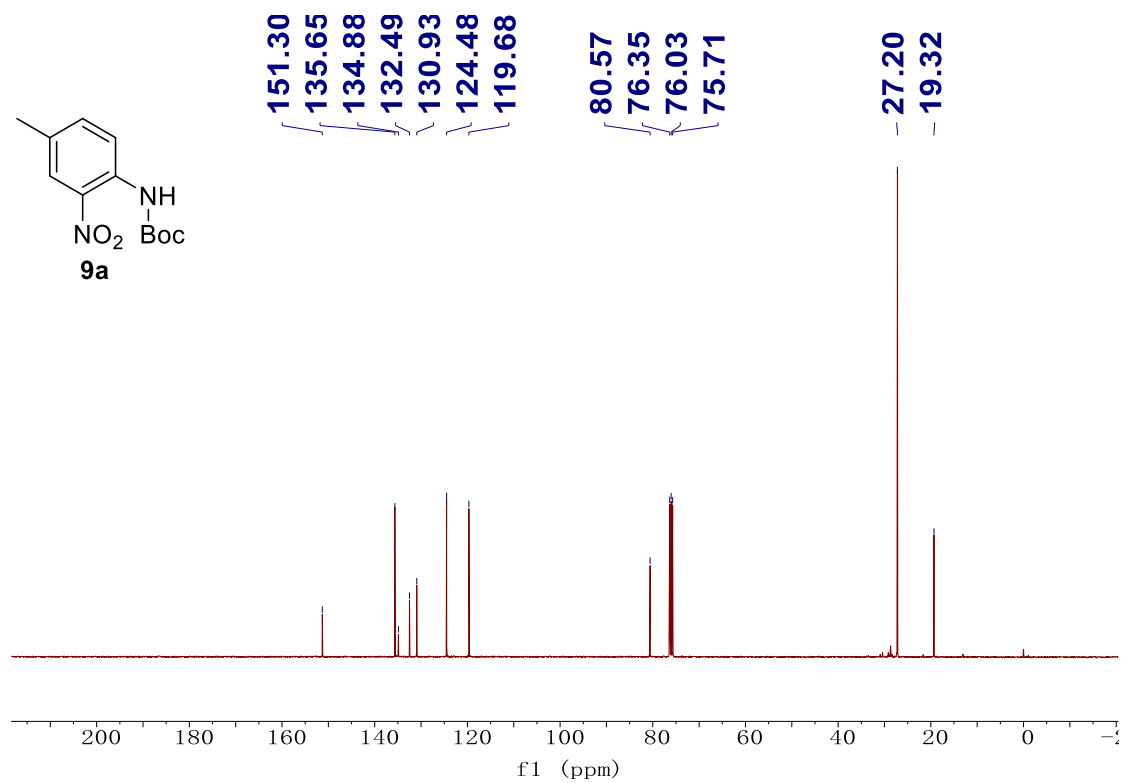

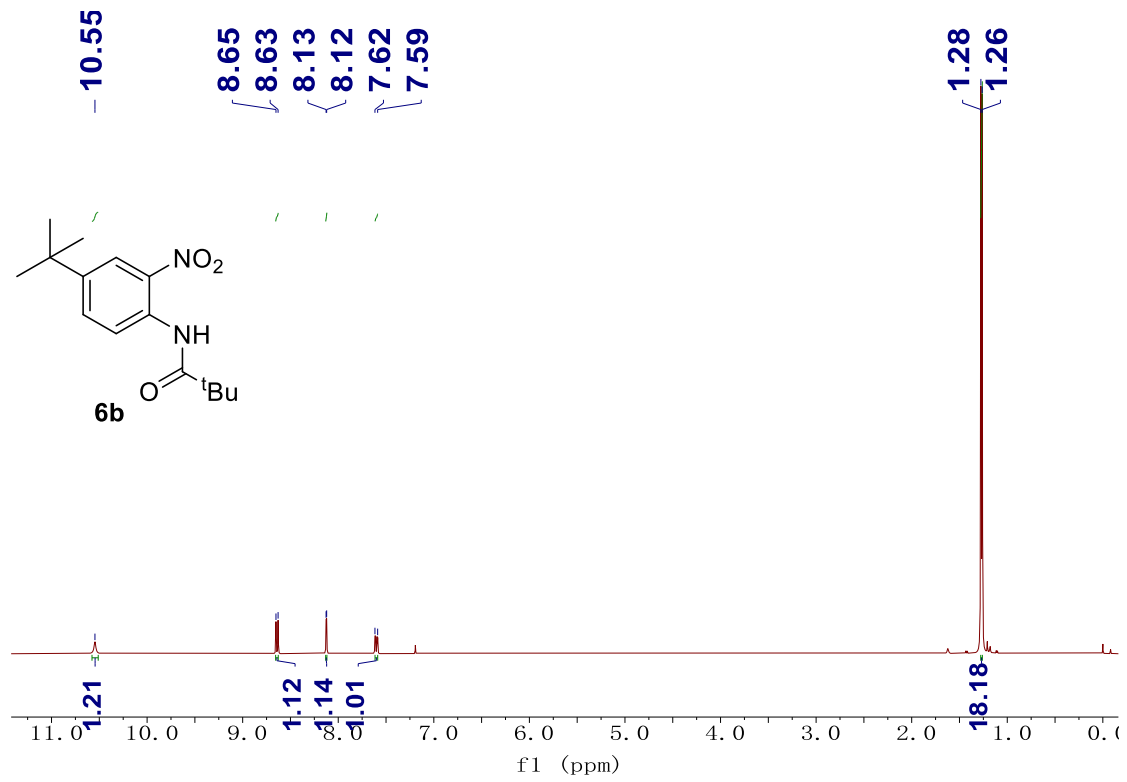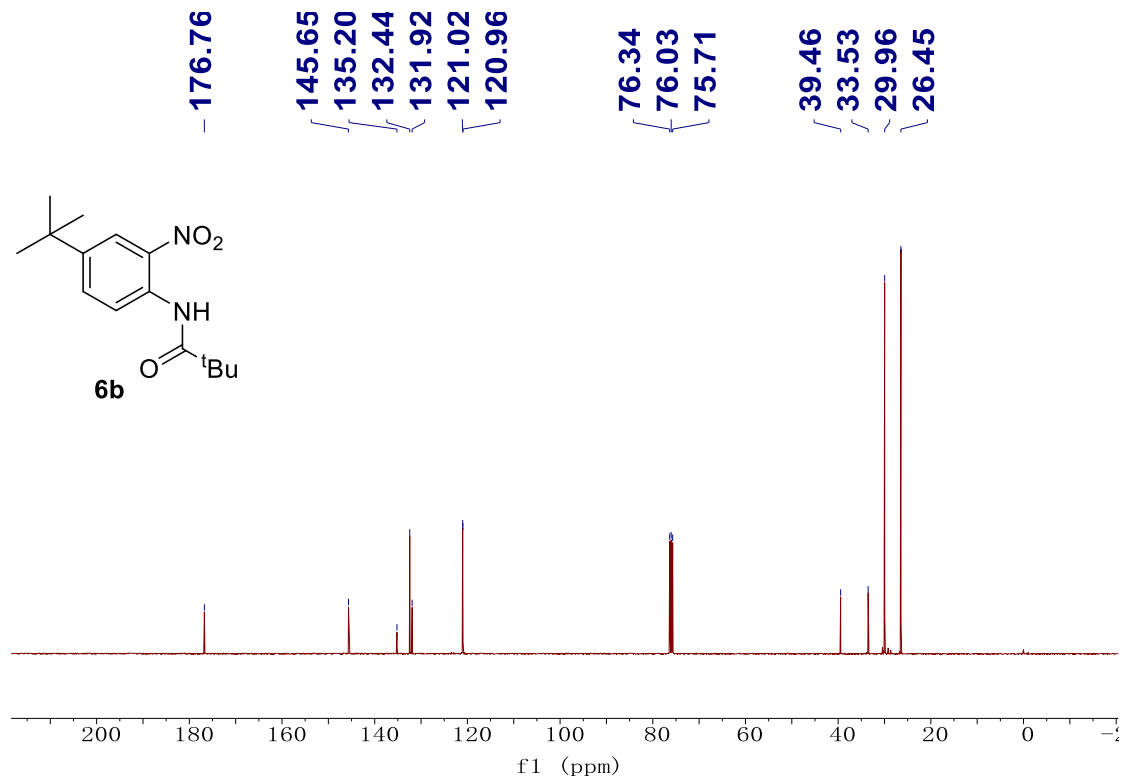

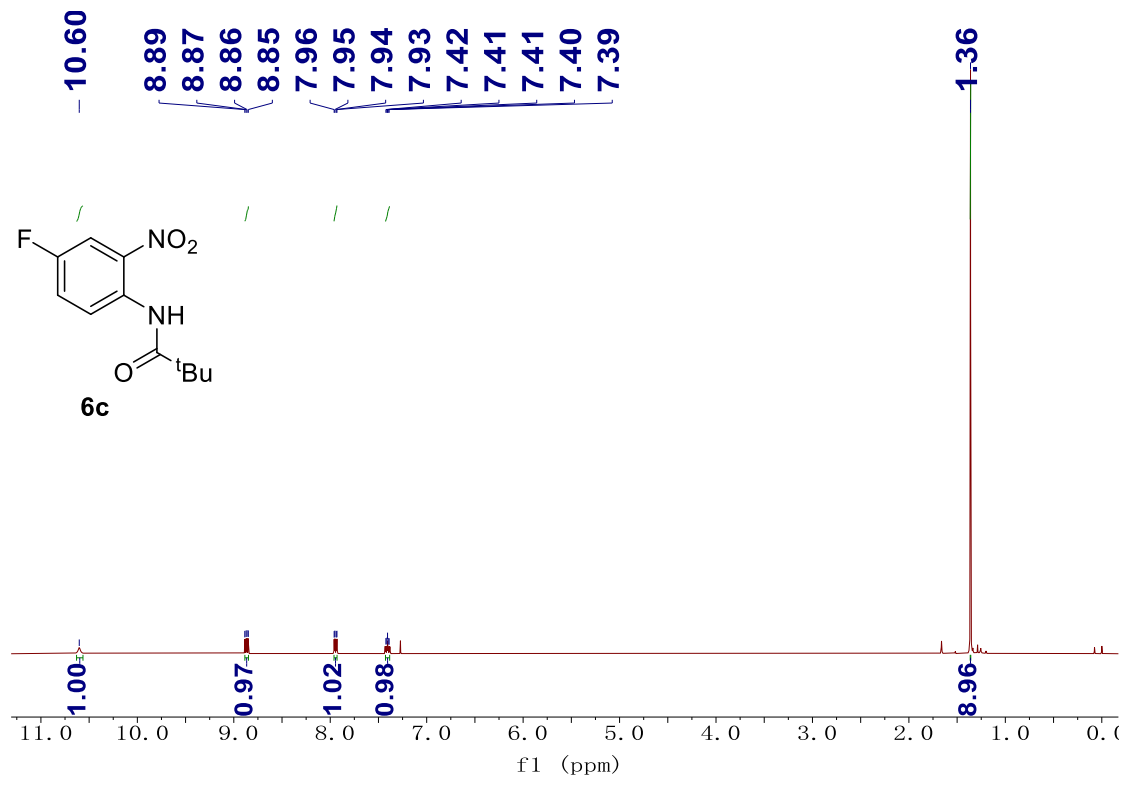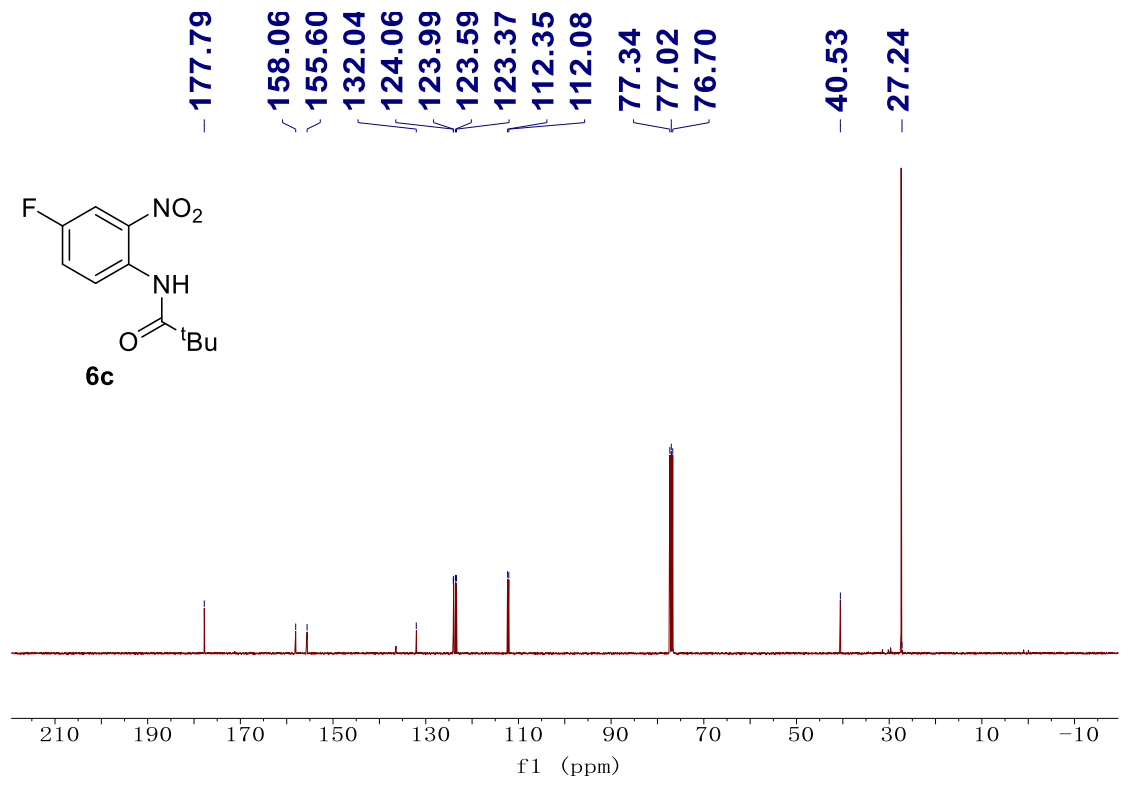



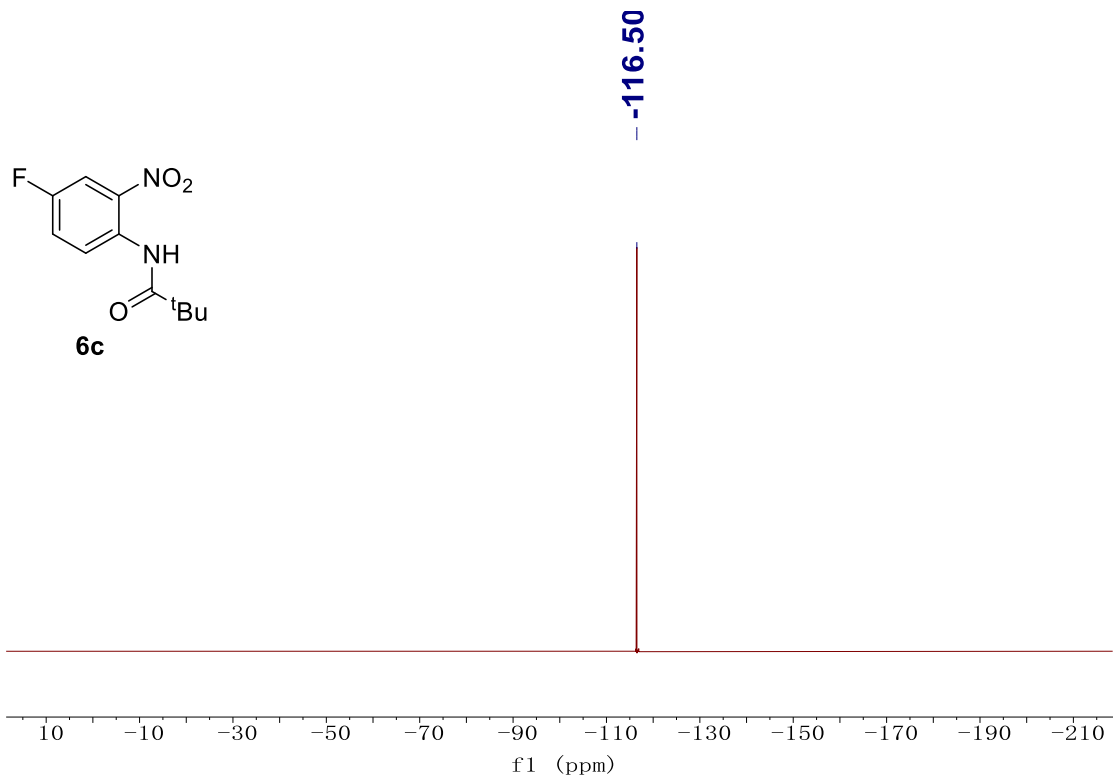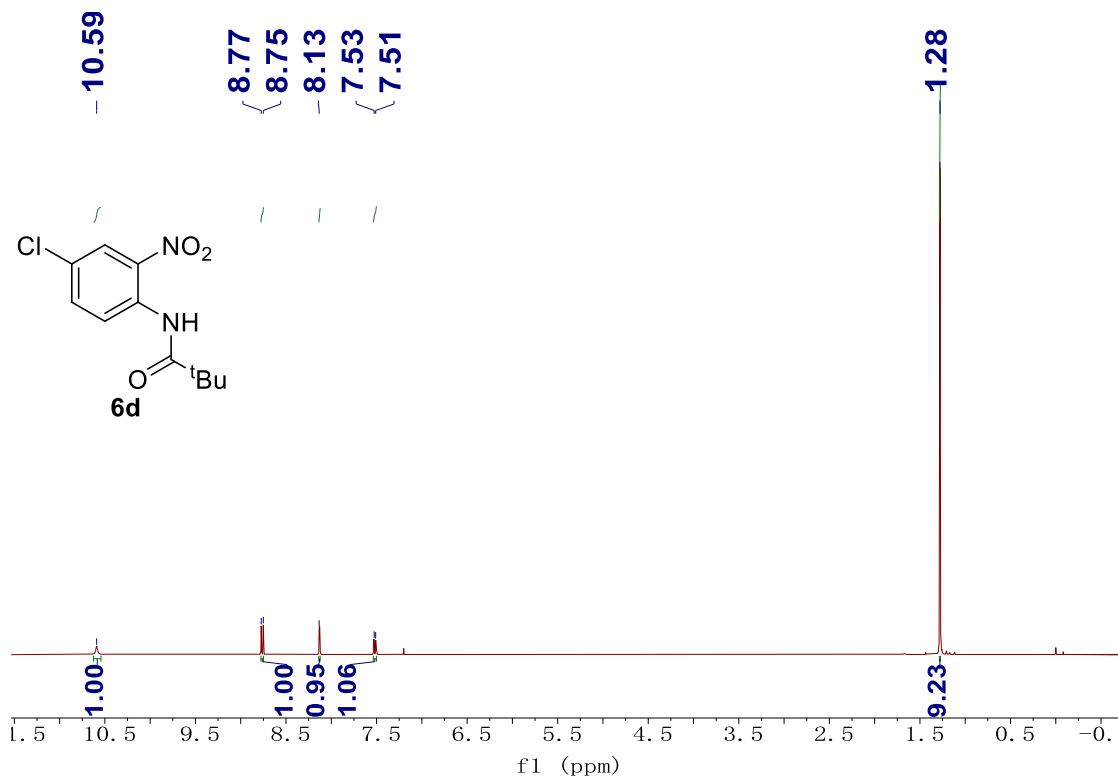

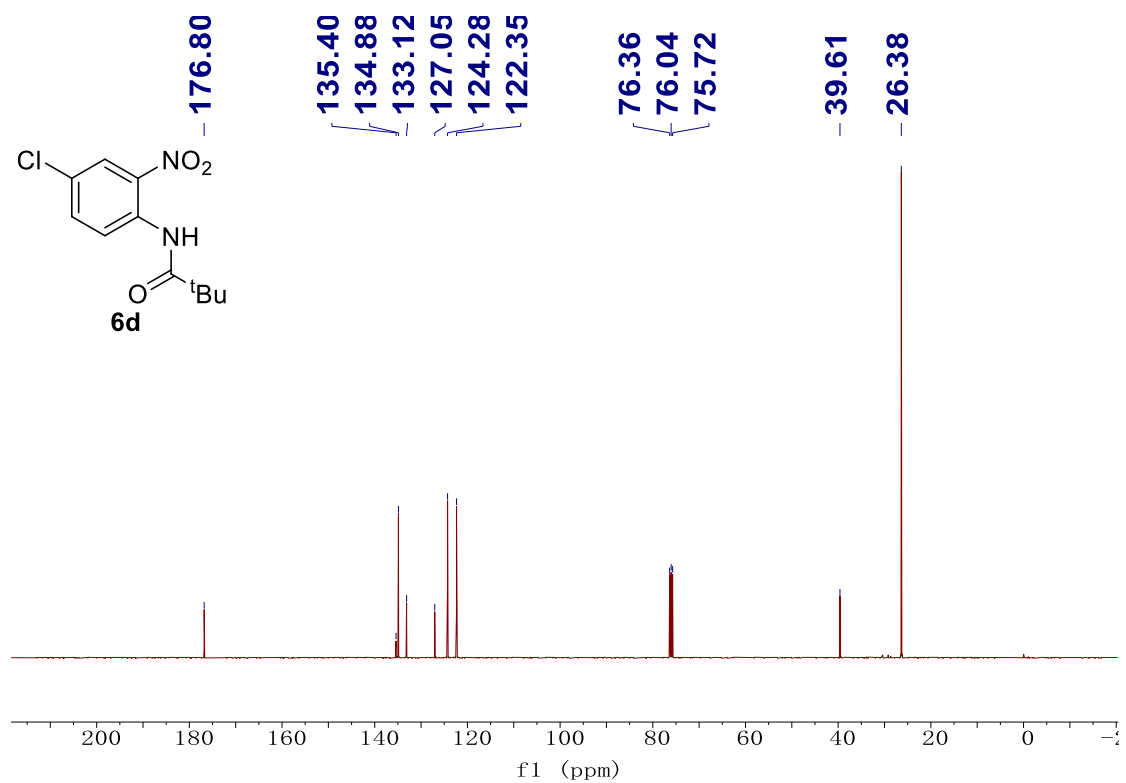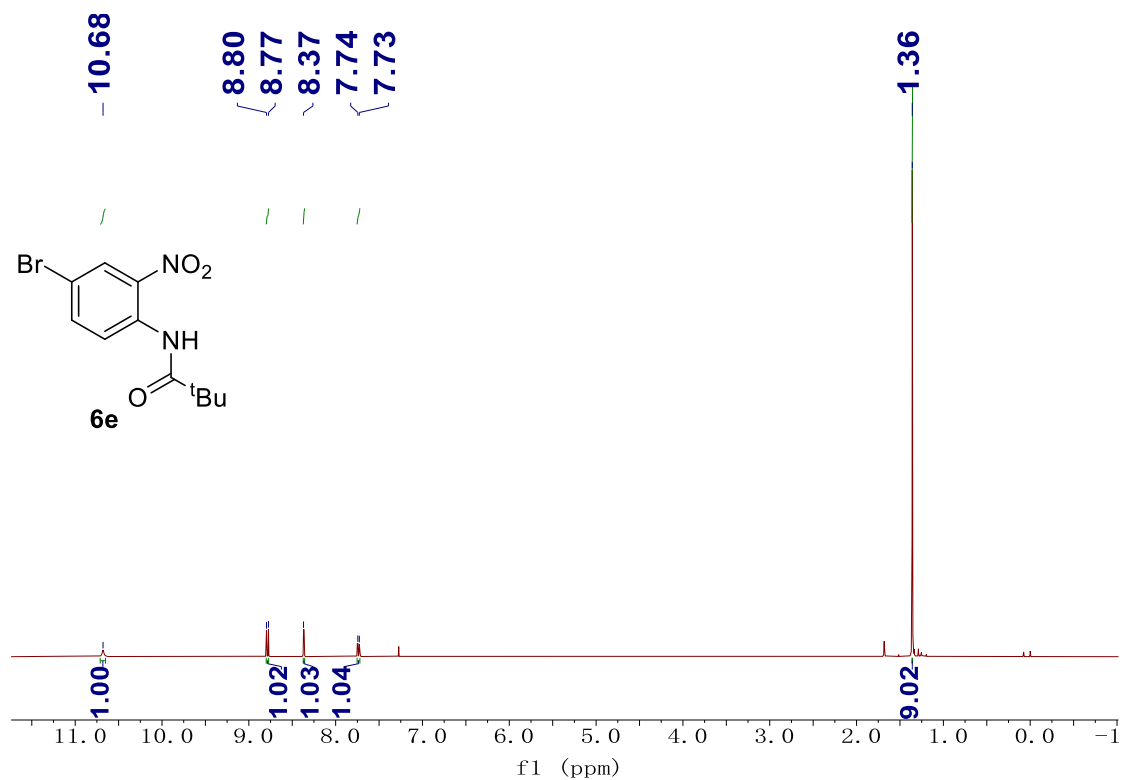

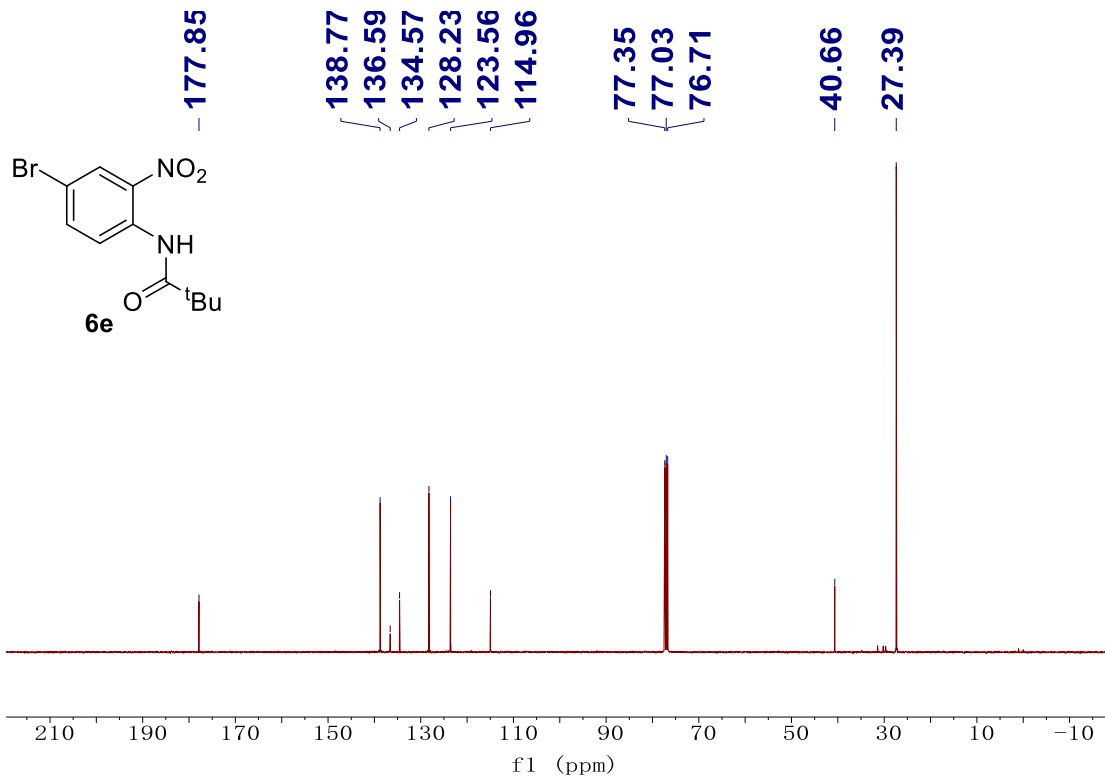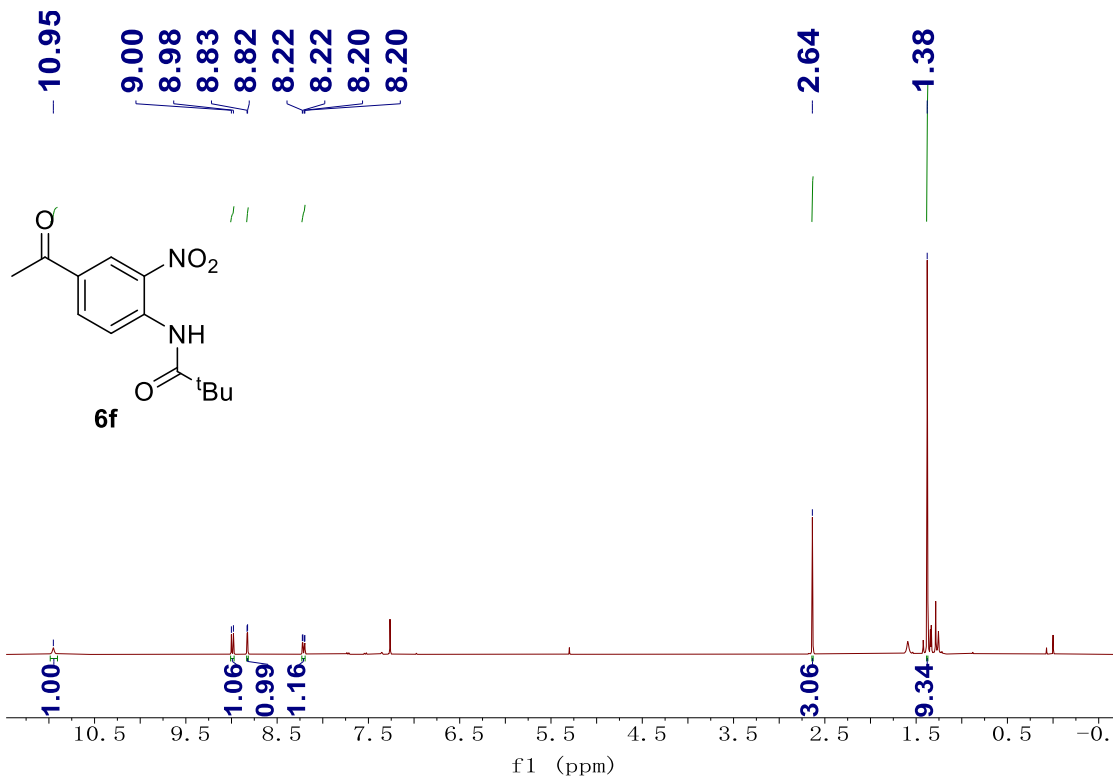

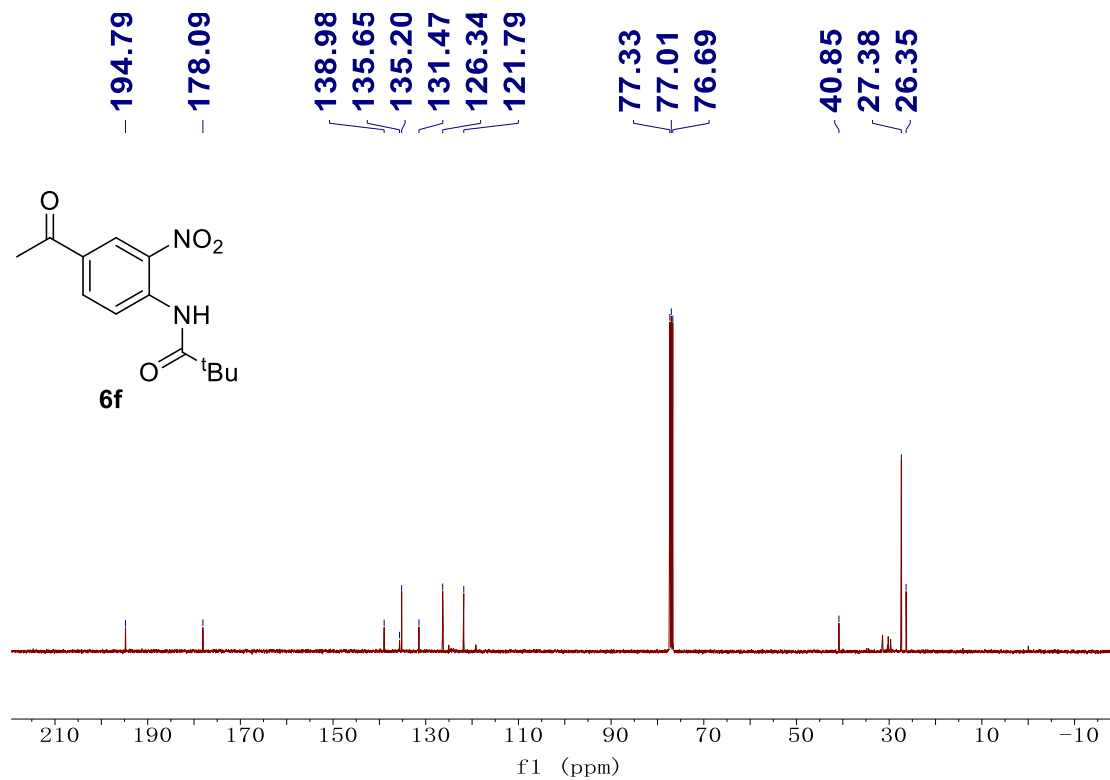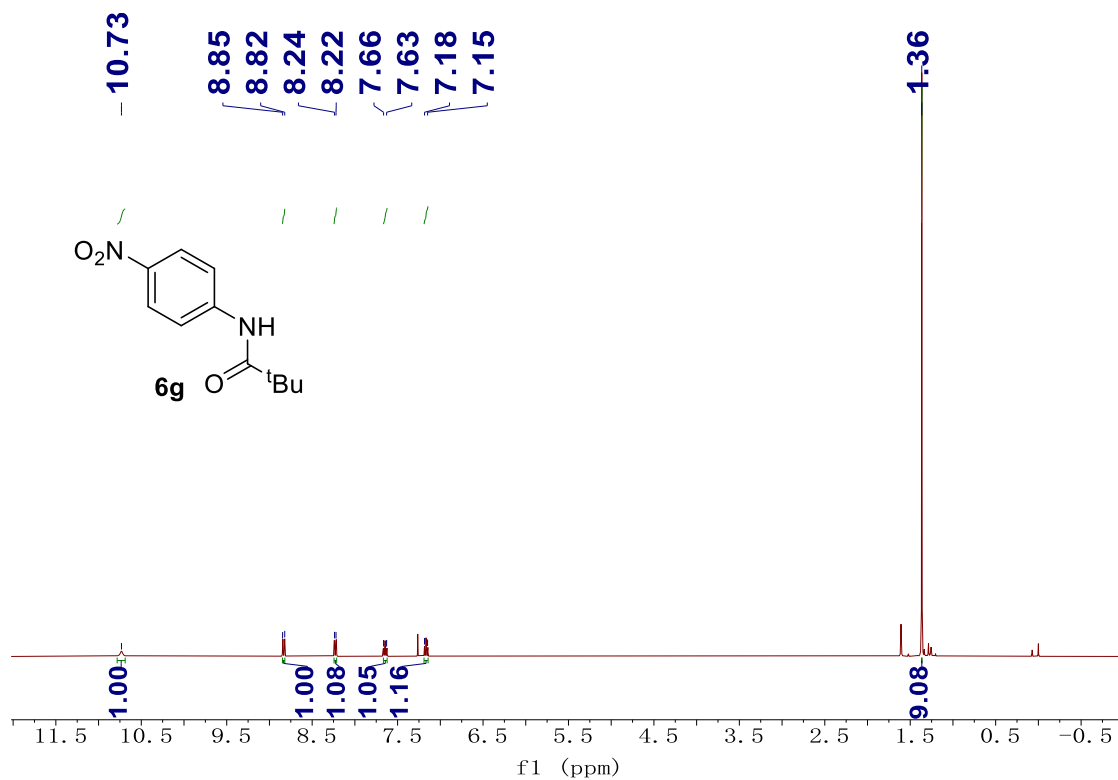

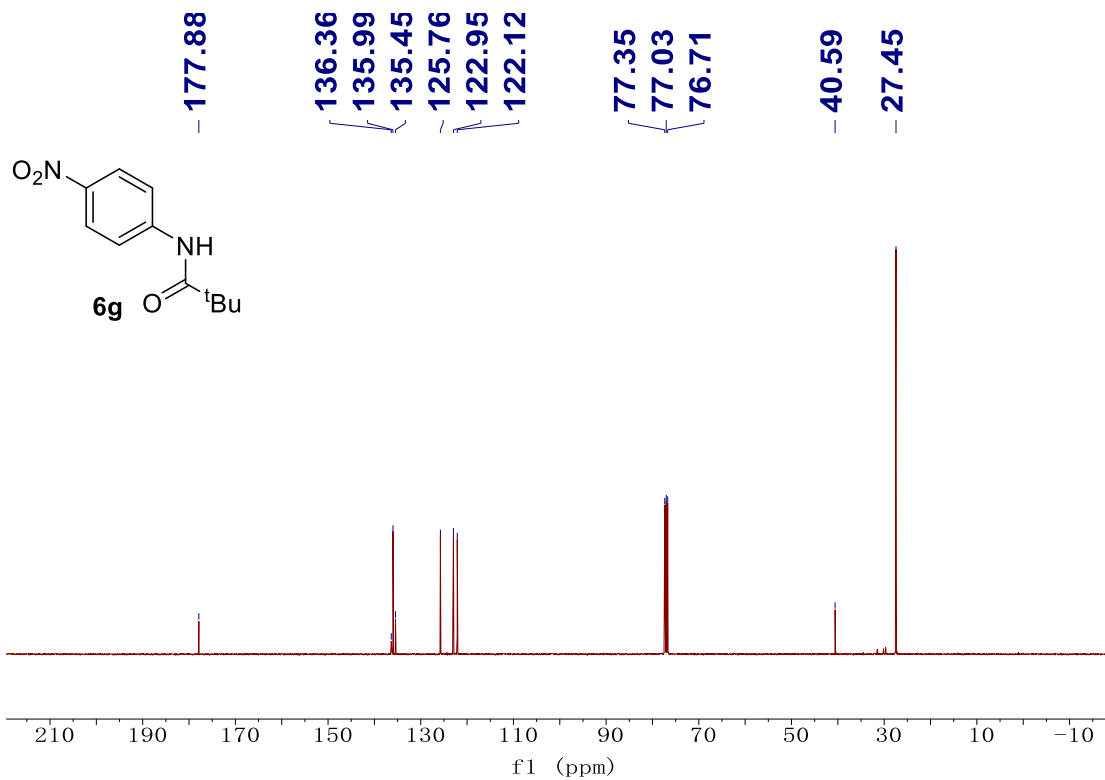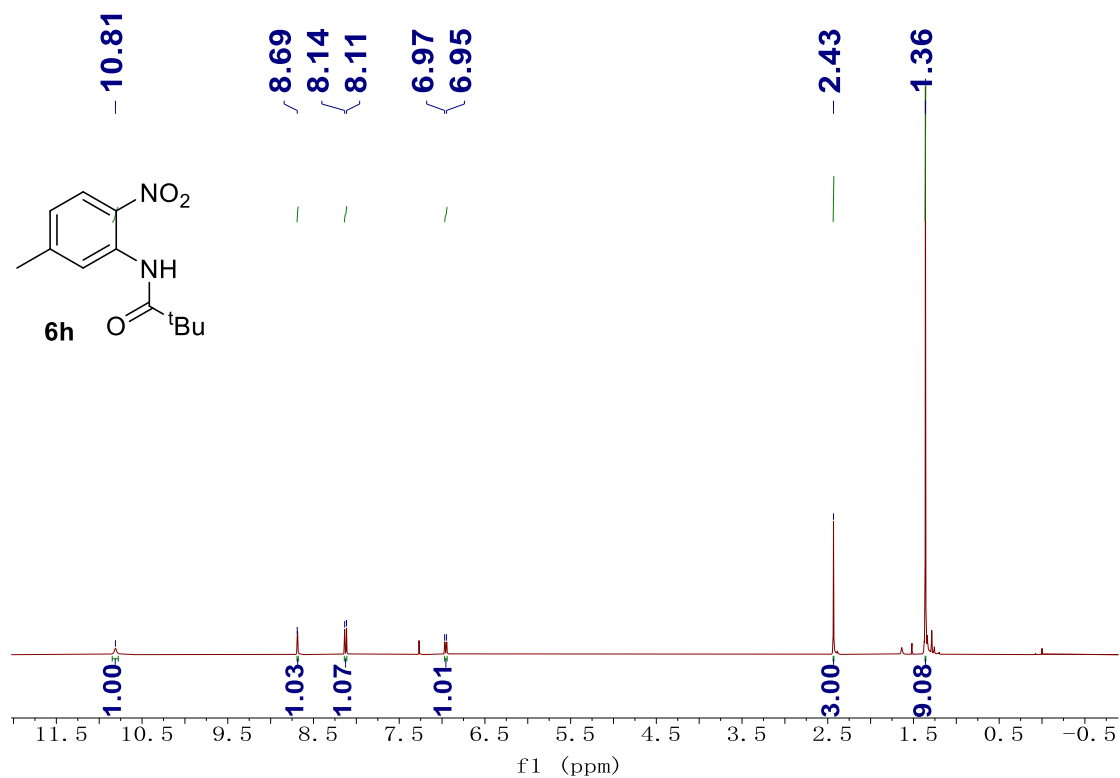

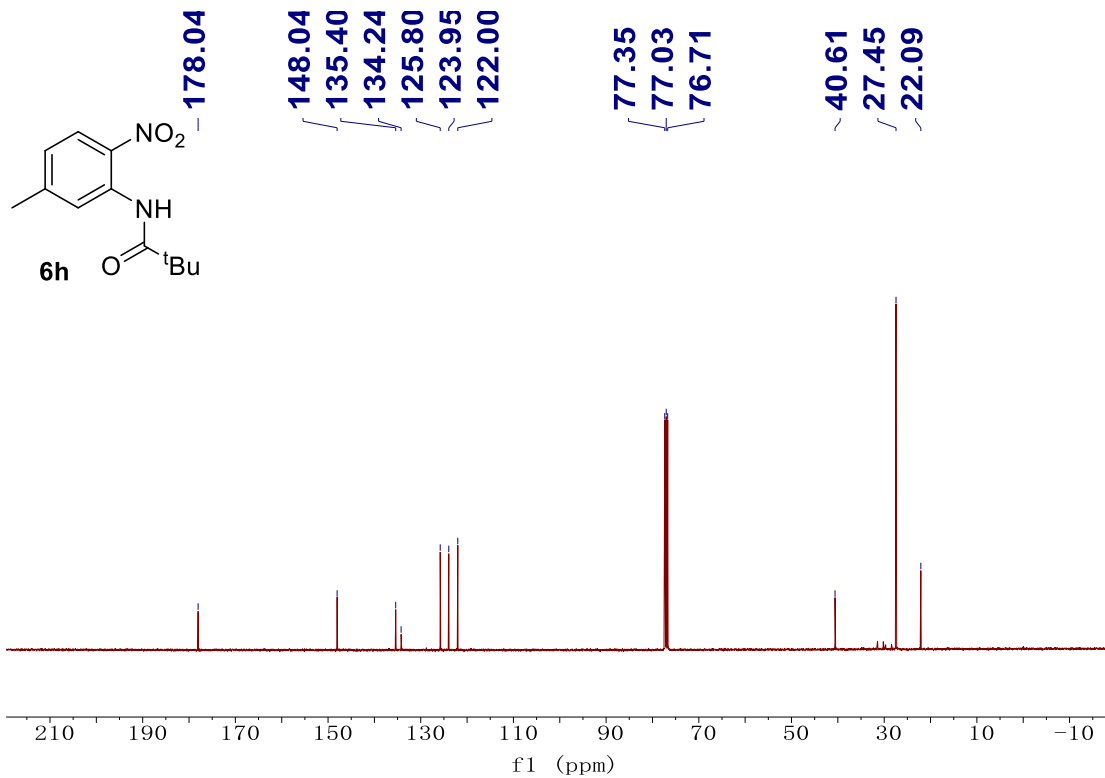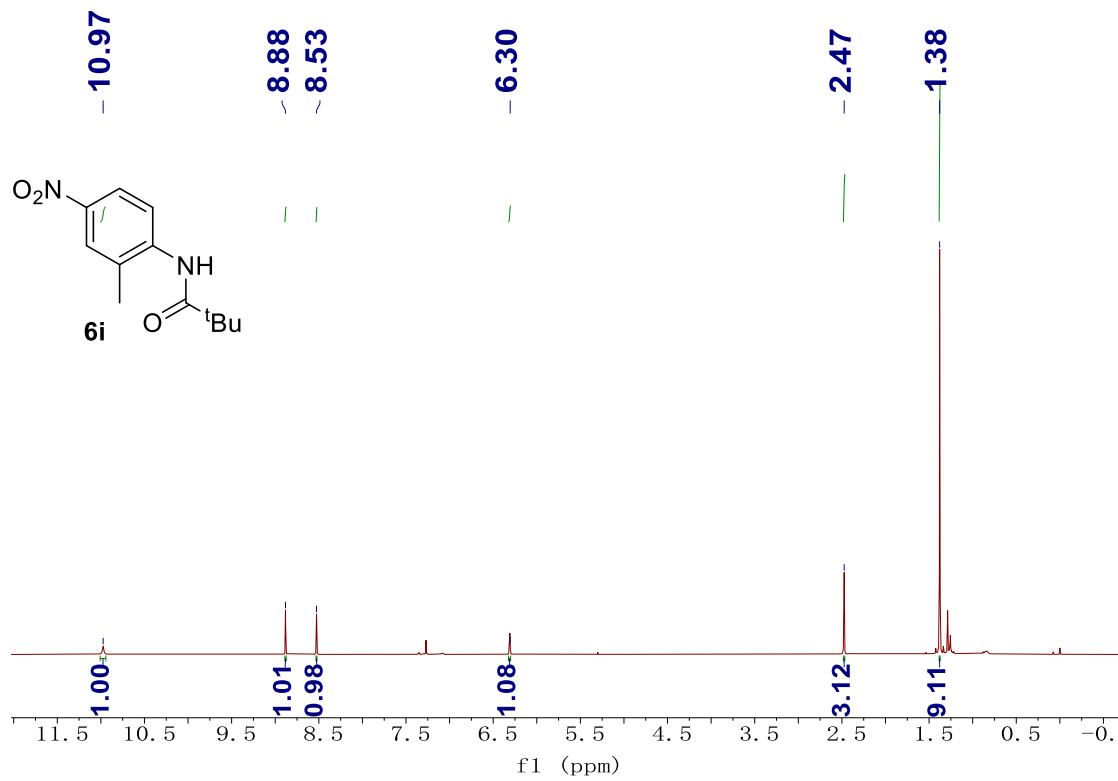

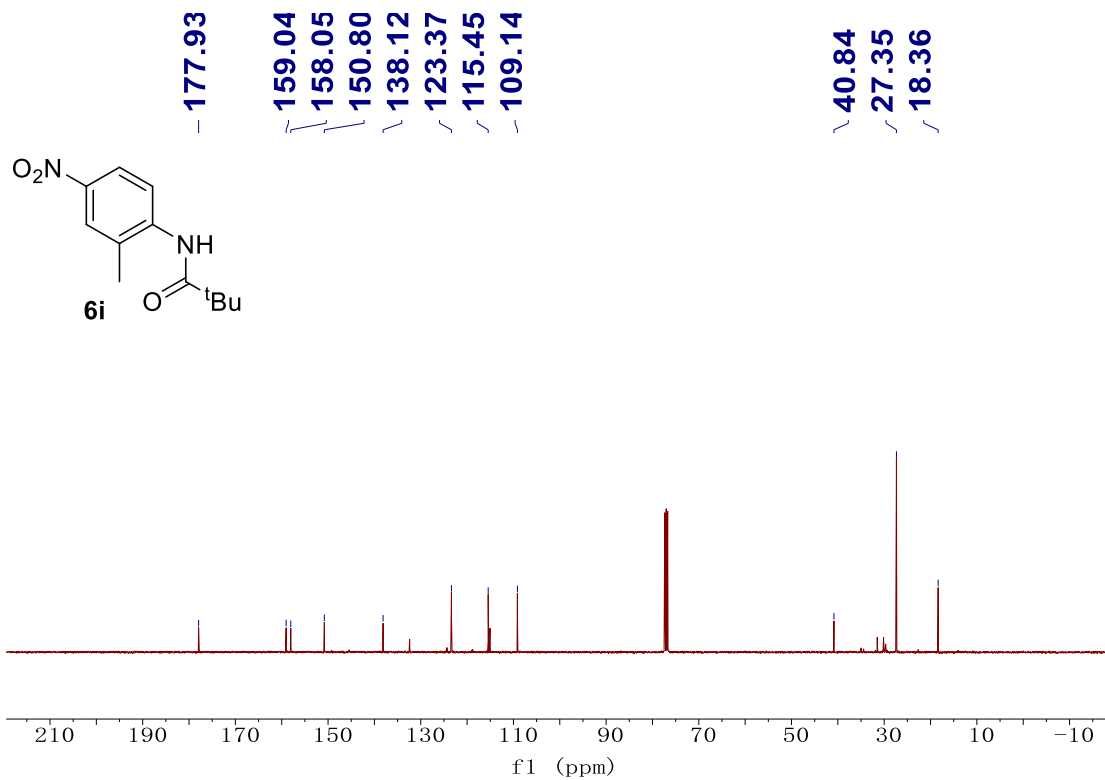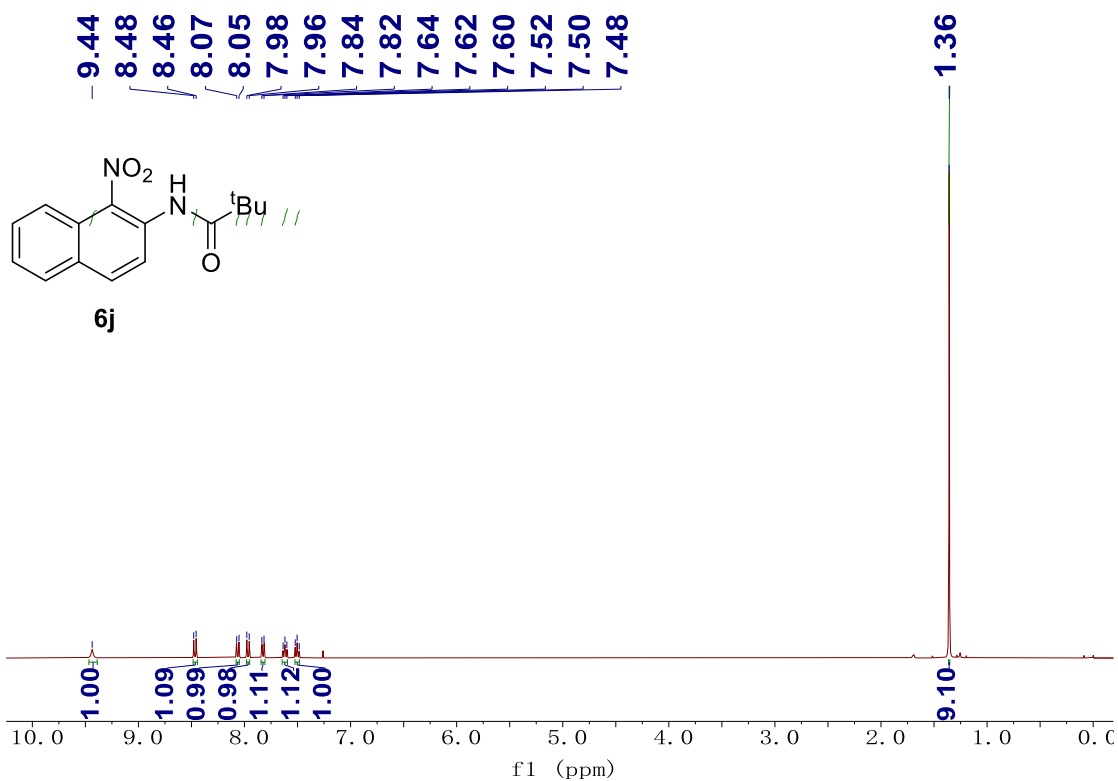

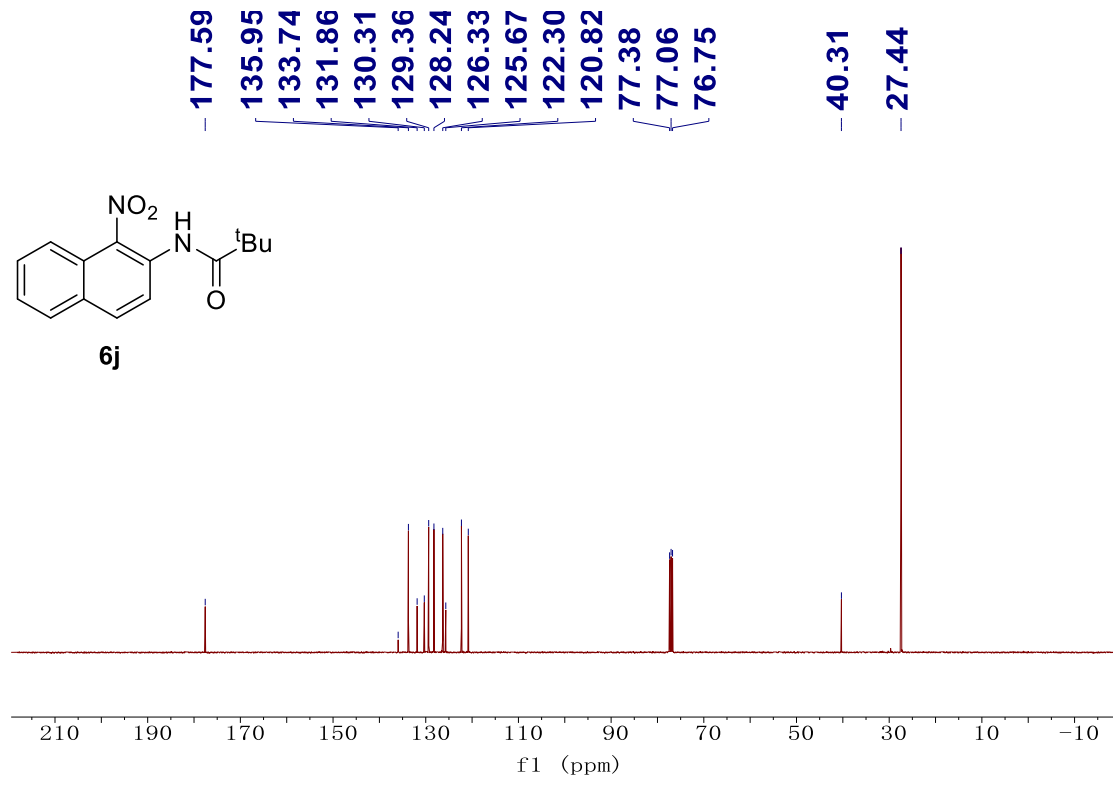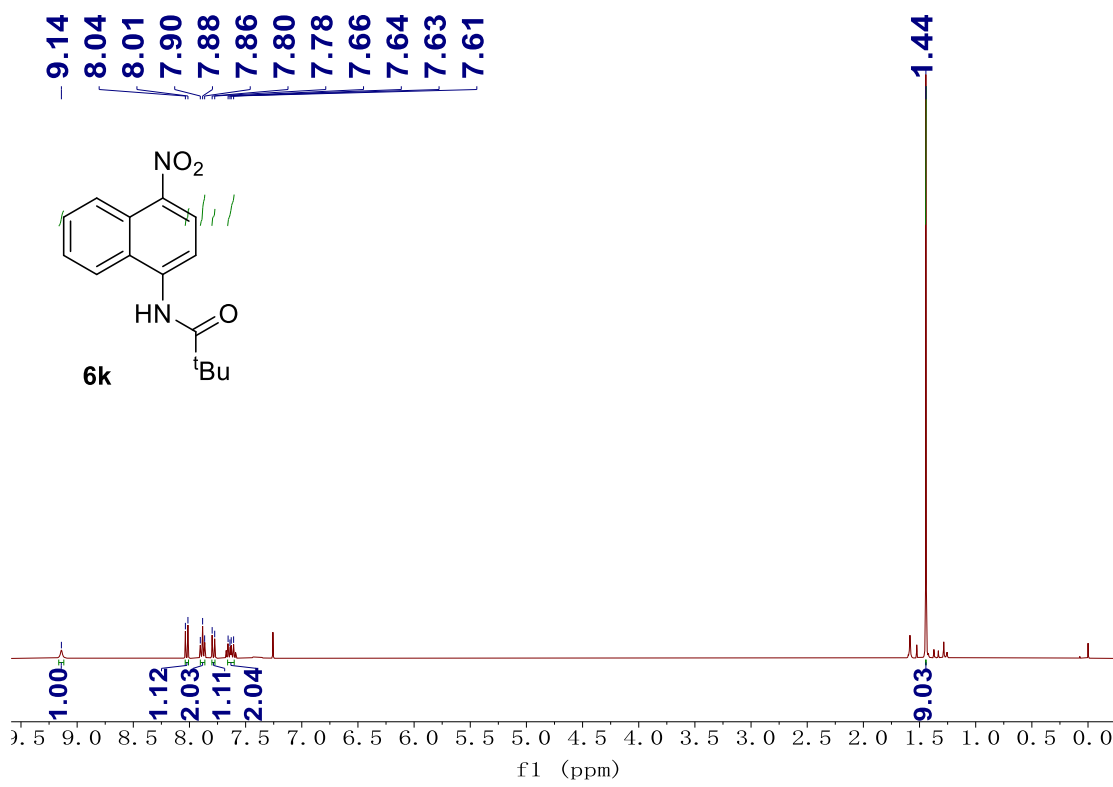



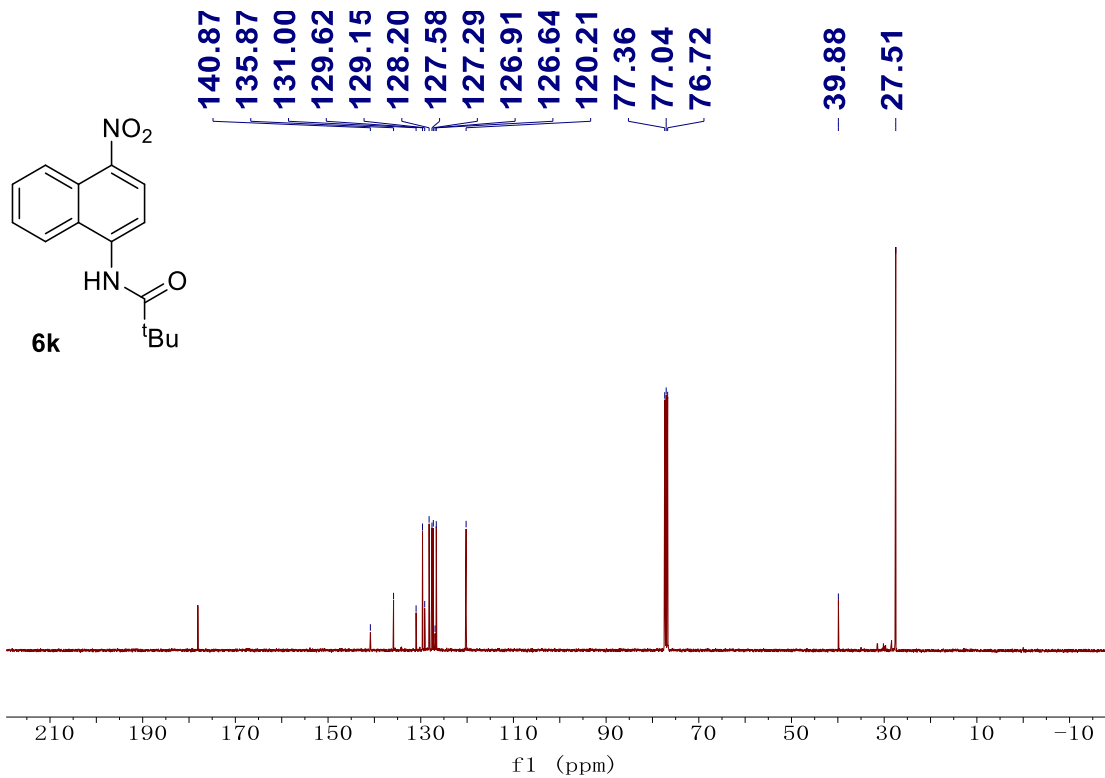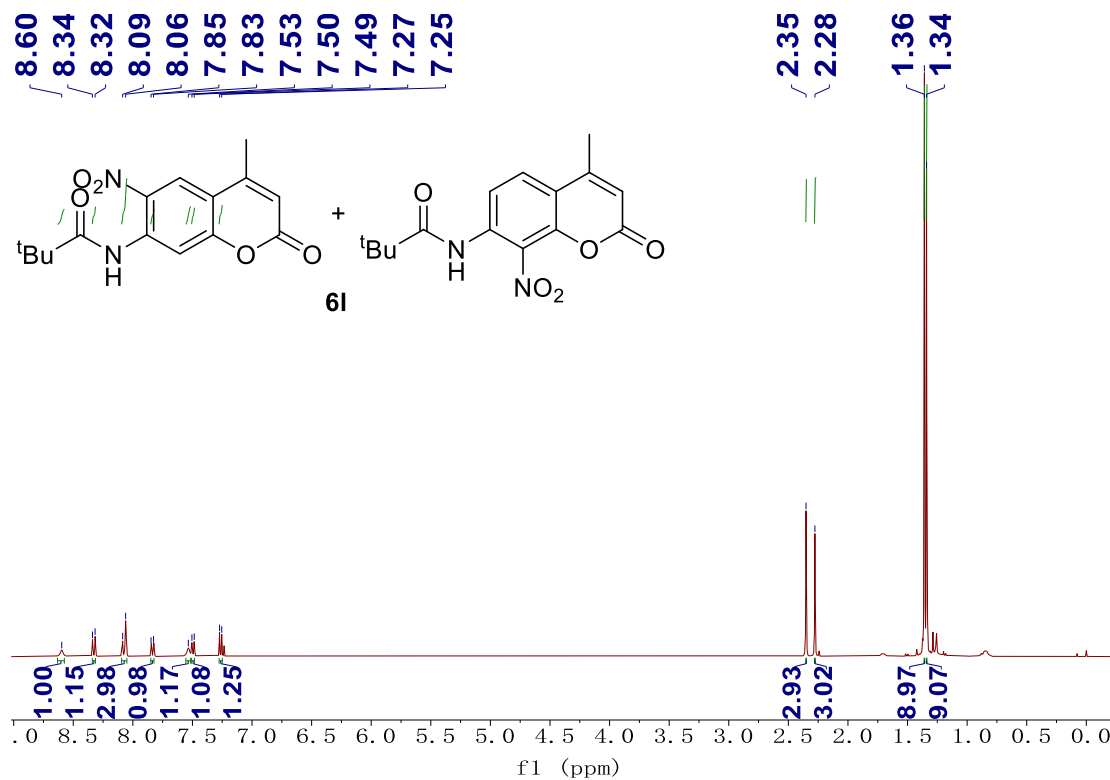

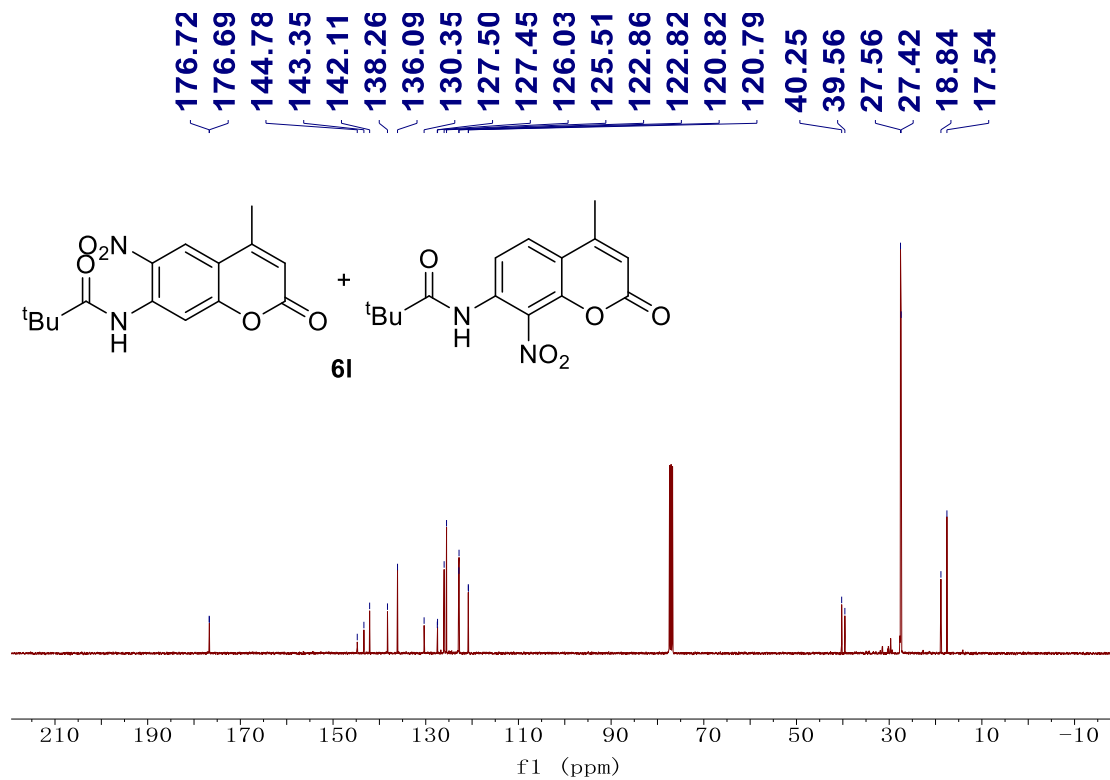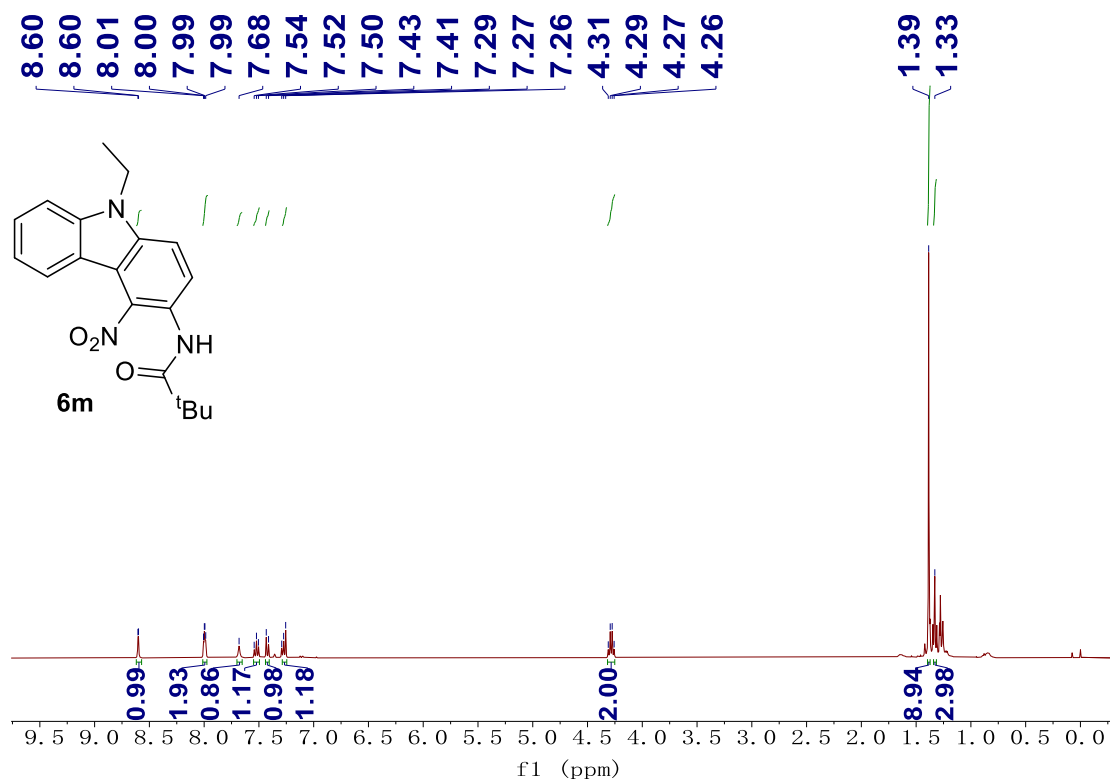

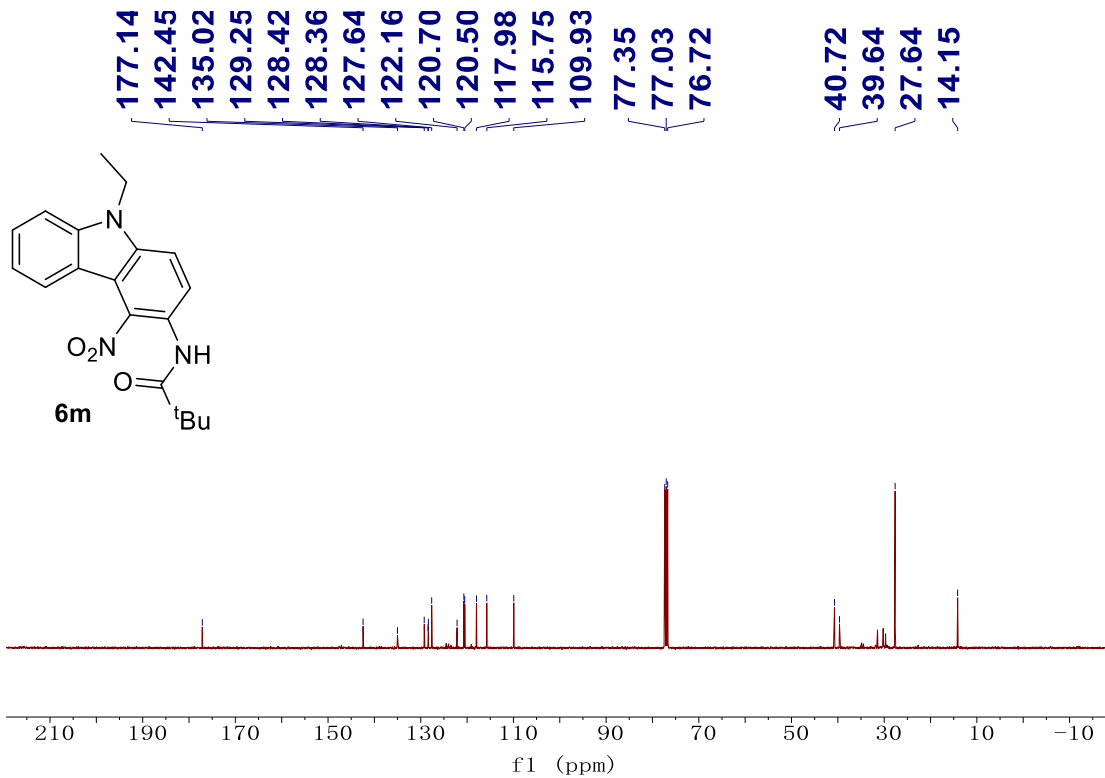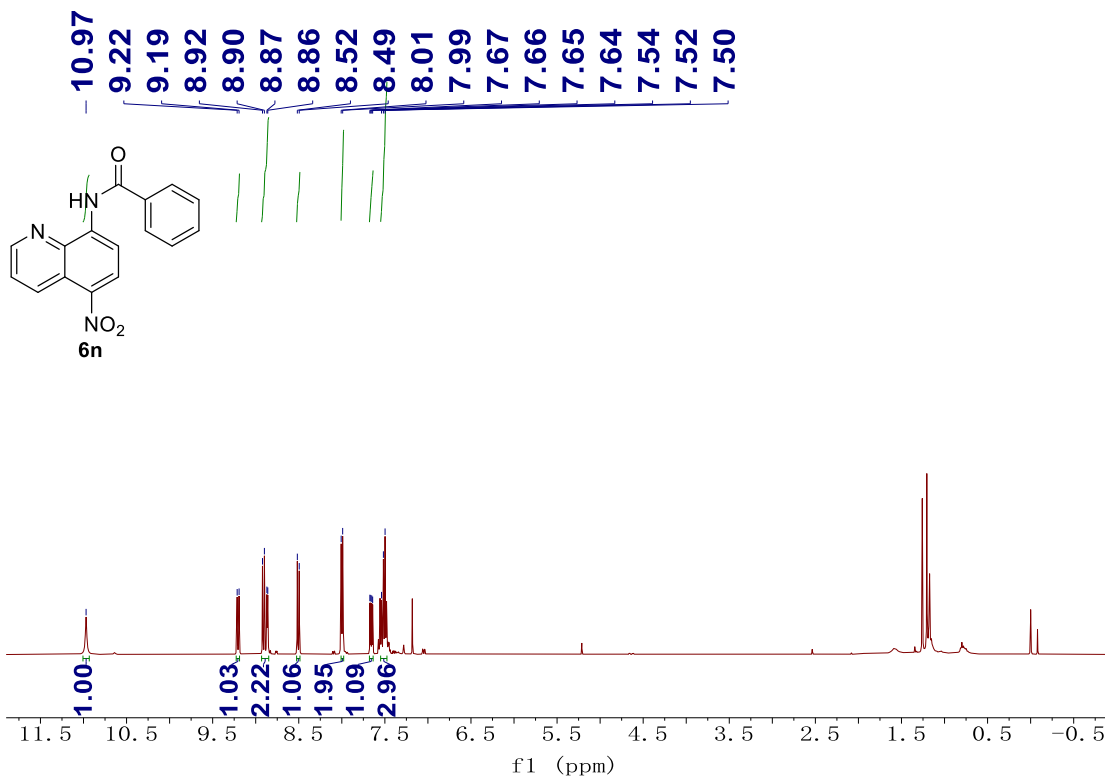

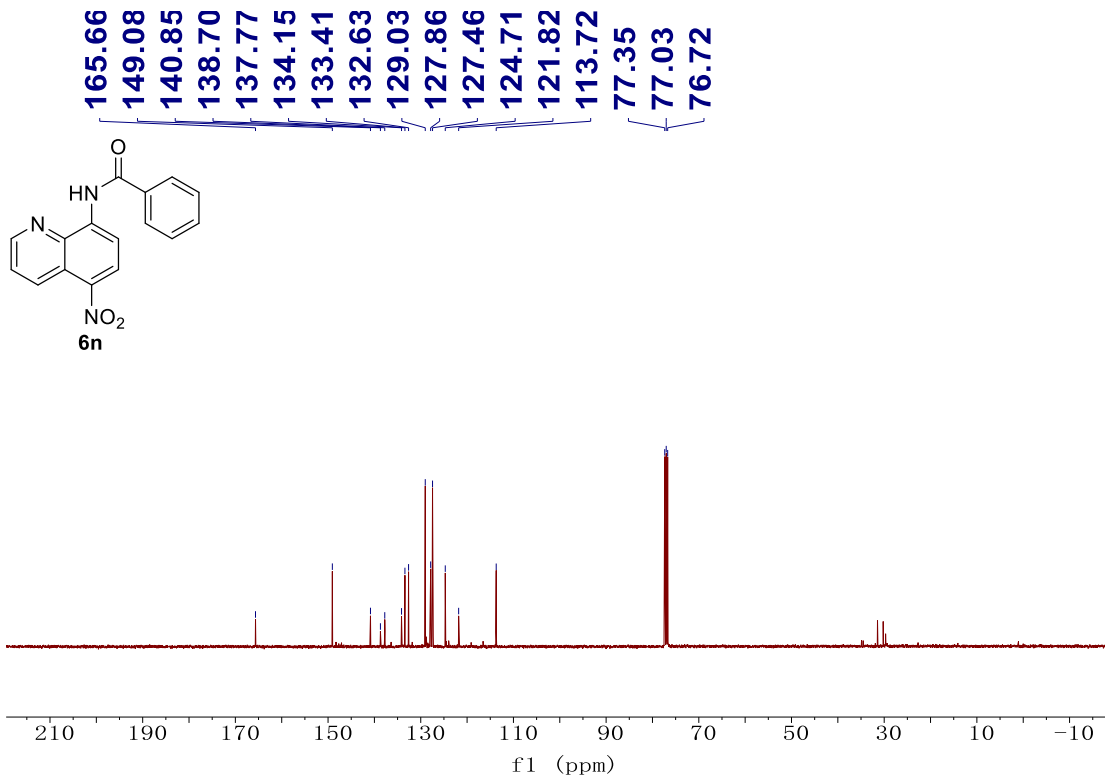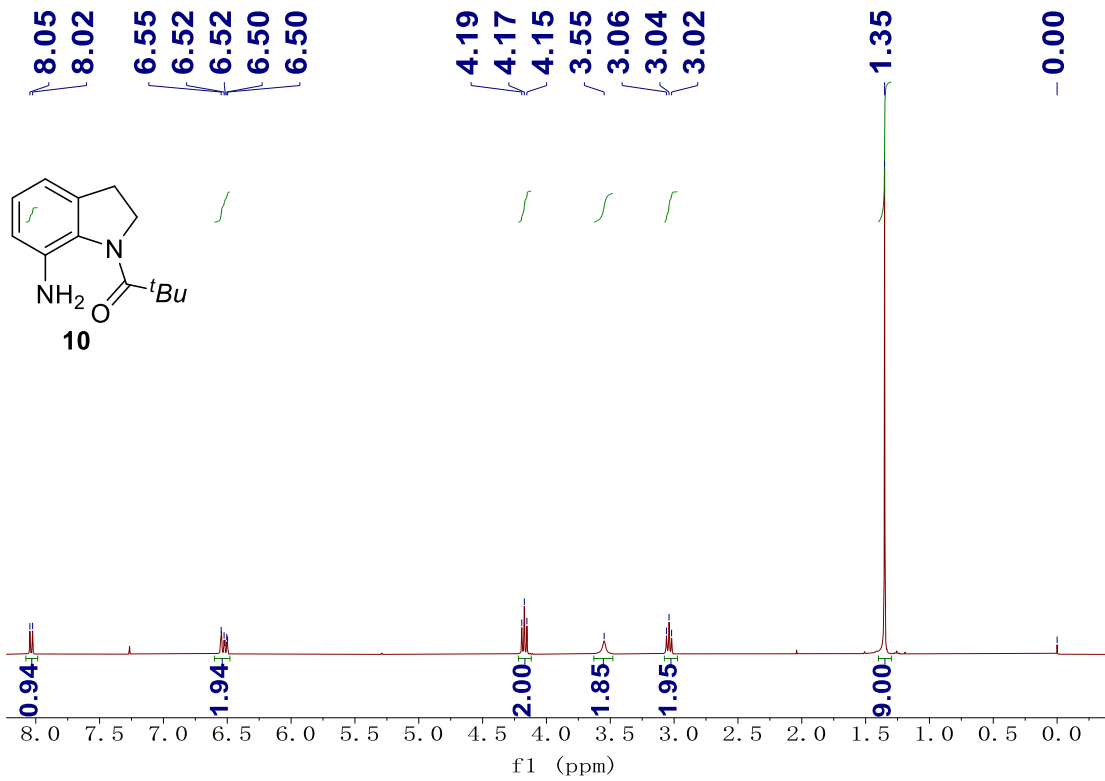

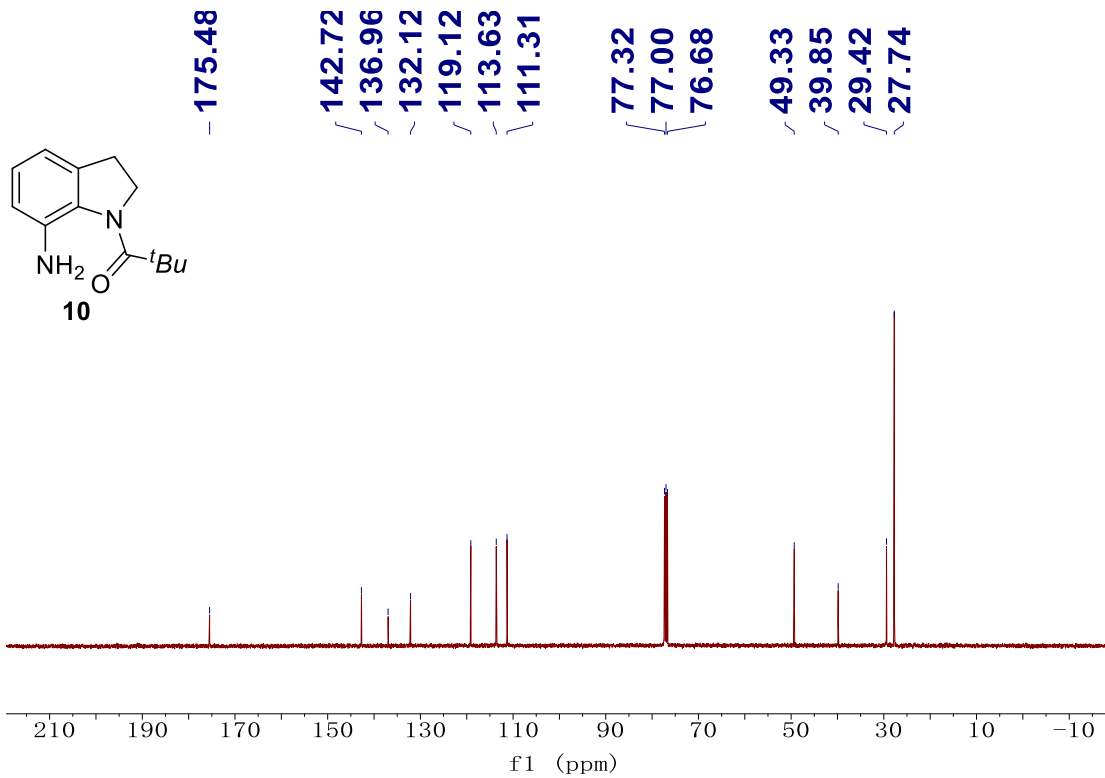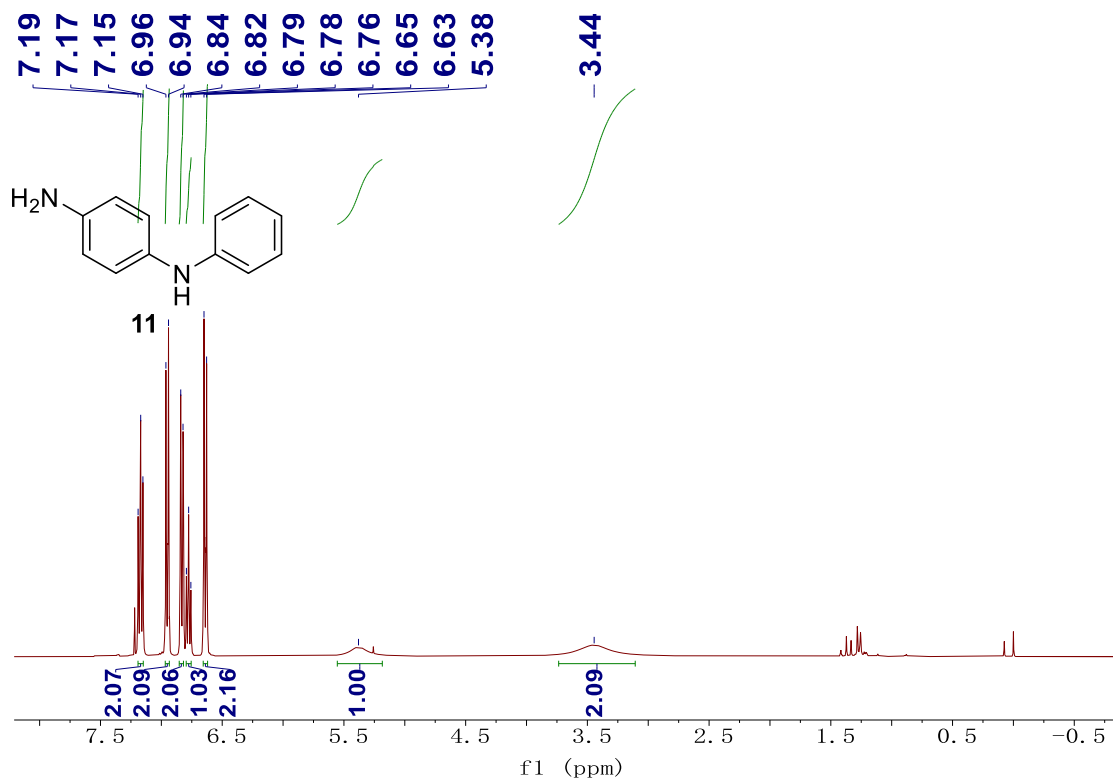

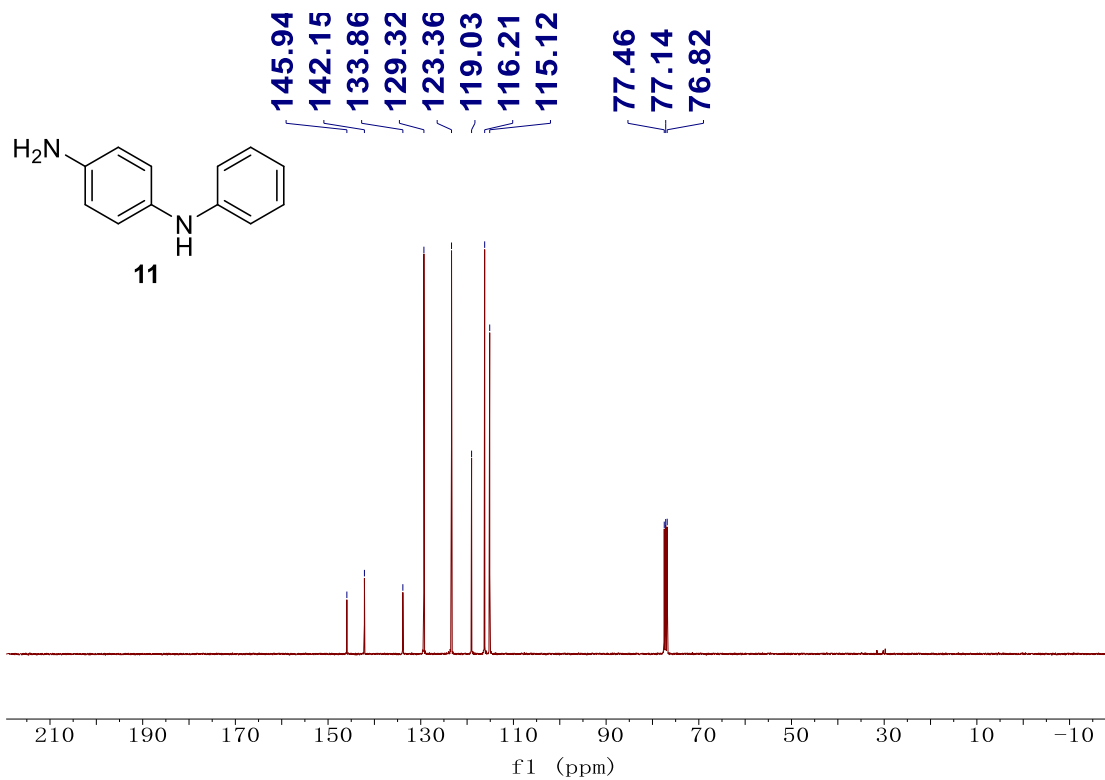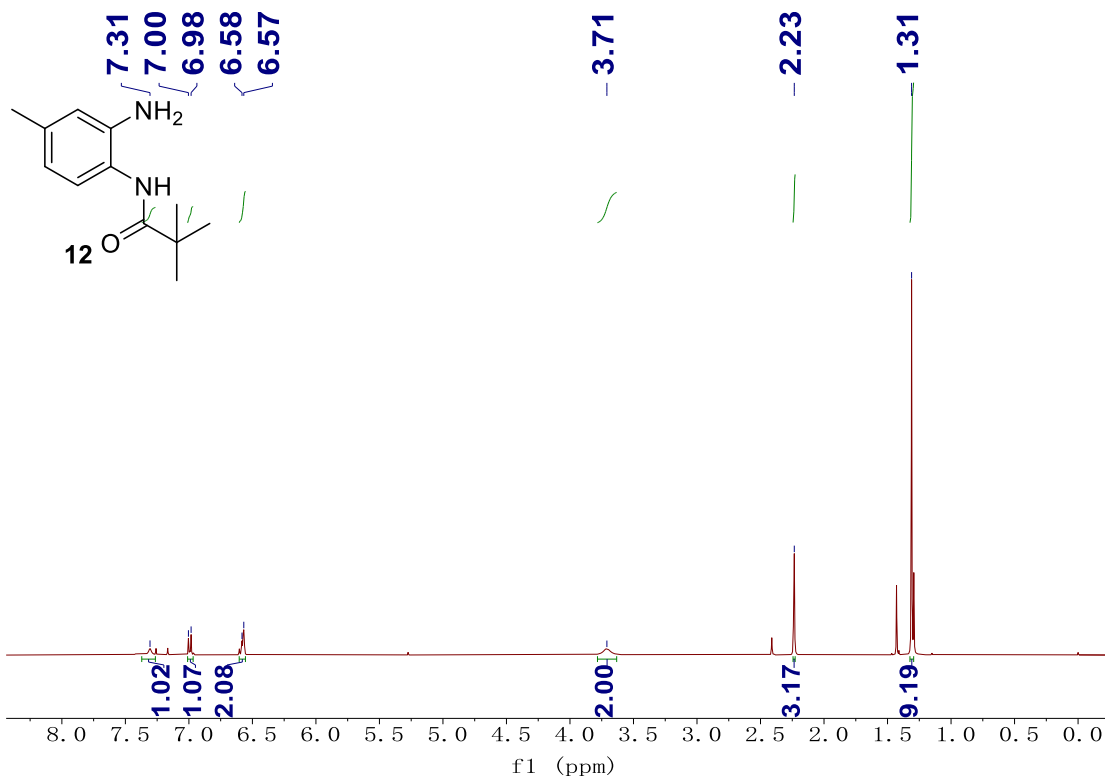

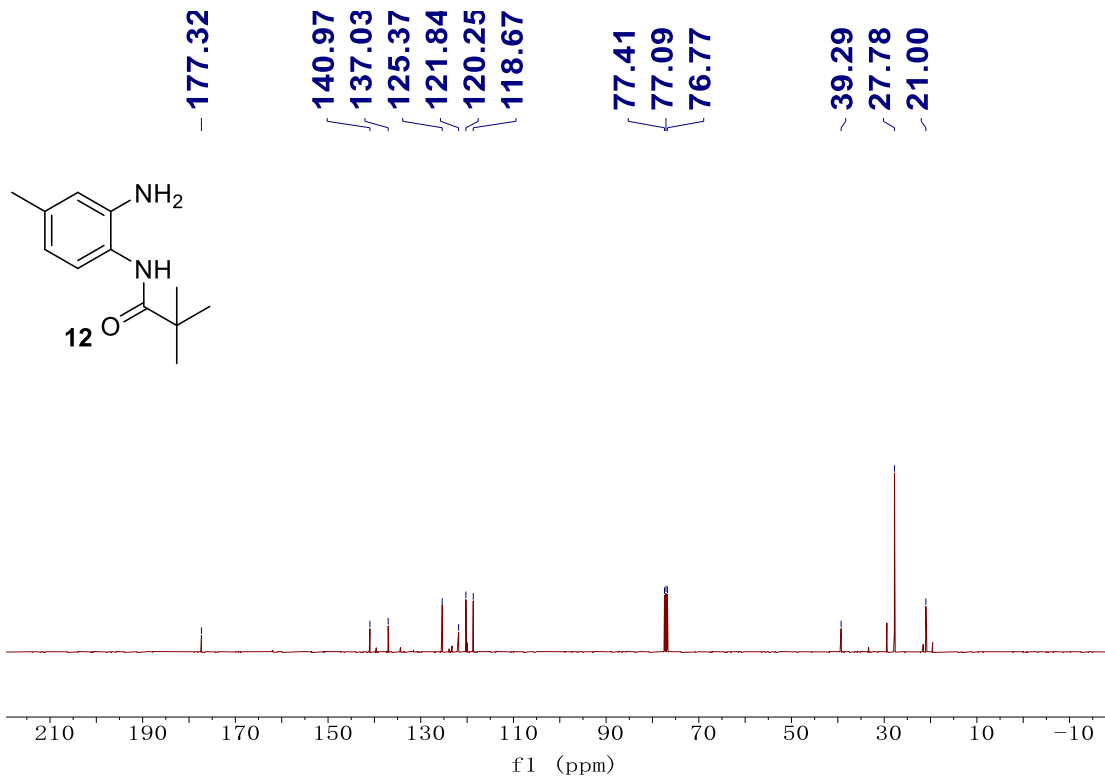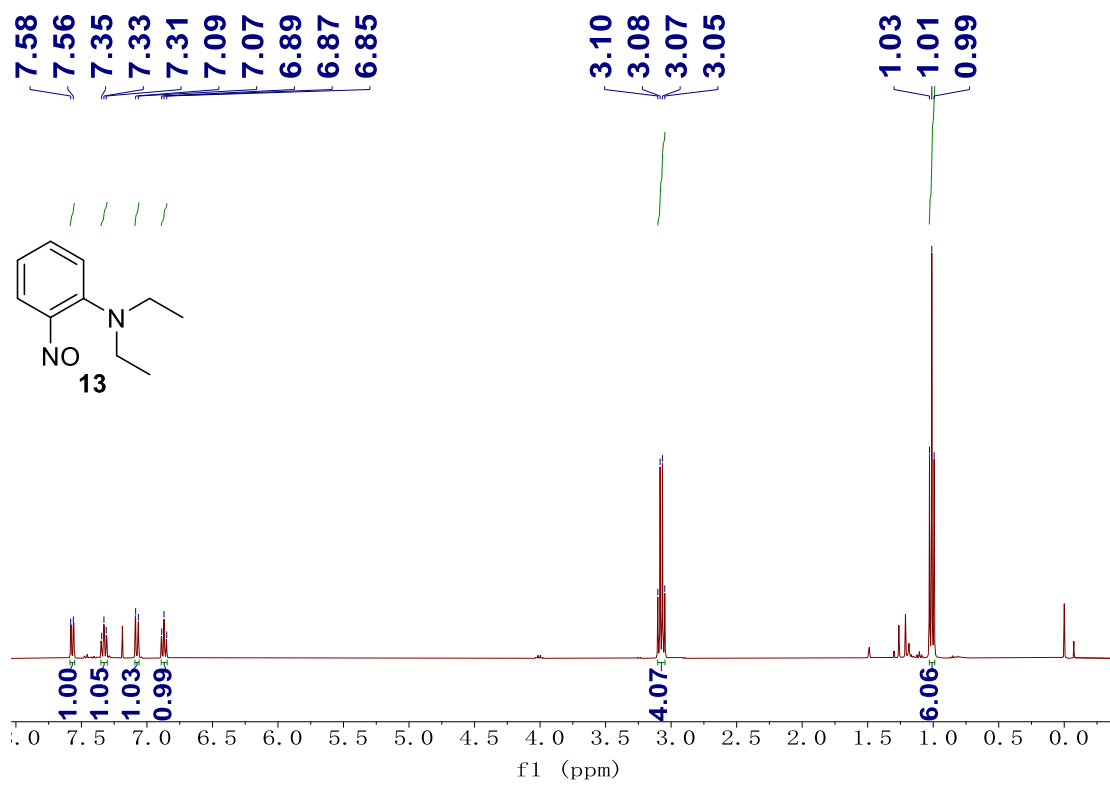

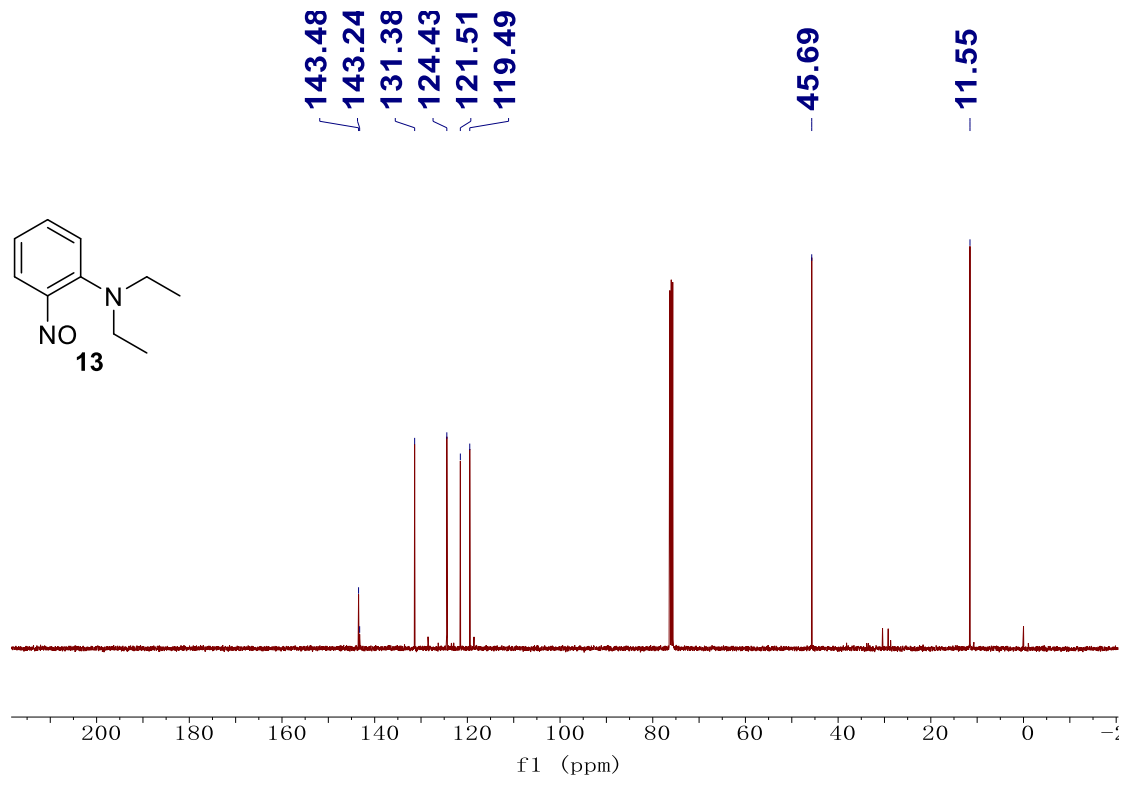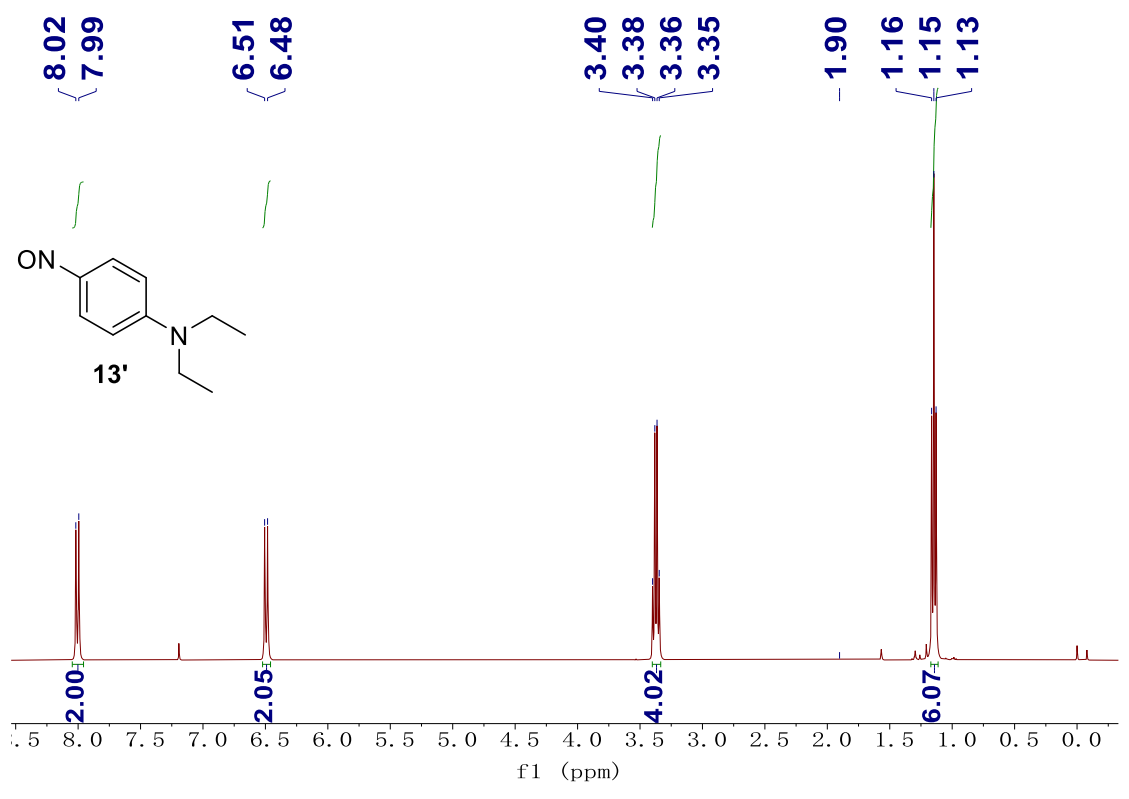



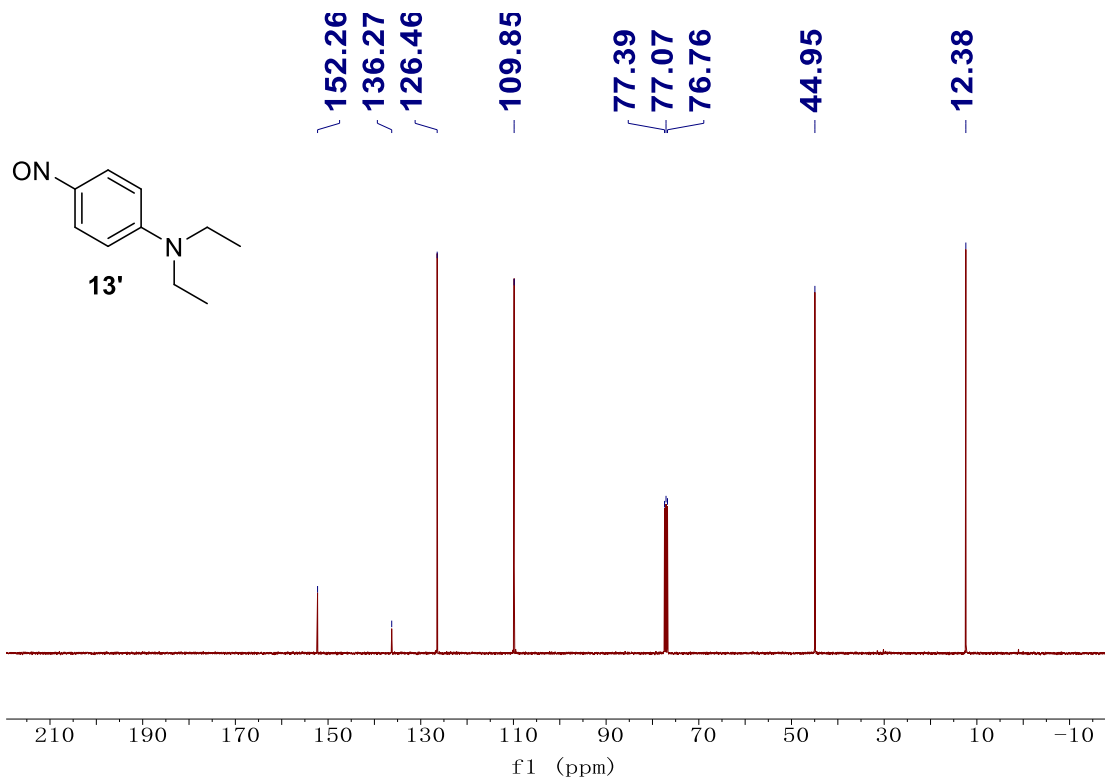

Supplement: d3ob01729j1.pdf [file d3ob01729j1.pdf]
